# Supplementary material for: Synthesis of deoxybenzoins from β-alkoxy styrenes and arylboronic acids via palladium-catalyzed regioselective Heck-arylation reactions
Source: Royal Society of Chemistry journal article supplement (doi:10.1039/d4ob00616j), 2024-01-01
Supplement: d4ob00616j1.pdf [file d4ob00616j1.pdf]

## **SUPPORTING INFORMATION**

### **Synthesis of Deoxybenzoins From $\beta$ -Alkoxy Styrenes and Arylboronic Acids *via* Palladium-Catalyzed Regioselective Heck-Arylation Reactions**

Rapelly Venkatesh,<sup>[a]</sup> Aswathi C Narayan,<sup>[b]</sup> and Jeyakumar Kandasamy\*<sup>[a,b]</sup>

<sup>a</sup> Department of Chemistry, Indian Institute of Technology (BHU), Varanasi, Uttar Pradesh-221005; Email: [jeyakumar.chy@iitbhu.ac.in](mailto:jeyakumar.chy@iitbhu.ac.in);

<sup>b</sup> Department of Chemistry, Pondicherry University, Pondicherry-605014 Email: [jeyakumar.chy@pondiuni.ac.in](mailto:jeyakumar.chy@pondiuni.ac.in)

| <b>Sr. No</b> | <b>List of Contents</b>                                        | <b>Page No.</b> |
|---------------|----------------------------------------------------------------|-----------------|
| 1.            | Experimental Section: General Information                      | 1               |
| 2.            | Experimental Procedures                                        | 2               |
| 3.            | Analytical data for the Products                               | 4               |
| 4.            | References                                                     | 10              |
| 5.            | <sup>1</sup> H and <sup>13</sup> C NMR Spectra of the Products | 12              |

#### **1. Experimental Section: General Information**

All the reactions were carried out using oven dried glasswares. Solvents were evaporated with the help of rotary evaporator. Thin layer chromatography was performed using pre-coated plates obtained from E. Merck (TLC silica gel 60 F254). TLC plates were visualized by exposure to ultraviolet light (UV). The column chromatography was performed on silica gel (100-200 mesh) using a mixture of ethyl acetate and hexane as an eluent. The NMR spectra were recorded on Bruker Avance 400 and 500 MHz NMR spectrometers. The CDCl<sub>3</sub> signals were taken as the reference 7.26 ppm for <sup>1</sup>H NMR spectra and 77.0 ppm for <sup>13</sup>C NMR spectra in CDCl<sub>3</sub>. HRMS were analyzed with Agilent Q-TOF 6230. FT-IR spectra were recorded on a Perkin Elmer spectrometer. All the known products were characterized by proton and carbon NMR and compared with literature data. Starting materials were prepared using literature

procedures as stated below.<sup>1-2</sup> Solvents and chemicals were purchased commercially and used without further purification. The palladium catalysts were purchased from Sigma Aldrich.

## 2. Experimental Procedures:

### 2.1. General procedure for the Synthesis of $\alpha$ -aryl acetophenones **3a-3o**, **4a-4j**:

To the solution of  $\beta$ -methoxystyrene (0.5 mmol) in Acetic acid (3 mL), arylboronic acid (0.6 mmol), palladium acetate (5 mol%) and TEMPO (1.0 mmol) were added sequentially at 40 °C. The reaction mixture was allowed to stir for 4 h. After completion, the reaction mixture was quenched with a saturated aqueous solution of NaHCO<sub>3</sub> (10 mL), extracted with ethyl acetate (2  $\times$  30 mL), washed with water (2  $\times$  20 mL) and washed with brine (2  $\times$  15 mL), dried over anhydrous Na<sub>2</sub>SO<sub>4</sub>. The organic layer was concentrated and purified by column chromatography on silica gel (100-200 mesh) using hexane/ethyl acetate to afford the  $\alpha$ -aryl acetophenones.

### 2.2. Gram scale synthesis of **3a**:

To the solution of styryl ether **1a** (1.0 g, 7.45 mmol) in Acetic acid (20 mL), were added 4-methoxyarylboronic acid **2a** (1.36 g, 8.94 mmol), palladium acetate (84 mg, 5 mol%) and TEMPO (2.33 g, 14.91 mmol) at 40 °C. The reaction mixture was allowed to stir for 4 h. After completion, the reaction mixture was quenched with a saturated aqueous solution of NaHCO<sub>3</sub> (50 mL), extracted with ethyl acetate (2  $\times$  100 mL), washed with water (2  $\times$  50 mL) and washed with brine (2  $\times$  30 mL), dried over anhydrous Na<sub>2</sub>SO<sub>4</sub>. The organic layer was concentrated and purified by column chromatography on silica gel (100-200 mesh) using hexane/ethyl acetate to afford the product **3a** (Yield 82%, 1.38 g).

### 2.3 Synthesis of **5a**:

To the solution of 2'-nitrostyrene methyl ether (**1k**) (180 mg, 1.0 mmol) in Acetic acid (5 mL), arylboronic acid **2b** (147 mg, 1.2 mmol), palladium acetate (12 mg, 5 mol%) and TEMPO (314 mg, 2.0 mmol) were added sequentially at 40 °C. The reaction mixture was allowed to stir for 4 h. After completion, the reaction mixture was quenched with a saturated aqueous solution of NaHCO<sub>3</sub> (10 mL), extracted with ethyl acetate (2  $\times$  50 mL), washed with water (2  $\times$  20 mL) and washed with brine (2  $\times$  15 mL), dried over anhydrous Na<sub>2</sub>SO<sub>4</sub> and concentrated to obtain crude nitro compound, which was subjected to the next step without further purification. Zinc dust (394 mg, 6 mmol) and glacial acetic acid (690  $\mu$ L, 12 mmol) were taken in a 50 mL RB flask. Ethanol (2 mL) and nitro compound were sequentially added by syringe at ambient temperature. The mixture was stirred at 70 °C for 4 hours. After that the reaction mixture was diluted with water (10 mL) and extracted with ethyl acetate (3  $\times$  20 mL). The combined organic

layer was washed with brine, dried over Na<sub>2</sub>SO<sub>4</sub>, and concentrated in vacuum. The residue was purified by column chromatography on silica gel (100-200 mesh) using hexane/ethyl acetate to provide the title compound **5a** (Yield 77%, 150 mg).

#### **2.4. Procedure for the synthesis of fenflumizole (8):**

The title compound was prepared using a literature procedure.<sup>3</sup> To the solution of β-methoxystyrene **11** (1 mmol) in Acetic acid (5 mL), arylboronic acid **2a** (1.2 mmol), palladium acetate (5 mol%) and TEMPO (2.0 mmol) were added sequentially at 40 °C. The reaction mixture was allowed to stir for 4 h. After completion, the reaction mixture was quenched with a saturated aqueous solution of NaHCO<sub>3</sub> (10 mL), extracted with ethyl acetate (2 × 30 mL), washed with water (2 × 20 mL) and washed with brine (2 × 15 mL), dried over anhydrous Na<sub>2</sub>SO<sub>4</sub>. The organic layer was concentrated and purified by column chromatography on silica gel (100-200 mesh) using hexane/ethyl acetate to afford the α-aryl acetophenone **6** (yield 79%, 202 mg). To the solution of ketone **6** (150 mg, 0.58 mmol) in DMF (3 mL) was added DABCO (20 mol%) and stirred at 90 °C for 24 h in air. After completion of the reaction, the mixture was cooled to room temperature, extracted with ethyl acetate (2 × 50 mL), washed with water (2 × 25 mL) and washed with brine (2 × 20 mL), dried over anhydrous Na<sub>2</sub>SO<sub>4</sub>. The organic layer was concentrated and purified by column chromatography on silica gel (100-200 mesh) using hexane/ethyl acetate to afford the 1,2-diketone **7** (Yield 90%, 142 mg). To the solution of 1,2-diketone (**7**) (0.35 mmol) and 2,4-difluorobenzaldehyde (0.53 mmol) in AcOH (3 mL) and NH<sub>4</sub>OAc (1.0 mmol) was added at rt. Then, the reaction mixture was heated at 100 °C for 3 h. After completion of the reaction, the reaction mixture was added to ice-cold water and extracted with ethyl acetate (2 × 50 mL), and washed with brine (2 × 20 mL), dried over anhydrous Na<sub>2</sub>SO<sub>4</sub>. The organic layer was concentrated and purified by column chromatography on silica gel (100-200 mesh) using hexane/ethyl acetate to afford the 76% yield of fenflumizole (**8**).

#### **2.5. Procedure for the synthesis of oxaprozin (10):**

The title compound was prepared using a literature procedure.<sup>4</sup> To a solution of the ketone **3b** (88 mg, 1.0 eq.) in the methyl 3-cyanopropanoate (20 eq.) were added TfOH (6 eq.), oxone (1.1 eq.) and iodine (0.7 eq.). The reaction mixture was allowed to stir for 6 h at 70 °C. After completion of the reaction, a solution of aqueous Na<sub>2</sub>SO<sub>3</sub> and aqueous NaHCO<sub>3</sub> were added and the mixture was extracted with EtOAc. A combined organic layer wash with brine was performed and it was dried over anhydrous Na<sub>2</sub>SO<sub>4</sub>. The crude product was purified by column chromatography on silica gel (100–200 mesh) using ethyl acetate and petroleum ether as an eluent to afford ester **9** (yield 81%, 111 mg). The ester **9** (90 mg, 1.0 eq) was dissolved in ethanol (1.5 ml). LiOH (4 eq.) was dissolved in H<sub>2</sub>O (1.5 ml). Subsequently, both reaction mixtures were combined and stirred at rt for

12 h. After completion of the reaction, 1M HCl was added and the mixture was extracted with EtOAc. A combined organic layer wash with brine was performed and it was dried over anhydrous Na<sub>2</sub>SO<sub>4</sub>. The crude product was purified by column chromatography on silica gel (100–200 mesh) using ethyl acetate and petroleum ether as an eluent to afford oxaprozin **10** (yield 88%, 75 mg).

### 3. Analytical data for the Products:

#### 1-(4-methoxyphenyl)-2-phenylethan-1-one (**3a**)<sup>1</sup>:

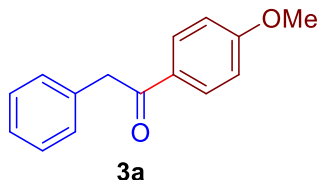

The title compound was obtained as a colourless solid. Yield 90% (101 mg), mp 78–80 °C. *R<sub>f</sub>* (5% EtOAc/Hexane): 0.45. <sup>1</sup>H NMR (500 MHz, CDCl<sub>3</sub>) δ 7.94 – 7.88 (m, 2H), 7.23 (dd, *J* = 10.0, 4.6 Hz, 2H), 7.19 – 7.13 (m, 3H), 6.86 – 6.82 (m, 2H), 4.14 (s, 2H), 3.76 (s, 3H). <sup>13</sup>C NMR (125 MHz, CDCl<sub>3</sub>) δ 196.1, 163.4, 134.9, 130.8, 129.5, 129.3, 128.5, 126.7, 113.7, 55.4, 45.2.

#### 1,2-diphenylethan-1-one (**3b**)<sup>1</sup>:

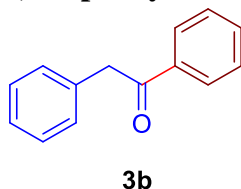

The title compound was obtained as a colourless solid. Yield 90% (88 mg), mp 132–134 °C. *R<sub>f</sub>* (10% EtOAc/Hexane): 0.5. <sup>1</sup>H NMR (500 MHz, CDCl<sub>3</sub>) δ 8.04 (dd, *J* = 8.2, 1.0 Hz, 2H), 7.57 (dd, *J* = 10.5, 4.3 Hz, 1H), 7.47 (dd, *J* = 10.5, 4.8 Hz, 2H), 7.35 (t, *J* = 7.4 Hz, 2H), 7.32 – 7.27 (m, 3H), 4.31 (s, 2H). <sup>13</sup>C NMR (125 MHz, CDCl<sub>3</sub>) δ 197.4, 136.4, 134.4, 133.0, 129.3, 128.5, 128.5, 128.4, 126.7, 45.3.

#### 2-phenyl-1-(p-tolyl)ethan-1-one (**3c**)<sup>1</sup>:

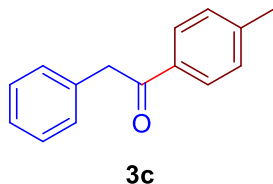

The title compound was obtained as a colourless solid. Yield 84% (88 mg), mp 109–111 °C. *R<sub>f</sub>* (5% EtOAc/Hexane): 0.34. <sup>1</sup>H NMR (500 MHz, CDCl<sub>3</sub>) δ 7.84 (d, *J* = 8.2 Hz, 2H), 7.26 – 7.22 (m, 2H), 7.18 (dt, *J* = 7.9, 4.0 Hz, 5H), 4.18 (s, 2H), 2.32 (s, 3H). <sup>13</sup>C NMR (125 MHz, CDCl<sub>3</sub>) δ 197.3, 143.9, 134.7, 134.0, 129.4, 129.3, 128.7, 128.6, 126.7, 45.3, 21.6.

#### 1-(4-hydroxyphenyl)-2-phenylethan-1-one (**3d**)<sup>5</sup>:

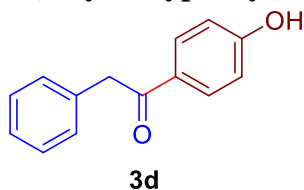

The title compound was obtained as a colourless solid. Yield 81% (86 mg), mp 150–152 °C. *R<sub>f</sub>* (20% EtOAc/Hexane): 0.26. <sup>1</sup>H NMR (500 MHz, CDCl<sub>3</sub>) δ 8.01 – 7.93 (m, 2H), 7.33 (dd, *J* = 10.0, 4.6 Hz, 2H), 7.30 – 7.26 (m, 4H), 6.90 – 6.85 (m, 2H), 4.26 (s, 2H). <sup>13</sup>C NMR (125 MHz, CDCl<sub>3</sub>) δ 196.9, 160.5, 134.7, 131.3, 129.3, 128.6, 126.8, 115.4, 45.2.

#### 1-(4-(methylthio)phenyl)-2-phenylethan-1-one (**3e**)<sup>1</sup>:

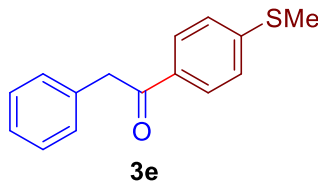

The title compound was obtained as a yellow solid, mp 96–98 °C. *R<sub>f</sub>* (5% EtOAc/Hexane): 0.4. <sup>1</sup>H NMR (500 MHz, CDCl<sub>3</sub>) δ 7.92 (d, *J* = 8.6 Hz, 2H), 7.32 (dd, *J* = 10.0, 4.7 Hz, 2H), 7.27 – 7.24 (m, 8H), 4.24 (s, 2H), 2.51 (s, 3H). <sup>13</sup>C NMR (125 MHz, CDCl<sub>3</sub>) δ 196.65, 146.03, 134.67, 132.82, 129.36, 129.05, 128.67, 126.85, 124.99, 77.25, 77.00, 76.75, 45.36, 14.72.

#### 1-(4-acetylphenyl)-2-phenylethan-1-one (**3f**)<sup>1</sup>:

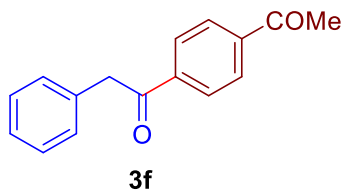

The title compound was obtained as a colourless solid. Yield 78% (93 mg), mp 138–140 °C.  $R_f$  (10% EtOAc/Hexane): 0.3.  $^1\text{H NMR}$  (500 MHz,  $\text{CDCl}_3$ )  $\delta$  8.10 – 8.05 (m, 2H), 8.04 – 7.99 (m, 2H), 7.38 – 7.30 (m, 2H), 7.27 – 7.25 (m, 3H), 4.31 (s, 2H), 2.63 (s, 3H).  $^{13}\text{C NMR}$  (125 MHz,  $\text{CDCl}_3$ )  $\delta$  197.4, 197.0, 140.1, 139.6, 133.9, 129.3, 128.7, 128.7, 128.4, 127.0, 45.8, 26.8.

**1-(4-chlorophenyl)-2-phenylethan-1-one (3g)<sup>1</sup>:**

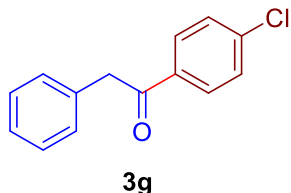

The title compound was obtained as a colourless liquid. Yield 80% (92 mg).  $R_f$  (5% EtOAc/Hexane): 0.32.  $^1\text{H NMR}$  (500 MHz,  $\text{CDCl}_3$ )  $\delta$  7.94 (d,  $J = 8.6$  Hz, 1H), 7.42 (d,  $J = 8.6$  Hz, 1H), 7.33 (t,  $J = 7.3$  Hz, 1H), 7.28 – 7.24 (m, 2H), 4.26 (s, 1H).  $^{13}\text{C NMR}$  (125 MHz,  $\text{CDCl}_3$ )  $\delta$  196.4, 139.6, 134.8, 134.1, 130.0, 129.3, 128.9, 128.7, 127.0, 45.5.

**1-(3-bromophenyl)-2-phenylethan-1-one (3h)<sup>1</sup>:**

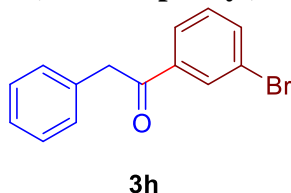

The title compound was obtained as a light yellow solid. Yield 78% (107 mg), mp 83–85 °C.  $R_f$  (5% EtOAc/Hexane): 0.35.  $^1\text{H NMR}$  (500 MHz,  $\text{CDCl}_3$ )  $\delta$  8.13 (s, 1H), 7.91 (d,  $J = 7.8$  Hz, 1H), 7.70 – 7.61 (m, 1H), 7.34 – 7.29 (m, 3H), 7.28 – 7.22 (m, 3H), 4.24 (s, 2H).  $^{13}\text{C NMR}$  (125 MHz,  $\text{CDCl}_3$ )  $\delta$  196.1, 138.2, 135.9, 133.8, 131.5, 130.1, 129.3, 128.7, 127.0, 127.0, 122.9, 45.4.

**1-(4-bromo-3-methylphenyl)-2-phenylethan-1-one (3i):**

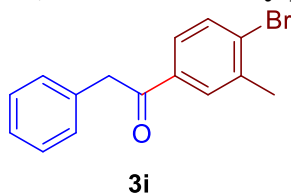

The title compound was obtained as a yellow liquid. Yield 72% (104 mg).  $R_f$  (5% EtOAc/Hexane): 0.3.  $^1\text{H NMR}$  (500 MHz,  $\text{CDCl}_3$ )  $\delta$  7.76 (d,  $J = 2.0$  Hz, 1H), 7.55 (d,  $J = 2.0$  Hz, 1H), 7.51 (d,  $J = 8.3$  Hz, 1H), 7.28 – 7.18 (m, 3H), 7.18 – 7.16 (m, 1H), 7.14 (s, 1H), 4.14 (s, 2H), 2.34 (s, 3H).  $^{13}\text{C NMR}$  (125 MHz,  $\text{CDCl}_3$ )  $\delta$  196.8, 138.5, 135.5, 134.2, 132.6, 130.7, 130.6, 129.3, 128.6, 127.3, 126.9, 45.4, 22.9. HRMS (ESI):  $m/z$   $[\text{M} + \text{Na}]^+$  calculated for :  $\text{C}_{15}\text{H}_{13}\text{BrNaO}$ : 311.0047; found: 311.0063. IR: (KBr)  $\nu_{\text{max}}$  2992, 1675, 1609, 1257, 1103, 926, 814, 733, 699, 545  $\text{cm}^{-1}$ .

**1-(2,4-dichlorophenyl)-2-phenylethan-1-one (3j)<sup>6</sup>:**

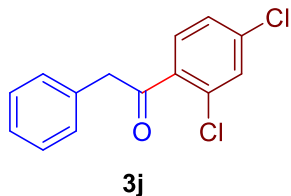

The title compound was obtained as a light-yellow liquid. Yield 74% (98 mg).  $R_f$  (5% EtOAc/Hexane): 0.35.  $^1\text{H NMR}$  (500 MHz,  $\text{CDCl}_3$ )  $\delta$  7.85 (d,  $J = 1.9$  Hz, 2H), 7.54 (t,  $J = 1.9$  Hz, 1H), 7.35 (t,  $J = 7.4$  Hz, 2H), 7.29 (d,  $J = 7.4$  Hz, 1H), 7.24 – 7.23 (m, 2H), 4.23 (s, 2H).  $^{13}\text{C NMR}$  (125 MHz,  $\text{CDCl}_3$ )  $\delta$  195.0, 138.9, 135.6, 133.3, 132.8, 129.9, 129.3, 128.8, 128.1, 127.2, 126.9, 45.5.

**1-(2-ethylphenyl)-2-phenylethan-1-one (3k):**

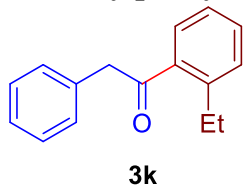

The title compound was obtained as a colourless liquid. Yield 68% (76 mg).  $R_f$  (5% EtOAc/Hexane): 0.38.  $^1\text{H NMR}$  (500 MHz,  $\text{CDCl}_3$ )  $\delta$  7.66 – 7.62 (m, 1H), 7.38 (td,  $J = 7.7, 1.4$  Hz, 1H), 7.33 – 7.29 (m, 2H), 7.27 – 7.21 (m, 5H), 4.19 (s, 2H), 2.75 (q,  $J = 7.5$  Hz, 2H), 1.13 (t,  $J = 7.5$  Hz, 3H).  $^{13}\text{C NMR}$  (125 MHz,  $\text{CDCl}_3$ )  $\delta$  201.9, 144.2,

137.8, 134.3, 131.2, 130.3, 129.5, 128.5, 128.1, 126.8, 125.5, 48.8, 26.8, 15.9. HRMS (ESI):  $m/z$   $[M + H]^+$  calculated for :  $C_{16}H_{17}O$ : 225.1279; found: 225.1285. IR:(KBr)  $\nu_{max}$  2988, 1673, 1609, 1282, 1119, 928, 803, 776, 684, 576  $cm^{-1}$ .

**1-(naphthalen-1-yl)-2-phenylethan-1-one<sup>1</sup>:**

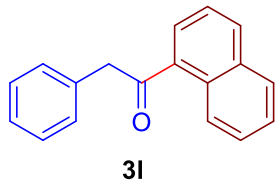

3l

The title compound was obtained as a colourless solid. Yield 82% (100 mg), mp 60–62 °C.  $R_f$  (5% EtOAc/Hexane): 0.33.  $^1H$  NMR (400 MHz,  $CDCl_3$ )  $\delta$  8.52 – 8.45 (m, 1H), 7.87 (dd,  $J = 12.2, 4.9$  Hz, 2H), 7.77 (dd,  $J = 8.3, 1.1$  Hz, 1H), 7.50 – 7.37 (m, 3H), 7.26 – 7.18 (m, 4H), 7.18 – 7.13 (m, 1H), 4.28 (s, 2H).  $^{13}C$  NMR (100 MHz,  $CDCl_3$ )  $\delta$  201.4, 135.5, 134.5, 133.9, 132.7, 130.3, 129.4, 128.6, 128.3, 127.9, 127.8, 126.9, 126.4, 125.7, 124.2, 48.8.

**2-phenyl-1-(3,4,5-trimethoxyphenyl)ethan-1-one<sup>7</sup>:**

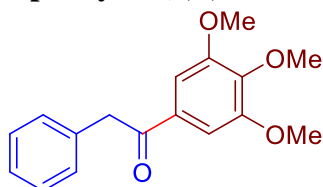

3m

The title compound was obtained as a colourless solid. Yield 75% (107 mg), mp 92–94 °C.  $R_f$  (10% EtOAc/Hexane): 0.27.  $^1H$  NMR (400 MHz,  $CDCl_3$ )  $\delta$  7.26 (ddd,  $J = 7.1, 4.4, 1.6$  Hz, 2H), 7.22 – 7.14 (m, 5H), 4.17 (s, 2H), 3.83 (s, 3H), 3.81 (s, 6H).  $^{13}C$  NMR (100 MHz,  $CDCl_3$ )  $\delta$  196.4, 152.9, 142.5, 134.8, 131.6, 129.2, 128.7, 126.9, 106.2, 60.8, 56.2, 45.6.

**2-phenyl-1-(pyridin-4-yl)ethan-1-one (3m)<sup>8</sup>:**

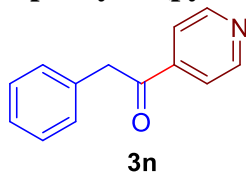

3n

The title compound was obtained as a yellow solid. Yield 38% (37 mg), mp 102–104 °C.  $R_f$  (30% EtOAc/Hexane): 0.6.  $^1H$  NMR (400 MHz,  $CDCl_3$ )  $\delta$  8.40 – 8.34 (m, 2H), 7.64 – 7.60 (m, 1H), 7.47 – 7.41 (m, 2H), 7.23 – 7.12 (m, 1H), 7.10 – 7.01 (m, 1H), 6.95 – 6.91 (m, 1H), 6.88 – 6.84 (m, 1H), 3.93 (s, 2H).  $^{13}C$  NMR (100 MHz,  $CDCl_3$ )  $\delta$  196.1, 167.1, 165.6, 149.8, 149.3, 141.4, 137.5, 132.5, 131.7, 129.9, 128.6, 127.7, 127.3, 126.1, 122.1, 120.5, 44.5, 39.6, 39.4, 39.1, 38.9, 38.7, 38.5, 38.3.

**2-phenyl-1-(pyridin-3-yl)ethan-1-one (3n)<sup>9</sup>:**

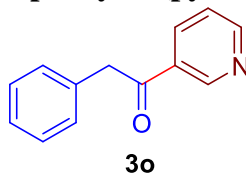

3o

The title compound was obtained as a yellow solid. Yield 35% (34 mg), mp 87–89 °C.  $R_f$  (20% EtOAc/Hexane): 0.35.  $^1H$  NMR (400 MHz,  $CDCl_3$ )  $\delta$  9.22 (dd,  $J = 2.3, 0.8$  Hz, 1H), 8.75 (dd,  $J = 4.8, 1.7$  Hz, 1H), 8.27 – 8.23 (m, 1H), 7.39 (ddd,  $J = 8.0, 4.8, 0.9$  Hz, 1H), 7.35 – 7.30 (m, 2H), 7.28 – 7.23 (m, 3H), 4.29 (s, 2H).  $^{13}C$  NMR (100 MHz,  $CDCl_3$ )  $\delta$  196.3, 153.4, 150.0, 135.8, 133.4, 131.7, 129.3, 128.7, 127.1, 123.6, 45.7.

**2-phenyl-1-(thiophen-2-yl)ethan-1-one (3o)<sup>9</sup>:**

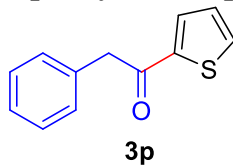

3p

The title compound was obtained as a yellow oil. Yield 30% (30 mg).  $R_f$  (10% EtOAc/Hexane): 0.24.  $^1H$  NMR (400 MHz,  $CDCl_3$ )  $\delta$  7.78 (dd,  $J = 3.8, 1.1$  Hz, 1H), 7.63 (dd,  $J = 5.0, 1.1$  Hz, 1H), 7.37 – 7.30 (m, 4H), 7.29 – 7.24 (m, 1H), 7.12 (dd,  $J = 5.0, 3.8$  Hz, 1H), 4.20 (s, 2H).  $^{13}C$

NMR (100 MHz, CDCl<sub>3</sub>)  $\delta$  190.4, 143.8, 134.2, 133.9, 132.6, 129.3, 128.6, 128.1, 126.9, 46.2.

**1-(4-fluorophenyl)-2-phenylpropan-1-one (3l)<sup>10</sup>:**

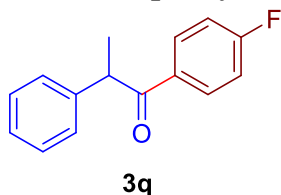

The title compound was obtained as a light-yellow liquid. Yield 61% (69 mg).  $R_f$  (5% EtOAc/Hexane): 0.2. <sup>1</sup>H NMR (500 MHz, CDCl<sub>3</sub>)  $\delta$  8.01 – 7.93 (m, 2H), 7.31 – 7.24 (m, 4H), 7.22 – 7.17 (m, 1H), 7.02 (t,  $J$  = 8.7 Hz, 2H), 4.62 (q,  $J$  = 6.8 Hz, 1H), 1.52 (d,  $J$  = 6.8 Hz, 3H). <sup>13</sup>C NMR (125 MHz, CDCl<sub>3</sub>)  $\delta$  198.6, 165.3 (d,  $J$  = 252.5 Hz), 141.3, 131.3 (d,  $J$  = 8.75 Hz), 129.0, 126.9, 115.5 (d,  $J$  = 21.45 Hz), 47.9, 19.4.

**1-(4-methoxyphenyl)-2-(p-tolyl)ethan-1-one (4a)<sup>7</sup>:**

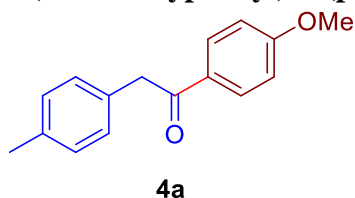

The title compound was obtained as a colourless solid. Yield 87% (104 mg), mp 89–91 °C.  $R_f$  (5% EtOAc/Hexane): 0.4. <sup>1</sup>H NMR (500 MHz, CDCl<sub>3</sub>)  $\delta$  7.99 (d,  $J$  = 8.9 Hz, 2H), 7.16 – 7.11 (m, 4H), 6.92 (d,  $J$  = 8.9 Hz, 2H), 4.19 (s, 2H), 3.86 (s, 3H), 2.32 (s, 3H). <sup>13</sup>C NMR (125 MHz, CDCl<sub>3</sub>)  $\delta$  196.4, 163.3, 136.2, 131.7, 130.8, 129.5, 129.2, 129.1, 113.6, 55.3, 44.8, 20.9.

**2-(4-isopropylphenyl)-1-phenylethan-1-one (4b):**

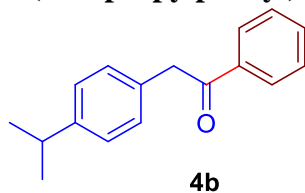

The title compound was obtained as a colourless solid. Yield 83% (99 mg), mp 85–87 °C.  $R_f$  (5% EtOAc/Hexane): 0.45. <sup>1</sup>H NMR (500 MHz, CDCl<sub>3</sub>)  $\delta$  8.01 (dd,  $J$  = 8.3, 1.2 Hz, 2H), 7.57 – 7.48 (m, 1H), 7.48 – 7.38 (m, 2H), 7.20 – 7.17 (m, 4H), 4.24 (s, 2H), 2.93 – 2.80 (m, 1H), 1.22 (d,  $J$  = 6.9 Hz, 6H). <sup>13</sup>C NMR (125 MHz, CDCl<sub>3</sub>)  $\delta$  197.7, 147.3, 136.5, 133.0, 131.6, 129.5, 129.3, 129.0, 128.5, 128.5, 127.0, 126.6, 126.5, 44.9, 33.6, 23.9. HRMS (ESI):  $m/z$  [M + H]<sup>+</sup> calculated for : C<sub>17</sub>H<sub>19</sub>O: 239.1436; found: 239.1463. IR:(KBr)  $\nu_{max}$  3034, 1679, 1600, 1249, 1121, 922, 806, 757, 698, 569 cm<sup>-1</sup>.

**2-(4-nitrophenyl)-1-phenylethan-1-one (4c)<sup>1</sup>:**

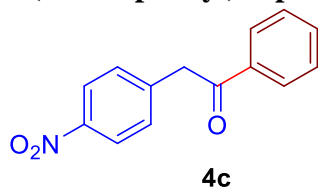

The title compound was obtained as a yellow solid. Yield 81% (96 mg), mp 132–134 °C.  $R_f$  (5% EtOAc/Hexane): 0.25. <sup>1</sup>H NMR (500 MHz, CDCl<sub>3</sub>)  $\delta$  8.23 – 8.18 (m, 2H), 8.01 (dd,  $J$  = 8.4, 1.2 Hz, 2H), 7.64 – 7.59 (m, 1H), 7.53 – 7.48 (m, 2H), 7.46 – 7.41 (m, 2H), 4.42 (s, 2H). <sup>13</sup>C NMR (125 MHz, CDCl<sub>3</sub>)  $\delta$  195.9, 147.0, 141.9, 136.1, 133.7, 130.6, 128.8, 128.4, 123.7, 44.9.

**1-(4-methoxyphenyl)-2-(4-(trifluoromethyl)phenyl)ethan-1-one (4d)<sup>11</sup>:**

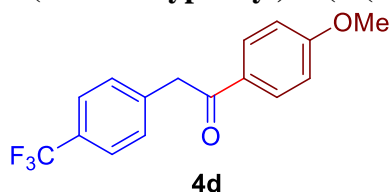

The title compound was obtained as a colourless solid. Yield 79% (116 mg), mp 124–126 °C.  $R_f$  (10% EtOAc/Hexane): 0.37. <sup>1</sup>H NMR (500 MHz, CDCl<sub>3</sub>)  $\delta$  8.02 – 7.98 (m, 2H), 7.58 (d,  $J$  = 8.1 Hz, 2H), 7.38 (d,  $J$  = 8.0 Hz, 2H), 6.98 – 6.93 (m, 2H), 4.30 (s, 2H), 3.88 (s,

3H).  $^{13}\text{C}$  NMR (125 MHz,  $\text{CDCl}_3$ )  $\delta$  195.1, 163.7, 138.8, 130.7, 129.8, 129.0 (q,  $J = 33.5$  Hz), 125.4 (q,  $J = 3.75$  Hz), 113.8, 55.4, 44.7.

#### 2-(4-fluorophenyl)-1-phenylethan-1-one (4e)<sup>1</sup>:

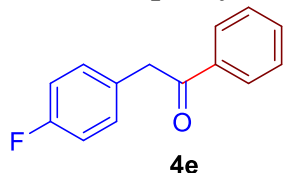

The title compound was obtained as a colourless liquid. Yield 84% (90 mg).  $R_f$  (5% EtOAc/Hexane): 0.26.  $^1\text{H}$  NMR (500 MHz,  $\text{CDCl}_3$ )  $\delta$  8.01 (dd,  $J = 8.3, 1.2$  Hz, 2H), 7.60 – 7.55 (m, 1H), 7.48 (t,  $J = 7.7$  Hz, 2H), 7.23 (dd,  $J = 8.7, 5.4$  Hz, 2H), 7.06 – 6.99 (m, 2H), 4.27 (s, 2H).  $^{13}\text{C}$  NMR (125 MHz,  $\text{CDCl}_3$ )  $\delta$  197.3, 161.8 (d,  $J = 242.5$  Hz), 136.4, 133.2, 131.0 (d,  $J = 7.5$  Hz), 130.1 (d,  $J = 3.75$  Hz), 128.6, 128.4, 115.4 (d,  $J = 21.25$  Hz), 44.4.

#### 2-(4-bromophenyl)-1-(4-methoxyphenyl)ethan-1-one (4f)<sup>7</sup>:

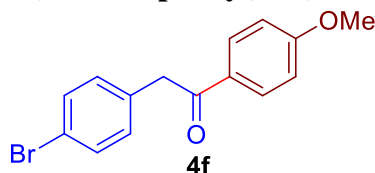

The title compound was obtained as a light yellow solid. Yield 88% (133 mg), mp 135–137 °C.  $R_f$  (5% EtOAc/Hexane): 0.36.  $^1\text{H}$  NMR (500 MHz,  $\text{CDCl}_3$ )  $\delta$  7.98 (d,  $J = 8.9$  Hz, 2H), 7.44 (d,  $J = 8.4$  Hz, 2H), 7.14 (d,  $J = 8.4$  Hz, 2H), 6.94 (d,  $J = 8.9$  Hz, 2H), 4.19 (s, 2H), 3.86 (s, 3H).  $^{13}\text{C}$  NMR (125 MHz,  $\text{CDCl}_3$ )  $\delta$  195.4, 163.5, 133.7, 131.5, 131.1, 130.7, 129.2, 120.7, 113.7, 55.4, 44.3.

#### 2-(3-bromophenyl)-1-(4-methoxyphenyl)ethan-1-one (4g):

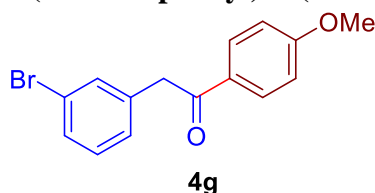

The title compound was obtained as a light yellow solid. Yield 86% (130 mg), mp 118–120 °C.  $R_f$  (5% EtOAc/Hexane): 0.32.  $^1\text{H}$  NMR (500 MHz,  $\text{CDCl}_3$ )  $\delta$  7.98 (d,  $J = 8.9$  Hz, 2H), 7.43 (s, 1H), 7.40 – 7.34 (m, 1H), 7.19 (dd,  $J = 4.1, 1.6$  Hz, 2H), 6.94 (d,  $J = 8.9$  Hz, 2H), 4.20 (s, 2H), 3.87 (s, 3H).  $^{13}\text{C}$  NMR (125 MHz,  $\text{CDCl}_3$ )  $\delta$  195.3, 163.6, 137.0, 132.4, 130.8, 130.0, 129.9, 129.3, 128.1, 122.5, 113.8, 55.4, 44.5. HRMS (ESI):  $m/z$   $[\text{M} + \text{H}]^+$  calculated for :  $\text{C}_{15}\text{H}_{14}\text{BrO}_2$ : 305.0177; found: 305.0195. IR:(KBr)  $\nu_{\text{max}}$  2963, 1670, 1602, 1254, 990, 845, 745, 702, 668, 555  $\text{cm}^{-1}$ .

#### 2-(2-bromophenyl)-1-(4-methoxyphenyl)ethan-1-one (4h)<sup>12</sup>:

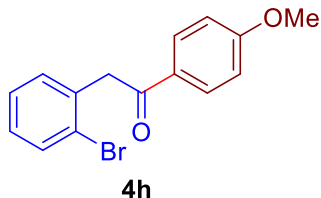

The title compound was obtained as a colourless solid. Yield 70% (106 mg), mp 66–68 °C.  $R_f$  (5% EtOAc/Hexane): 0.35.  $^1\text{H}$  NMR (500 MHz,  $\text{CDCl}_3$ )  $\delta$  8.07 – 8.01 (m, 2H), 7.66 – 7.54 (m, 1H), 7.30 – 7.23 (m, 2H), 7.17 – 7.12 (m, 1H), 6.98 – 6.94 (m, 2H), 4.41 (s, 2H), 3.88 (s, 3H).  $^{13}\text{C}$  NMR (125 MHz,  $\text{CDCl}_3$ )  $\delta$  194.9, 163.6, 135.2, 132.7, 131.6, 130.6, 129.6, 128.5, 127.4, 125.0, 113.8, 55.4, 45.3.

#### 1-(4-methoxyphenyl)-2-(2-nitrophenyl)ethan-1-one (4i)<sup>13</sup>:



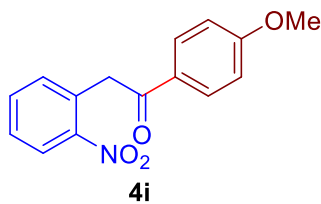

The title compound was obtained as a yellow solid. Yield 67% (91 mg), mp 113–115 °C.  $R_f$  (20% EtOAc/Hexane): 0.6.  $^1\text{H NMR}$  (500 MHz,  $\text{CDCl}_3$ )  $\delta$  8.11 (d,  $J = 8.2$  Hz, 1H), 8.03 – 7.97 (m, 2H), 7.57 (t,  $J = 7.5$  Hz, 1H), 7.45 (t,  $J = 7.8$  Hz, 1H), 7.32 (d,  $J = 7.6$  Hz, 1H), 6.95 (dd,  $J = 8.7, 1.3$  Hz, 2H), 4.67 (s, 2H), 3.85 (s, 3H).  $^{13}\text{C NMR}$  (125 MHz,  $\text{CDCl}_3$ )  $\delta$  193.7, 163.6, 148.9, 133.5, 133.3, 130.7, 130.41, 129.3, 128.1, 125.0, 113.7, 55.4, 43.5.

**2-(2-nitrophenyl)-1-(p-tolyl)ethan-1-one (4j)<sup>1</sup>:**

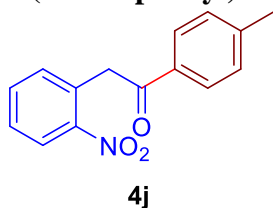

The title compound was afforded as a yellow solid. Yield 65% (83 mg), mp 78–80 °C.  $R_f$  (10% EtOAc/Hexane): 0.35.  $^1\text{H NMR}$  (500 MHz,  $\text{CDCl}_3$ )  $\delta$  8.14 (d,  $J = 8.2$  Hz, 1H), 7.94 (d,  $J = 8.2$  Hz, 2H), 7.60 (td,  $J = 7.5, 1.1$  Hz, 1H), 7.47 (dd,  $J = 11.2, 4.5$  Hz, 1H), 7.34 (d,  $J = 7.6$  Hz, 1H), 7.30 (d,  $J = 7.9$  Hz, 2H), 4.71 (s, 2H), 2.43 (s, 3H).  $^{13}\text{C NMR}$  (125 MHz,  $\text{CDCl}_3$ )  $\delta$  194.8, 149.0, 144.3, 133.9, 133.5, 133.3, 130.7, 129.3, 128.3, 128.2, 125.1, 43.9, 21.6.

**2-phenyl-1H-indole (6a)<sup>1</sup>:**

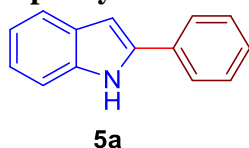

The title compound was afforded as a light yellow solid. Yield 77% (75 mg), mp 180–182 °C.  $R_f$  (5% EtOAc/Hexane): 0.45.  $^1\text{H NMR}$  (600 MHz,  $\text{CDCl}_3$ )  $\delta$  8.37 (s, 1H), 7.68 – 7.64 (m, 3H), 7.47 – 7.41 (m, 3H), 7.34 (t,  $J = 7.4$  Hz, 1H), 7.21 (d,  $J = 7.3$  Hz, 1H), 7.14 (t,  $J = 7.4$  Hz, 1H), 6.84 (s, 1H).  $^{13}\text{C NMR}$  (150 MHz,  $\text{CDCl}_3$ )  $\delta$  137.8, 136.8, 132.3, 129.2, 129.0, 127.7, 125.1, 122.3, 120.6, 120.2, 110.9, 99.9.

**1,2-bis(4-methoxyphenyl)ethan-1-one<sup>14</sup>:**

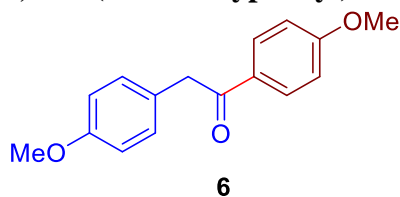

The title compound was afforded as a colourless solid. Yield 79% (202 mg), mp 110–112 °C.  $R_f$  (5% EtOAc/Hexane): 0.33.  $^1\text{H NMR}$  (400 MHz,  $\text{CDCl}_3$ )  $\delta$  7.99 (d,  $J = 8.8$  Hz, 2H), 7.18 (d,  $J = 8.5$  Hz, 2H), 6.96 – 6.89 (m, 2H), 6.88 – 6.82 (m, 2H), 4.17 (s, 2H), 3.86 (s, 3H), 3.78 (s, 3H).  $^{13}\text{C NMR}$  (100 MHz,  $\text{CDCl}_3$ )  $\delta$  196.5, 163.4, 158.4, 130.8, 130.3, 129.6, 126.9, 114.0, 113.7, 55.4, 55.2, 44.3.

**1,2-bis(4-methoxyphenyl)ethane-1,2-dione<sup>15</sup>:**

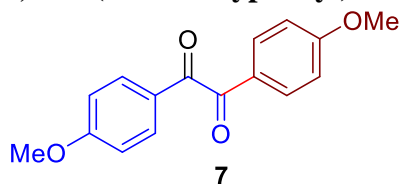

The title compound was afforded as a light yellow solid. Yield 90% (142 mg), mp 125–127 °C.  $R_f$  (5% EtOAc/Hexane): 0.4.  $^1\text{H NMR}$  (400 MHz,  $\text{CDCl}_3$ )  $\delta$  7.96 – 7.92 (m, 2H), 6.98 – 6.94 (m, 2H), 3.87 (s, 3H).  $^{13}\text{C NMR}$  (100 MHz,  $\text{CDCl}_3$ )  $\delta$  193.4, 164.8, 132.3, 126.2, 114.2, 55.5.

**2-(2,4-difluorophenyl)-4,5-bis(4-methoxyphenyl)-1H-imidazole<sup>3</sup>:**

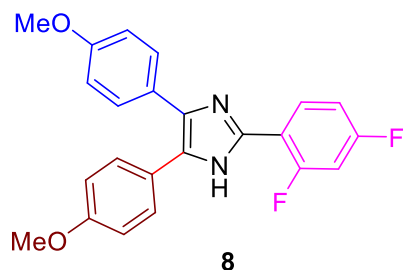

The title compound was afforded as a colourless liquid. Yield 76% (106 mg).  $R_f$  (30% EtOAc/Hexane): 0.4.  $^1\text{H NMR}$  (400 MHz,  $\text{CDCl}_3$ )  $\delta$  8.42 – 8.36(m, 1H), 7.47 (d,  $J$  = 8.2 Hz, 4H), 7.04 – 6.99 (m, 1H), 6.96 – 6.86 (m, 5H), 3.83 (s, 6H).  $^{13}\text{C NMR}$  (100 MHz,  $\text{CDCl}_3$ )  $\delta$  163.8 (d,  $J$  = 12.6 Hz), 161.3 (d,  $J$  = 12.5 Hz), 160.5 (d,  $J$  = 11.6 Hz), 159.0, 158.0 (d,  $J$  = 11.7 Hz), 139.8, 129.9 (dd,  $J$  = 9.4, 5.0 Hz), 129.0, 114.0, 112.5 (d,  $J$  = 21 Hz), 104.2 (t,  $J$  = 26 Hz), 55.2. HRMS (ESI):  $m/z$   $[\text{M} + \text{H}]^+$  calculated for :  $\text{C}_{23}\text{H}_{19}\text{F}_2\text{N}_2\text{O}_2$ : 393.1415; found: 393.1421

### methyl 3-(4,5-diphenyloxazol-2-yl)propanoate<sup>16</sup>:

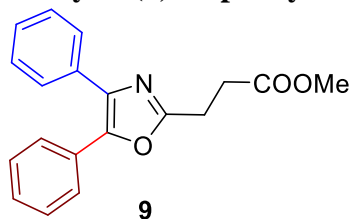

The title compound was afforded as a colourless solid. Yield 81% (111 mg), mp 60–62 °C.  $R_f$  (20% EtOAc/Hexane): 0.3.  $^1\text{H NMR}$  (400 MHz,  $\text{CDCl}_3$ )  $\delta$  7.67 – 7.60 (m, 2H), 7.60 – 7.52 (m, 2H), 7.40 – 7.28 (m, 6H), 3.74 (s, 3H), 3.19 (t,  $J$  = 7.6 Hz, 2H), 2.92 (t,  $J$  = 7.6 Hz, 2H).  $^{13}\text{C NMR}$  (100 MHz,  $\text{CDCl}_3$ )  $\delta$  172.4, 161.6, 135.1, 132.4, 128.9, 128.6, 128.5, 128.4, 128.0, 127.8, 126.4, 51.9, 30.9, 23.5. HRMS (ESI):  $m/z$   $[\text{M} + \text{H}]^+$  calculated for :  $\text{C}_{19}\text{H}_{18}\text{NO}_3$ : 308.1287; found: 308.1291

### 3-(4,5-diphenyloxazol-2-yl)propanoic acid<sup>16</sup>:

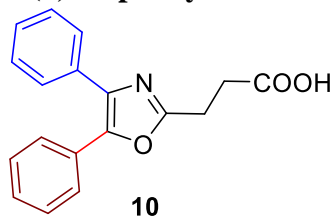

The title compound was afforded as a colourless solid. Yield 88% (75 mg), mp 153–155 °C.  $R_f$  (10% MeOH/ $\text{CHCl}_3$ ): 0.32.  $^1\text{H NMR}$  (400 MHz,  $\text{CDCl}_3$ )  $\delta$  9.16 (s, 1H), 7.66 – 7.60 (m, 2H), 7.59 – 7.54 (m, 2H), 7.40 – 7.28 (m, 6H), 3.21 (t,  $J$  = 7.4 Hz, 2H), 2.95 (t,  $J$  = 7.4 Hz, 2H).  $^{13}\text{C NMR}$  (100 MHz,  $\text{CDCl}_3$ )  $\delta$  176.6, 161.8, 145.5, 134.8, 132.0, 128.7, 128.6, 128.5, 128.5, 128.1, 127.9, 126.4, 30.8, 23.2. HRMS (ESI):  $m/z$   $[\text{M} + \text{H}]^+$  calculated for :  $\text{C}_{18}\text{H}_{16}\text{NO}_3$ : 294.1130; found: 294.1133

## 3. References

- [1] R. Venkatesh, A. K. Singh, Y. R. Lee, J. Kandasamy, *Org. Biomol. Chem.* 2021, **19**, 7832-7837.
- [2] T. Hostier, Z. Neouchy, V. Ferey, D. Gomez Pardo, J. Cossy, *J. Org. Lett.* 2018, **20**, 1815-1818.
- [3] A. H. Bansode and G. Suryavanshi, *ACS Omega*, 2019, **4**, 9636-9644.
- [4] S. Chierle, A. Chaikuad, F. F. Lillich, X. Ni, S. Woltersdorf, E. Schallmayer, B. Renelt, R. Ronchetti, S. Knapp, E. Proschak, D. Merk, *J. Med. Chem.*, 2021, **64**, 5123–5136.
- [5] M. Bouquin, F. Jaroschik, M. Taillefer, *Tetrahedron Lett.* 2021, **75**, 153208.
- [6] Y. Ding, W. Zhang, H. Li, Y. Meng, T. Zhang, Q. Y. Chen, C. Zhu, *Green Chem.* 2017, **19**, 2941-2944.
- [7] M. Jacubert, O. Provot, J. F. Peyrat, A. Hamze, J. D. Brion, M. Alami, *Tetrahedron*, 2010, **66**, 3775-3787.
- [8] H. Wang, J. Y. Mao, S. J. Shuai, S. G. Chen, D. Zou, P. J. Walsh, J. Li, *Org. Chem. Front.* 2021, **8**, 6000-6008.

- [9] I. Astarloa, R. SanMartin, M.T. Herrero, E. Dominguez, *Adv. Synth. Catal.* 2018, **360**, 1711–1718.
- [10] X. Wei, K. Wang, W. Fang, *Org. Biomol. Chem.* 2023, **21**, 3858-3862.
- [11] D. Wang, Z. Zhang, *Org. Lett.* 2003, **5**, 4645-4648.
- [12] E. Speckmeier, C. Padie, K. Zeitler, *Org. Lett.* 2015, **17**, 4818-4821.
- [13] D. Felipe-Blanco, J. C. Gonzalez-Gomez, *Adv. Synth. Catal.* 2018, **360**, 2773-2778.
- [14] X. Chen, Z. Chen and C. M. So, *J. Org. Chem.*, 2019, **84**, 6337–6346.
- [15] C. Qi, H. Jiang, L. Huang, Z. Chen and H. Chen, *Synthesis*, 2011, **2011**, 387-396.
- [16] Y. Zheng, X. Li, C. Ren, D. Zhang-Negrerie, Y. Du and K. Zhao, *J. Org. Chem.*, 2012, **77**, 10353–10361.

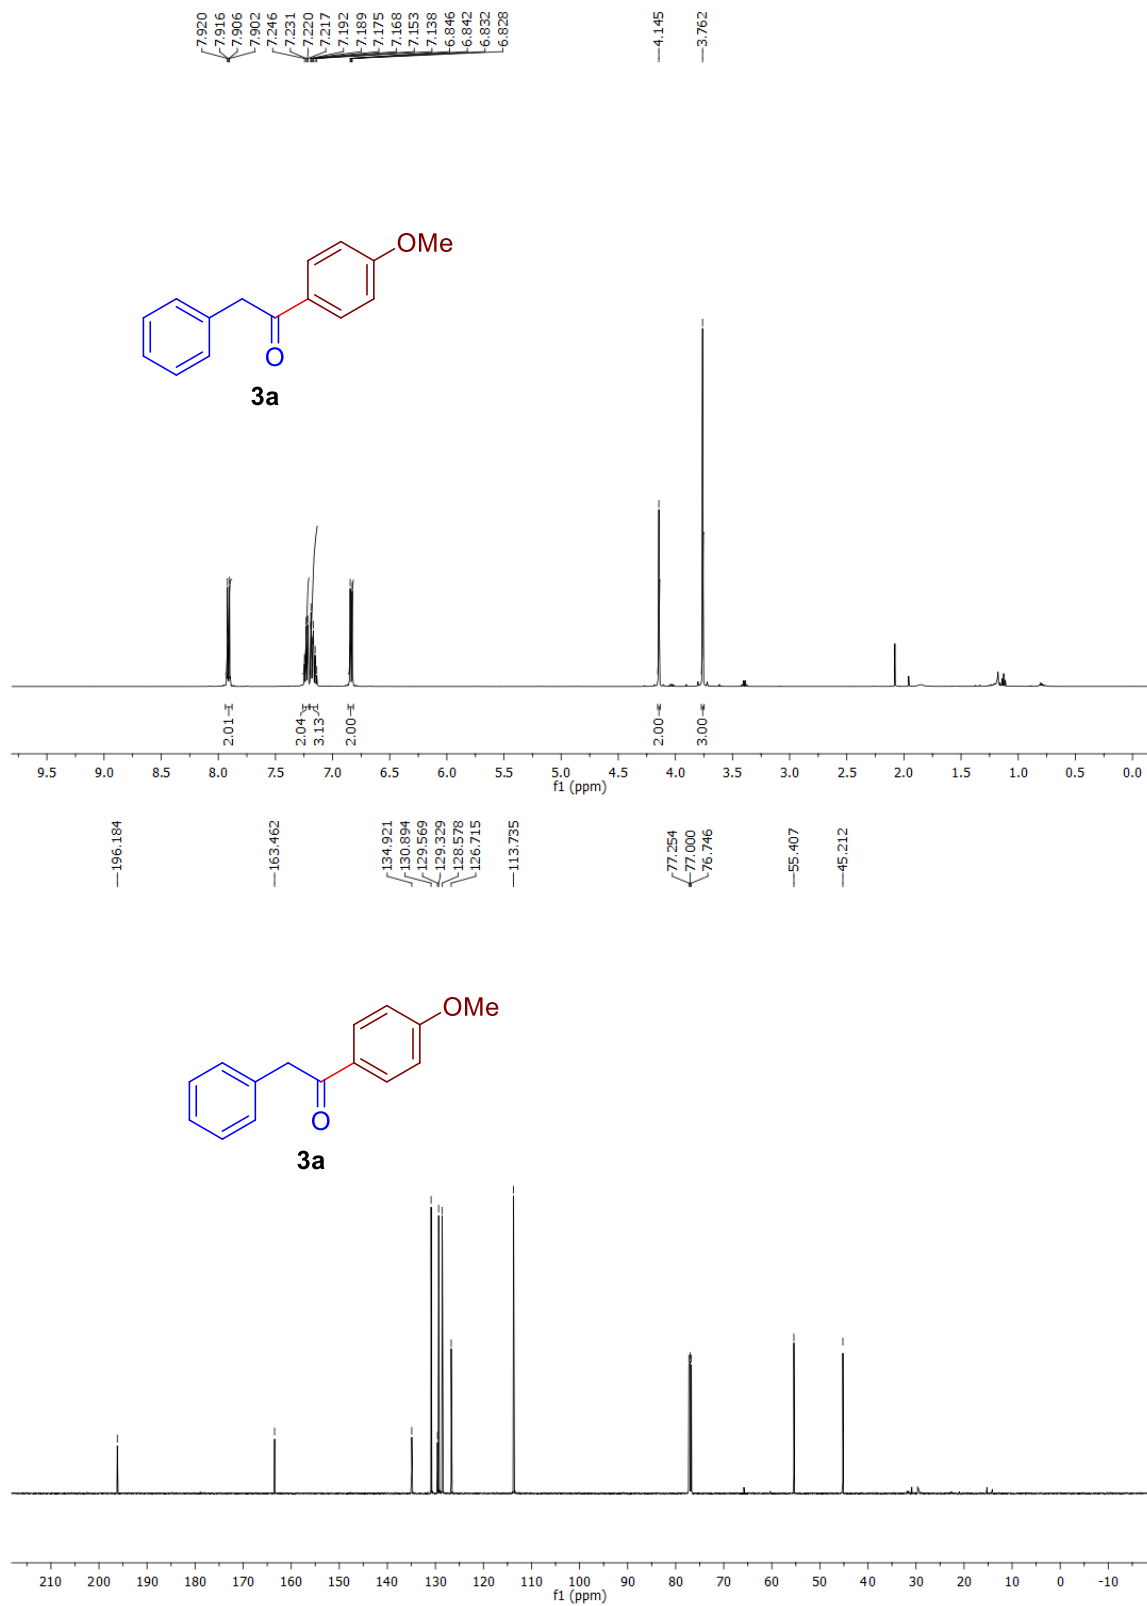

**Figure 5.1.** <sup>1</sup>H NMR (500 MHz) and <sup>13</sup>C NMR (125 MHz) Spectra of (**3a**) in CDCl<sub>3</sub>

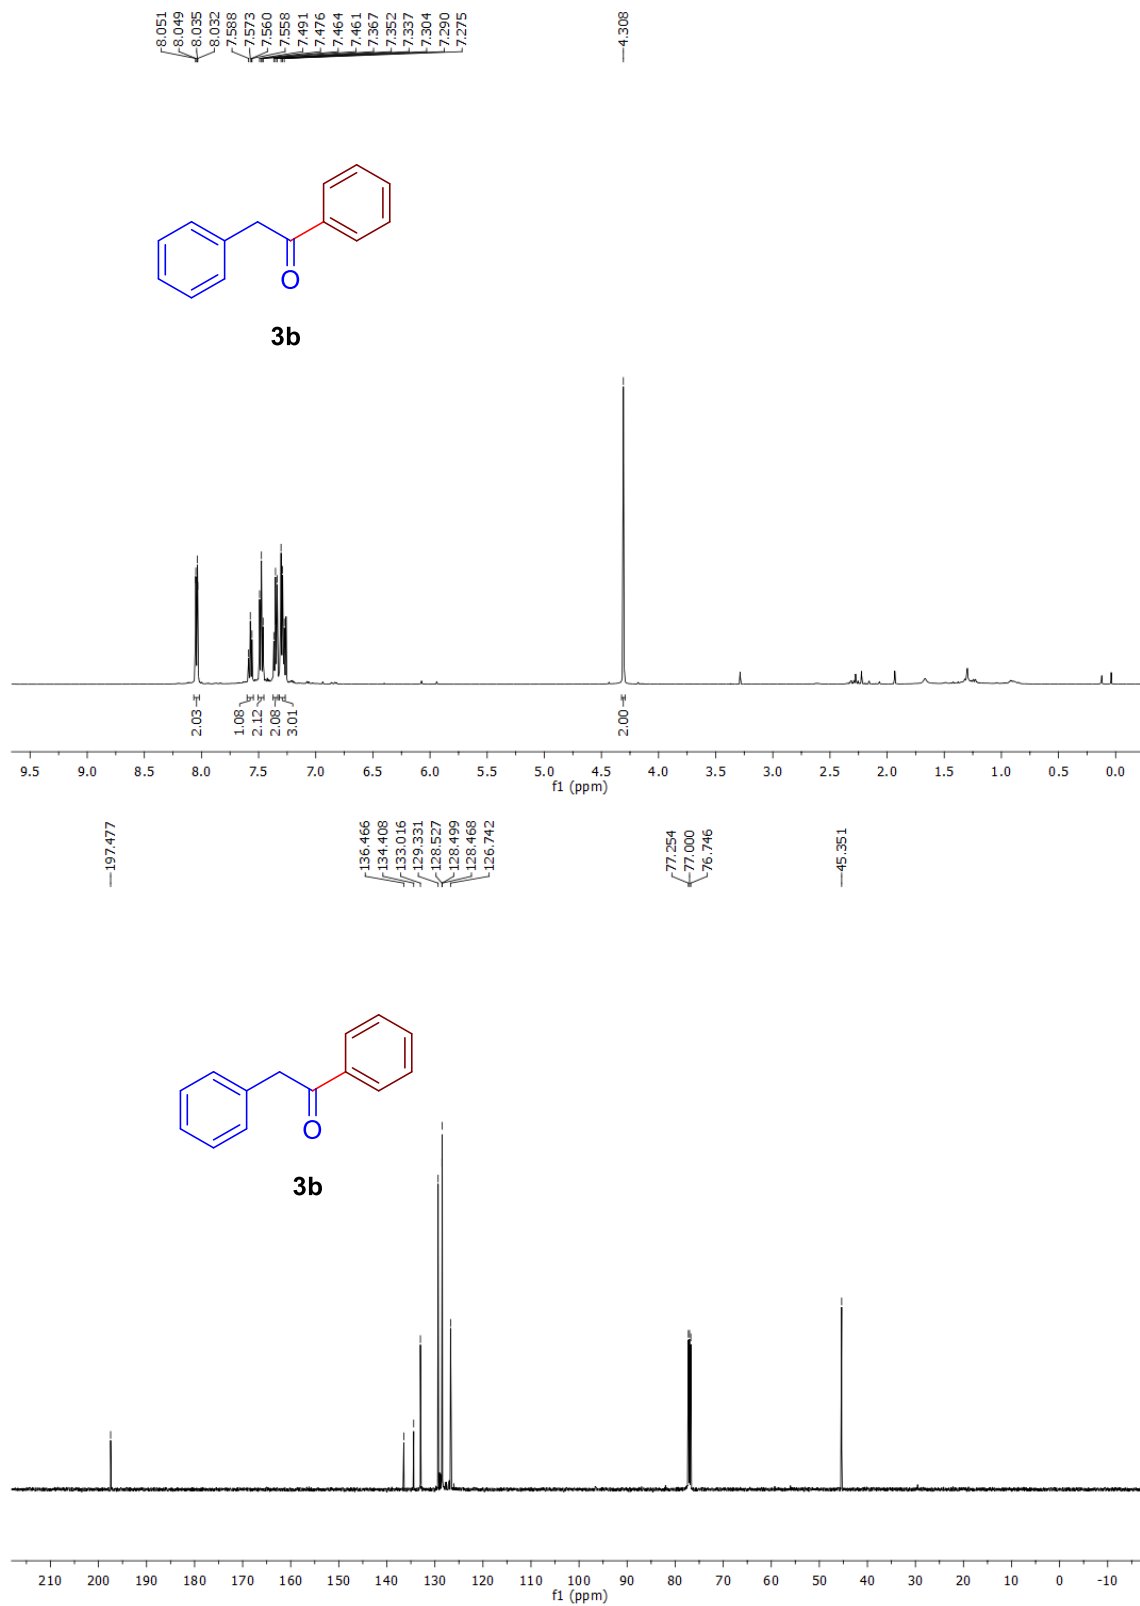

**Figure 5.2.** <sup>1</sup>H NMR (500 MHz) and <sup>13</sup>C NMR (125 MHz) Spectra of (3b) in CDCl<sub>3</sub>.

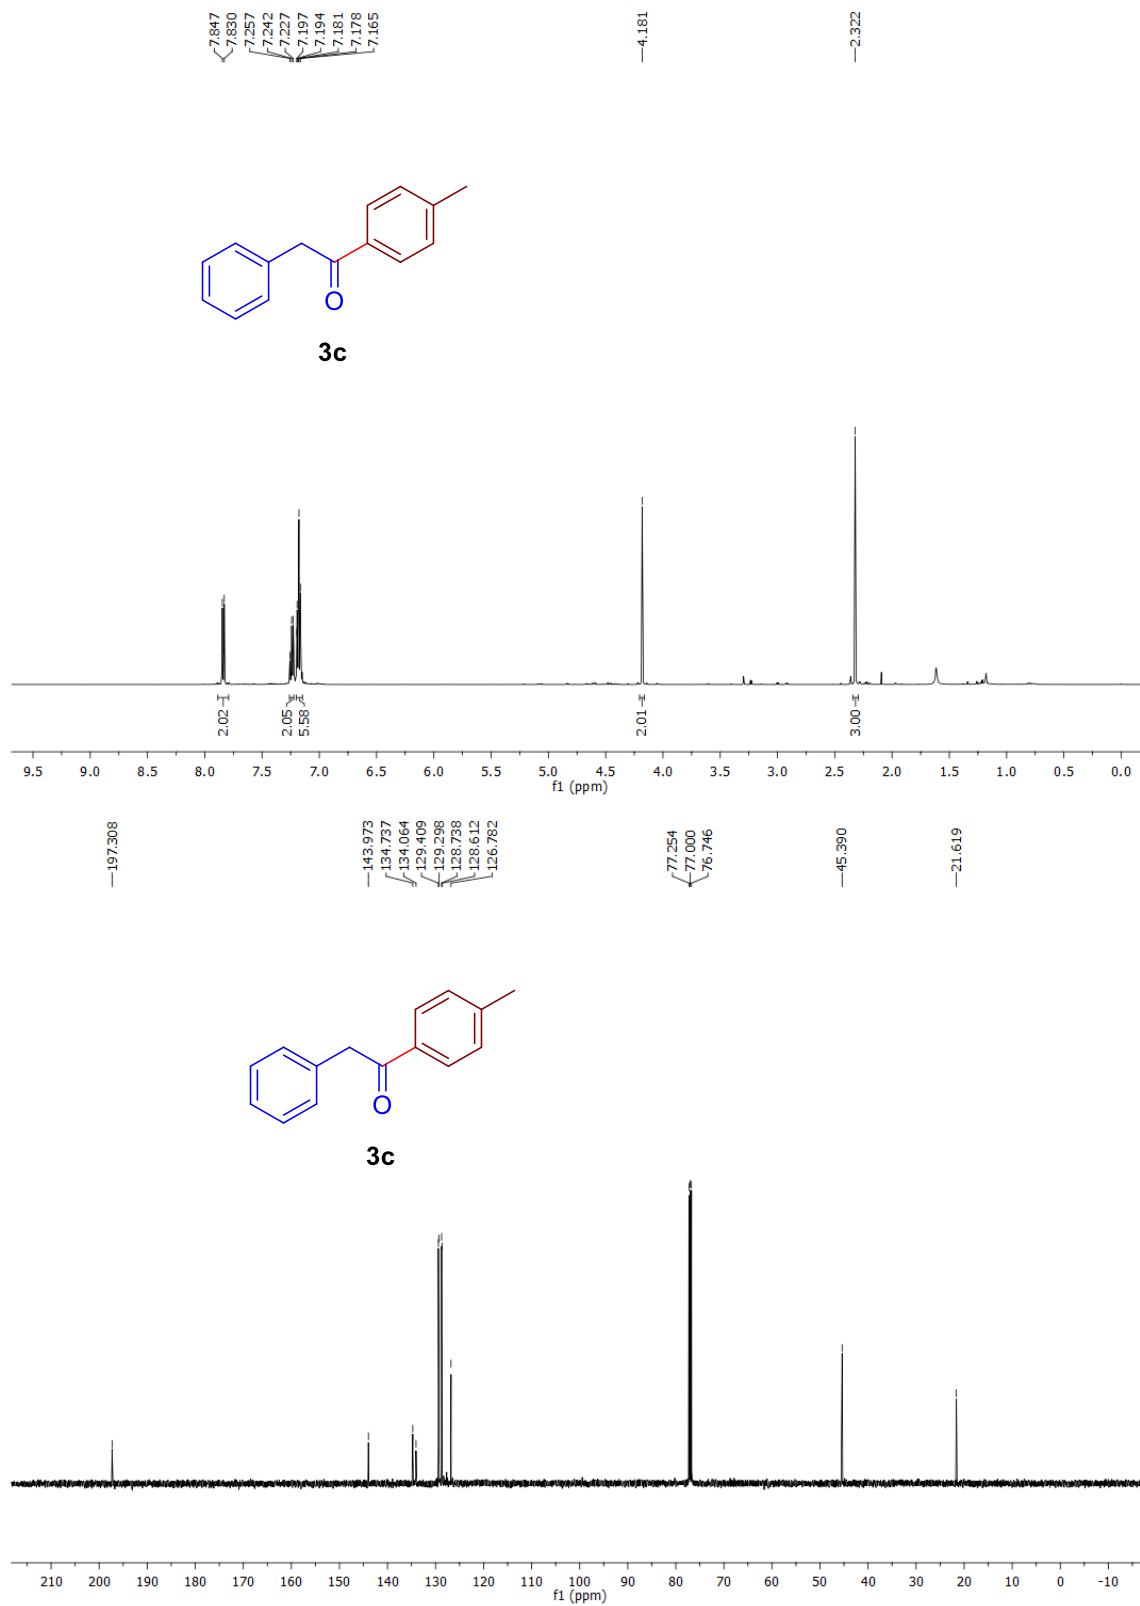

**Figure 5.3.** <sup>1</sup>H NMR (500 MHz) and <sup>13</sup>C NMR (125 MHz) Spectra of (3c) in CDCl<sub>3</sub>.

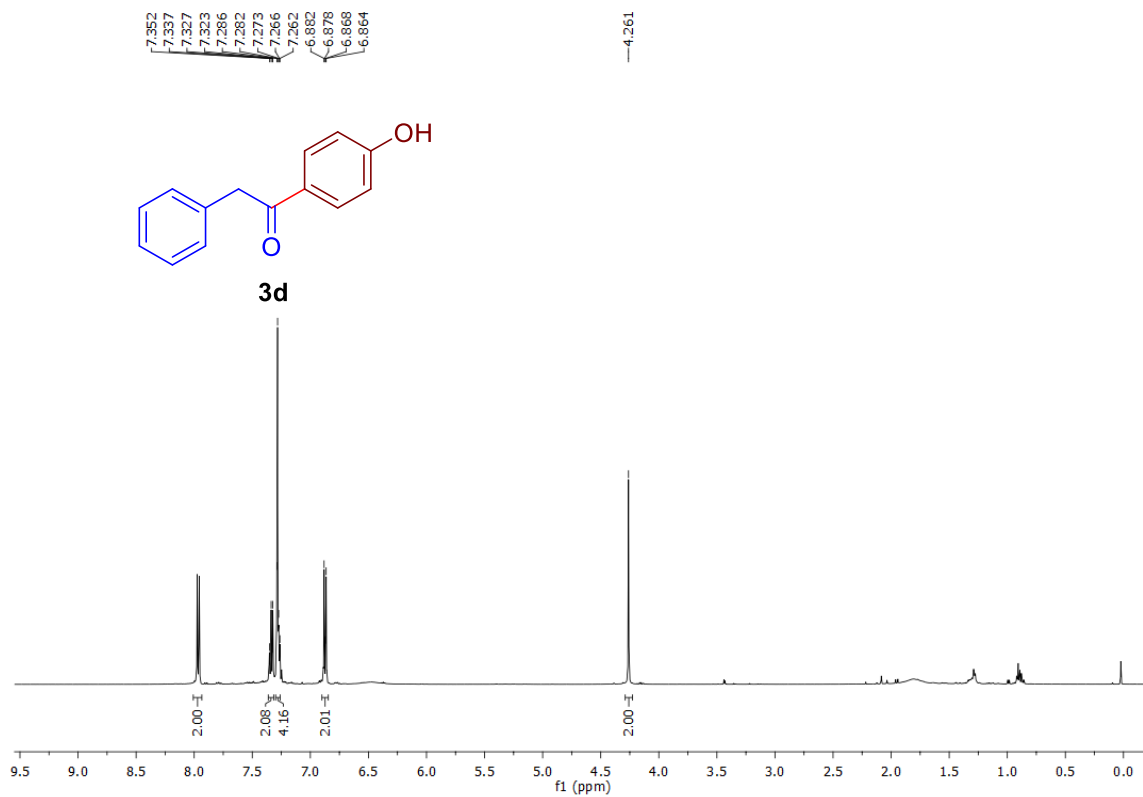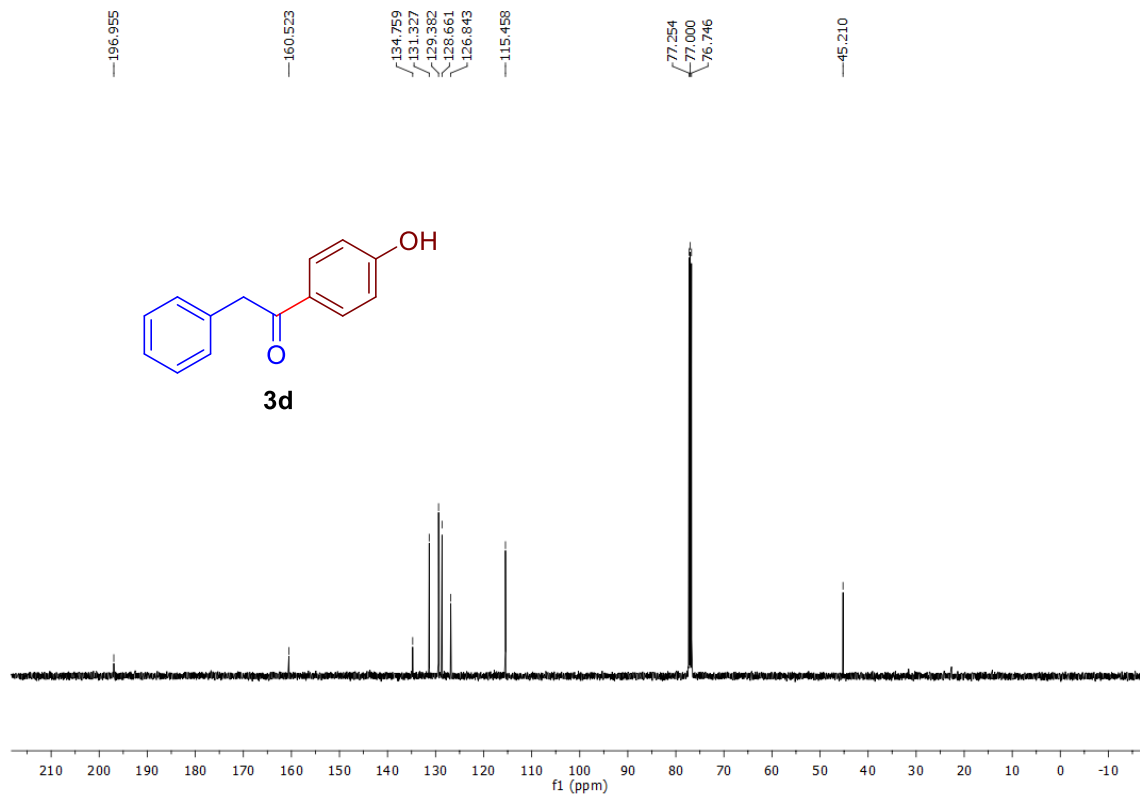

**Figure 5.4.** <sup>1</sup>H NMR (500 MHz) and <sup>13</sup>C NMR (125 MHz) Spectra of (**3d**) in CDCl<sub>3</sub>.

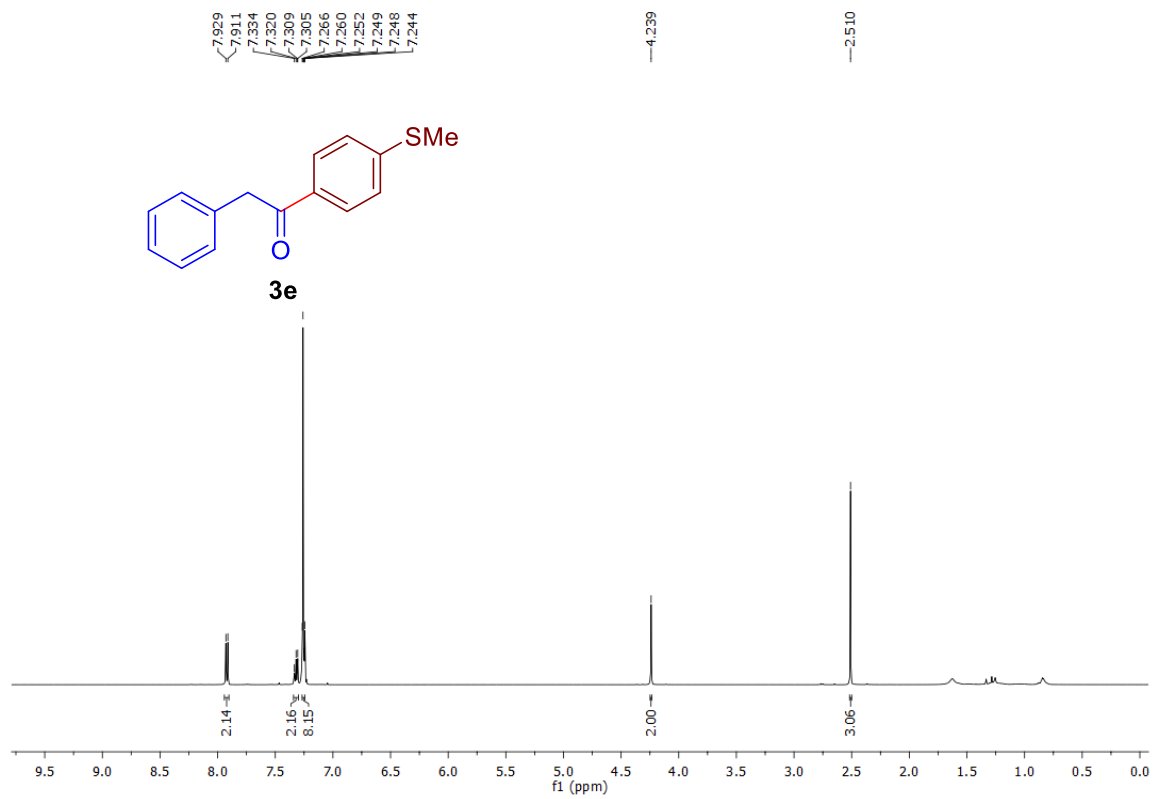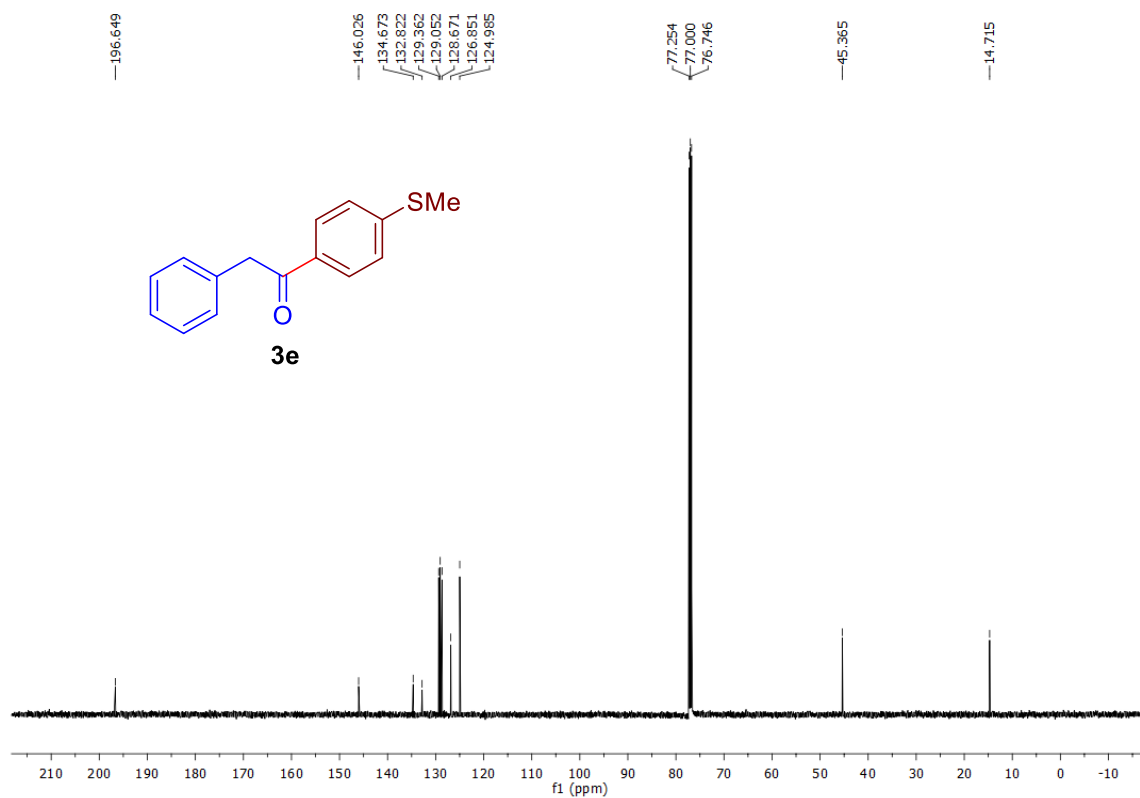

Figure 5.5. <sup>1</sup>H NMR (500 MHz) and <sup>13</sup>C NMR (125 MHz) Spectra of (**3e**) in CDCl<sub>3</sub>.



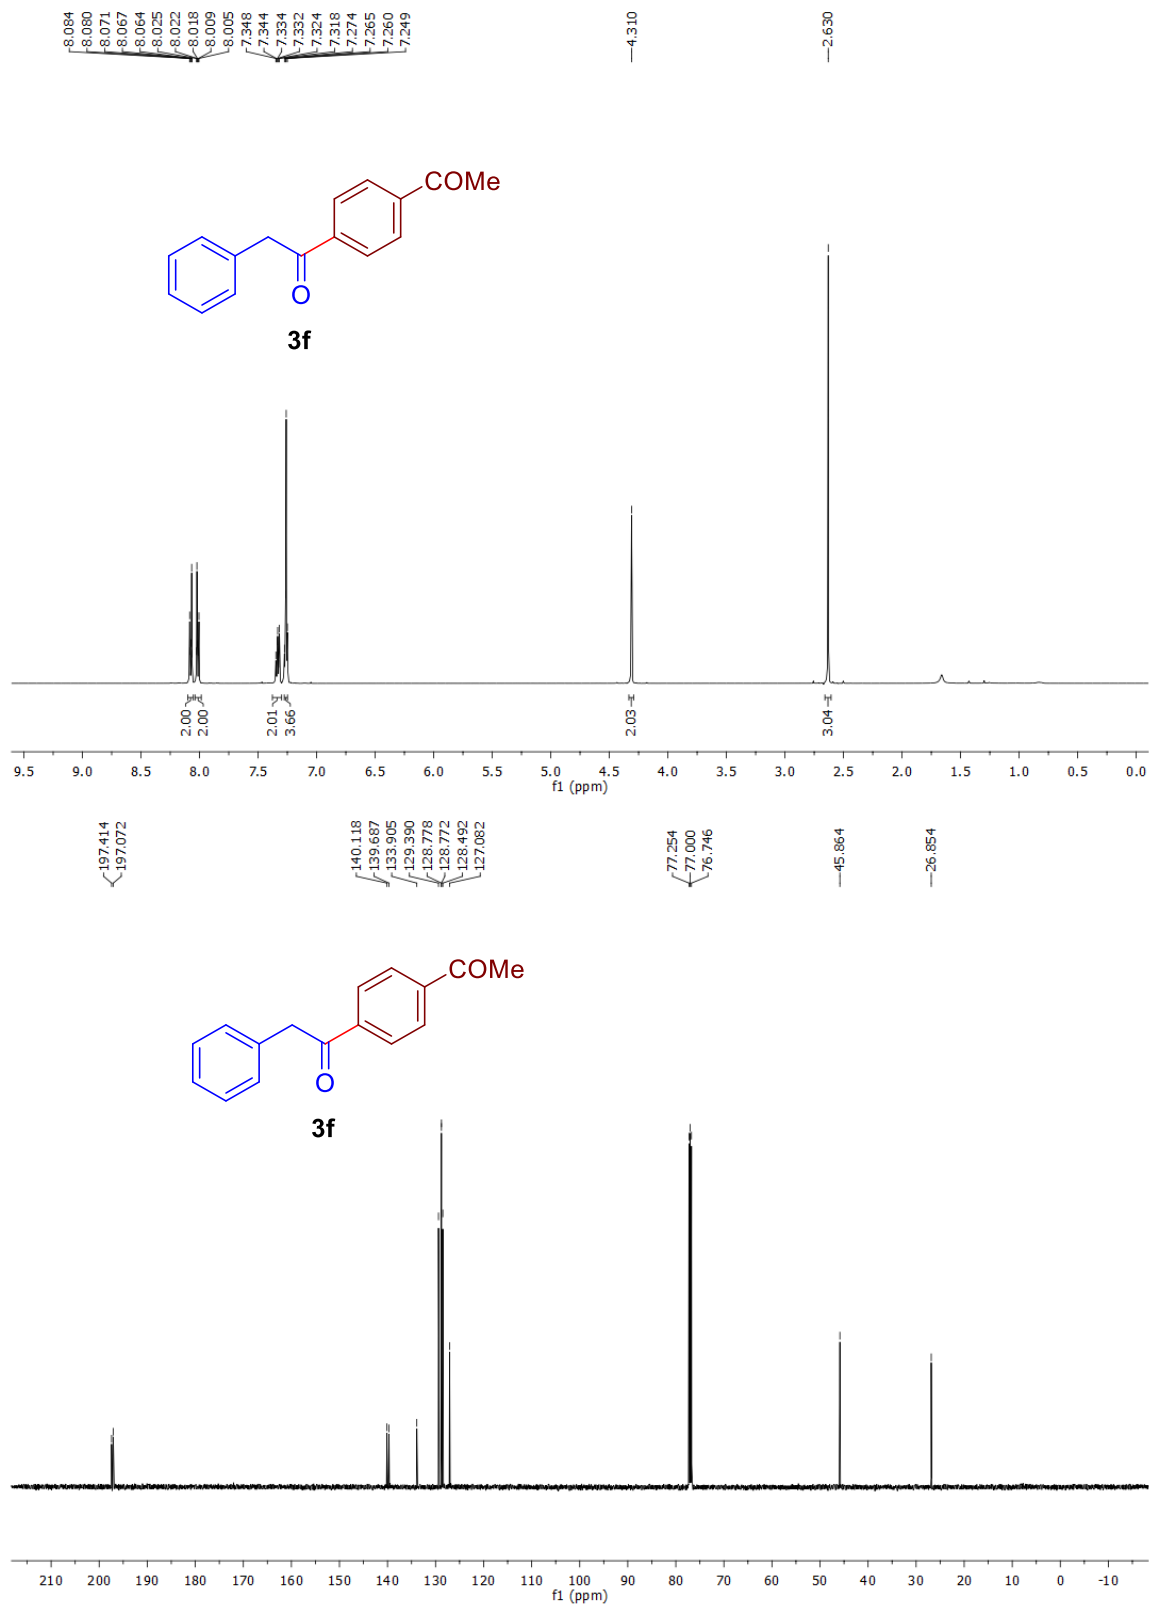

Figure 5.6. <sup>1</sup>H NMR (500 MHz) and <sup>13</sup>C NMR (125 MHz) Spectra of (**3f**) in CDCl<sub>3</sub>.

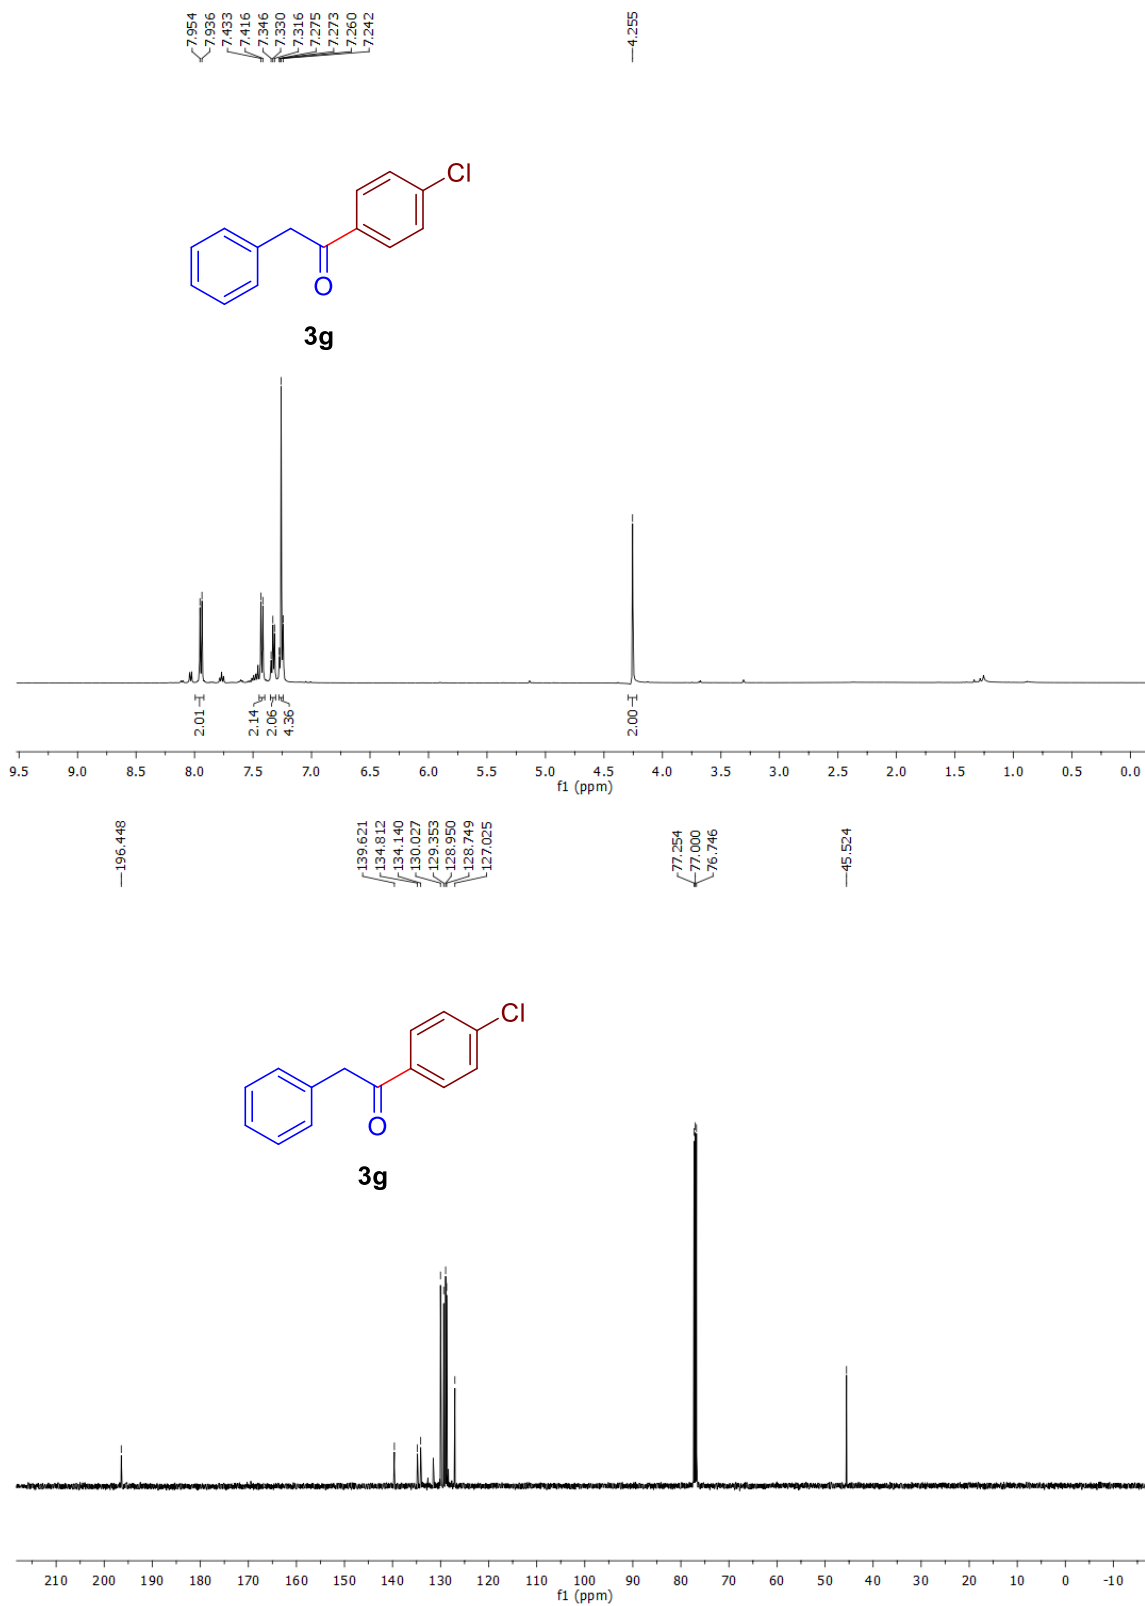

**Figure 5.7.**  $^1\text{H}$  NMR (500 MHz) and  $^{13}\text{C}$  NMR (125 MHz) Spectra of (**3g**) in  $\text{CDCl}_3$ .

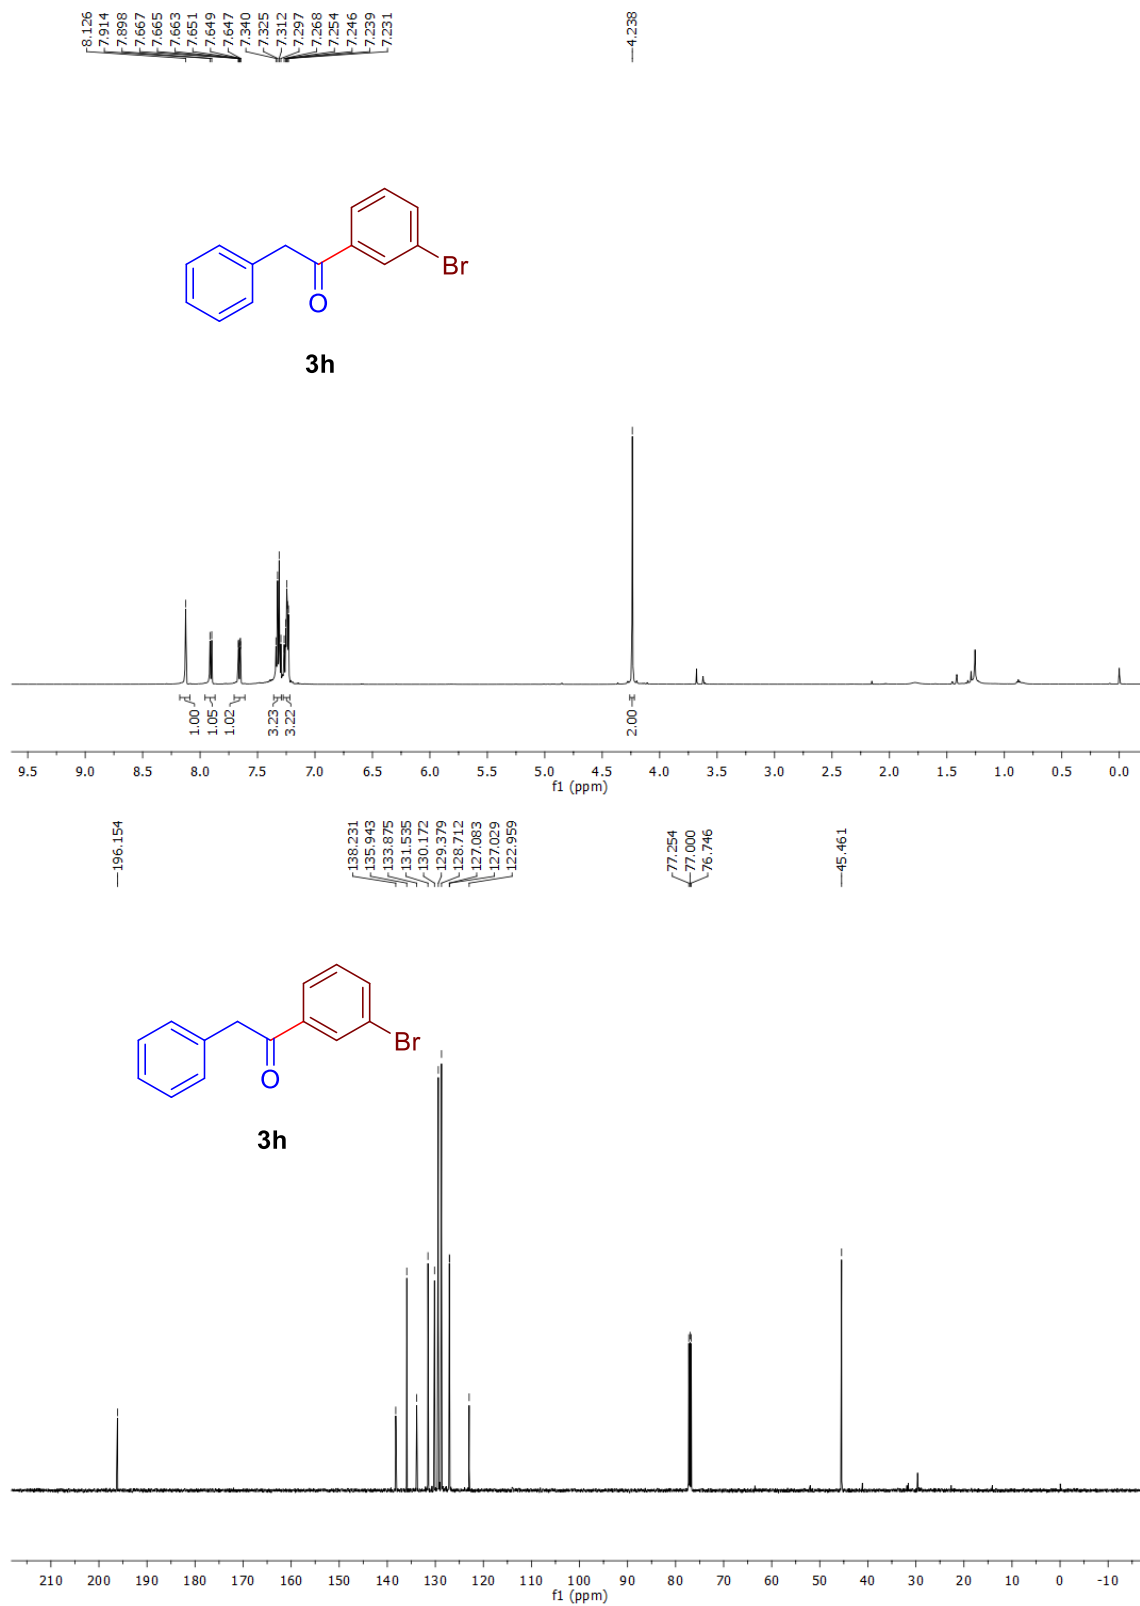

**Figure 5.8.** <sup>1</sup>H NMR (500 MHz) and <sup>13</sup>C NMR (125 MHz) Spectra of (**3h**) in CDCl<sub>3</sub>.

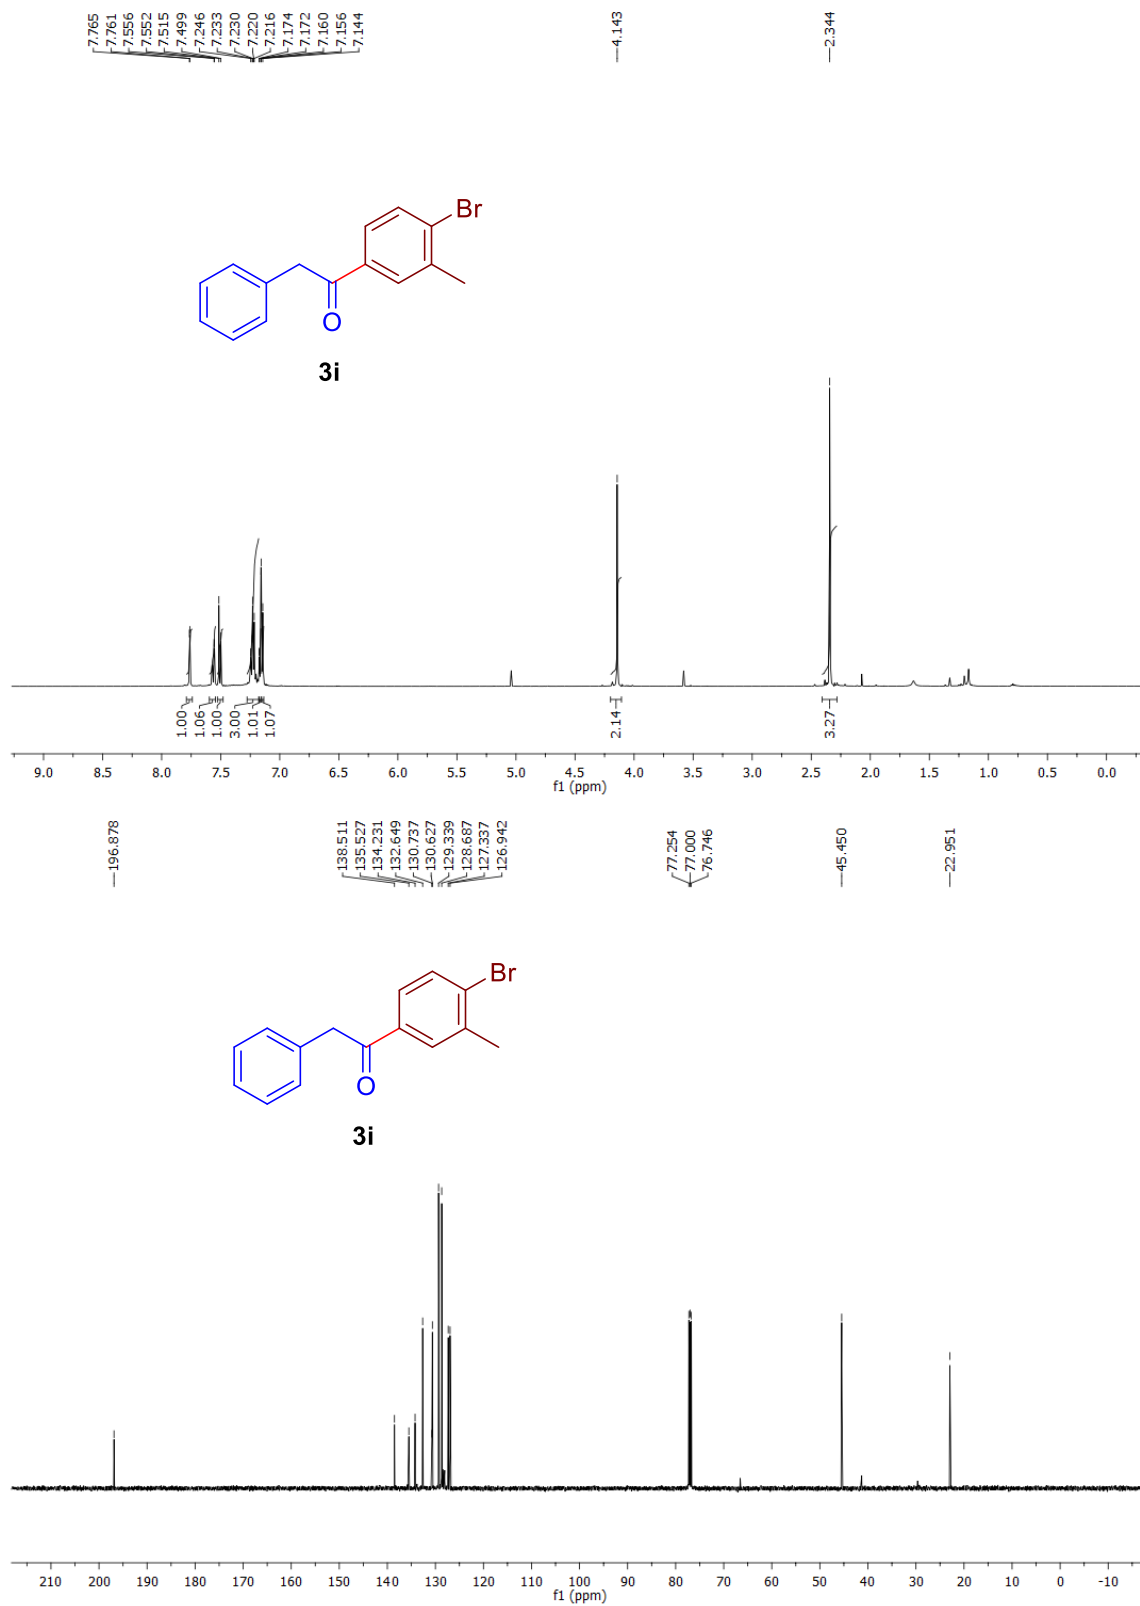

Figure 5.9. <sup>1</sup>H NMR (500 MHz) and <sup>13</sup>C NMR (125 MHz) Spectra of (**3i**) in CDCl<sub>3</sub>.

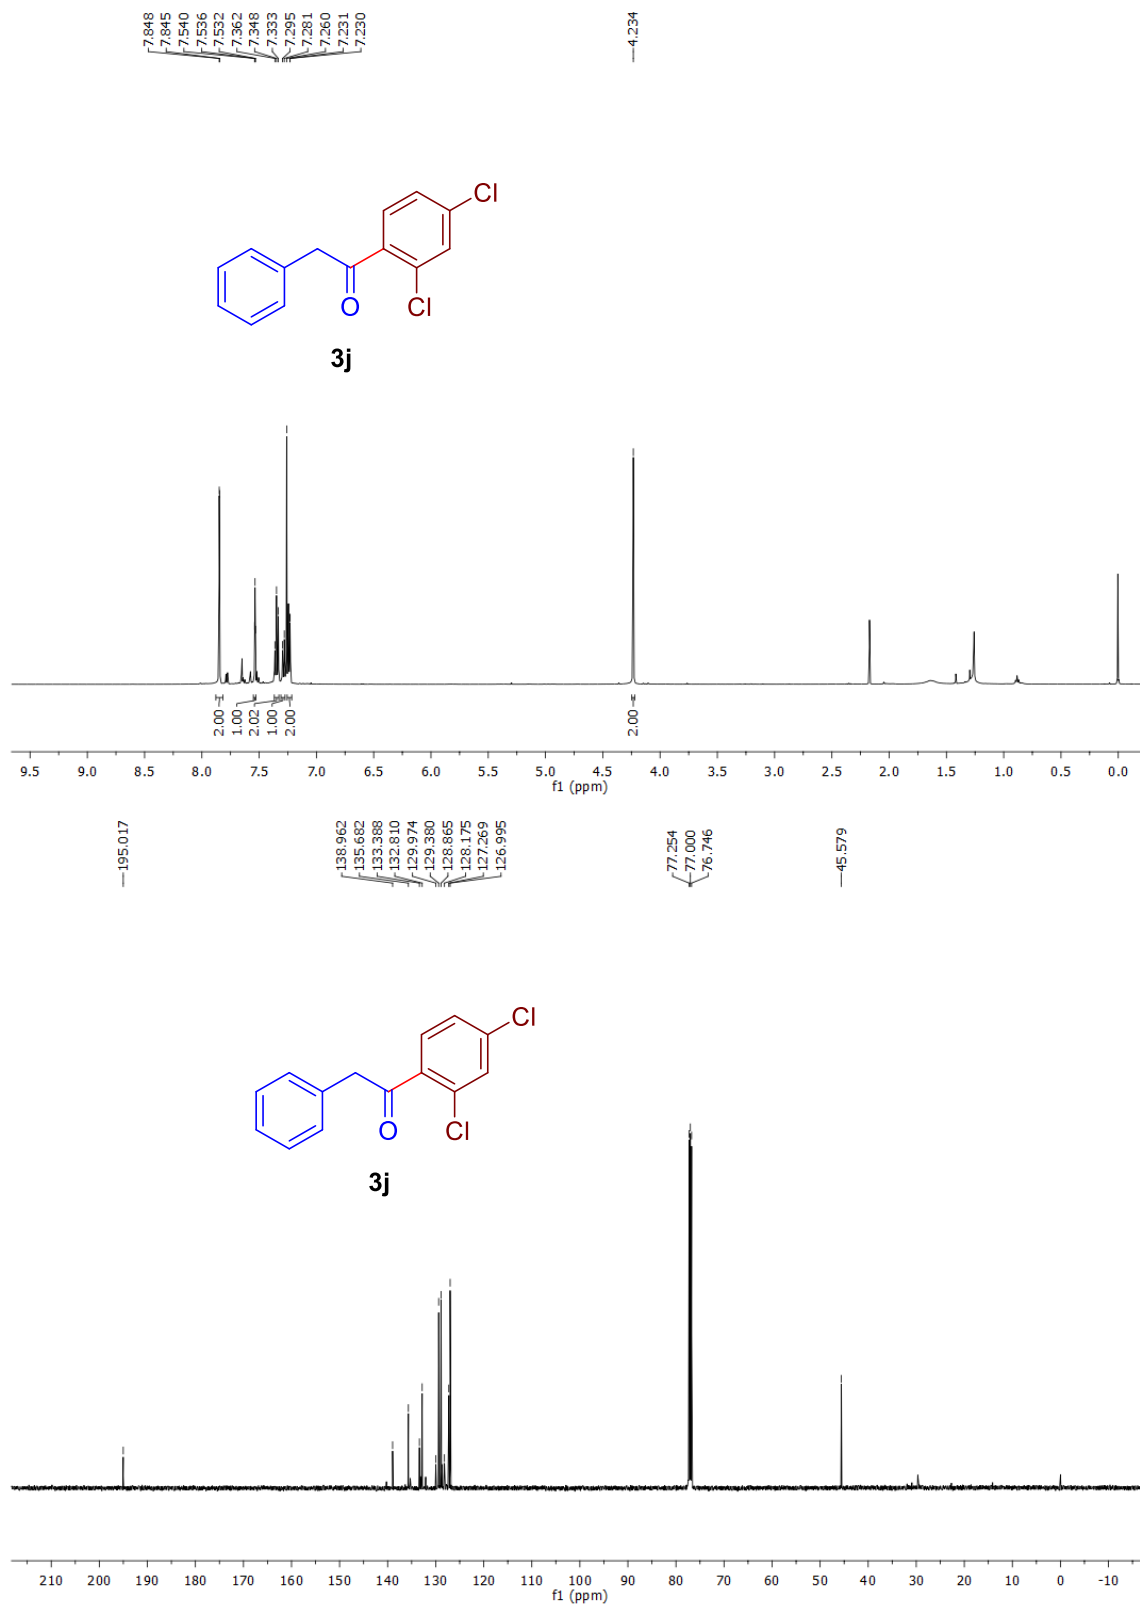

**Figure 5.10.**  $^1\text{H}$  NMR (500 MHz) and  $^{13}\text{C}$  NMR (125 MHz) Spectra of **(3j)** in  $\text{CDCl}_3$ .

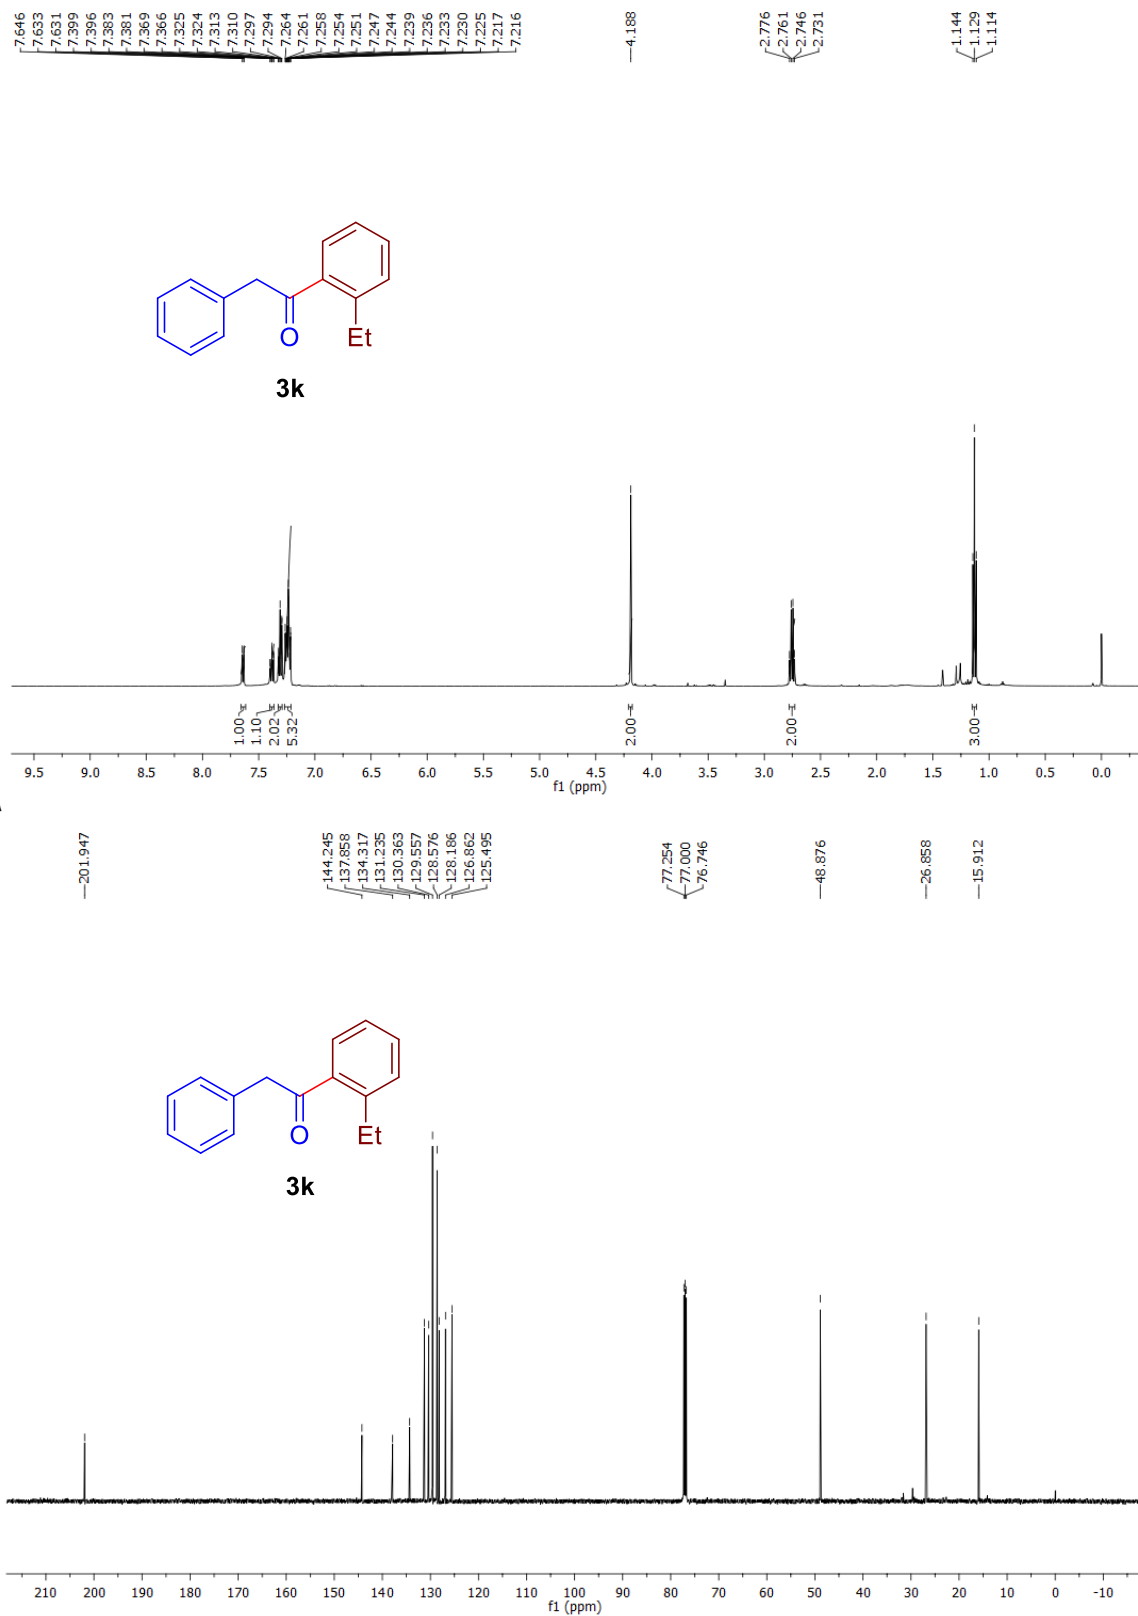

**Figure 5.11.** <sup>1</sup>H NMR (500 MHz) and <sup>13</sup>C NMR (125 MHz) Spectra of (**3k**) in CDCl<sub>3</sub>.

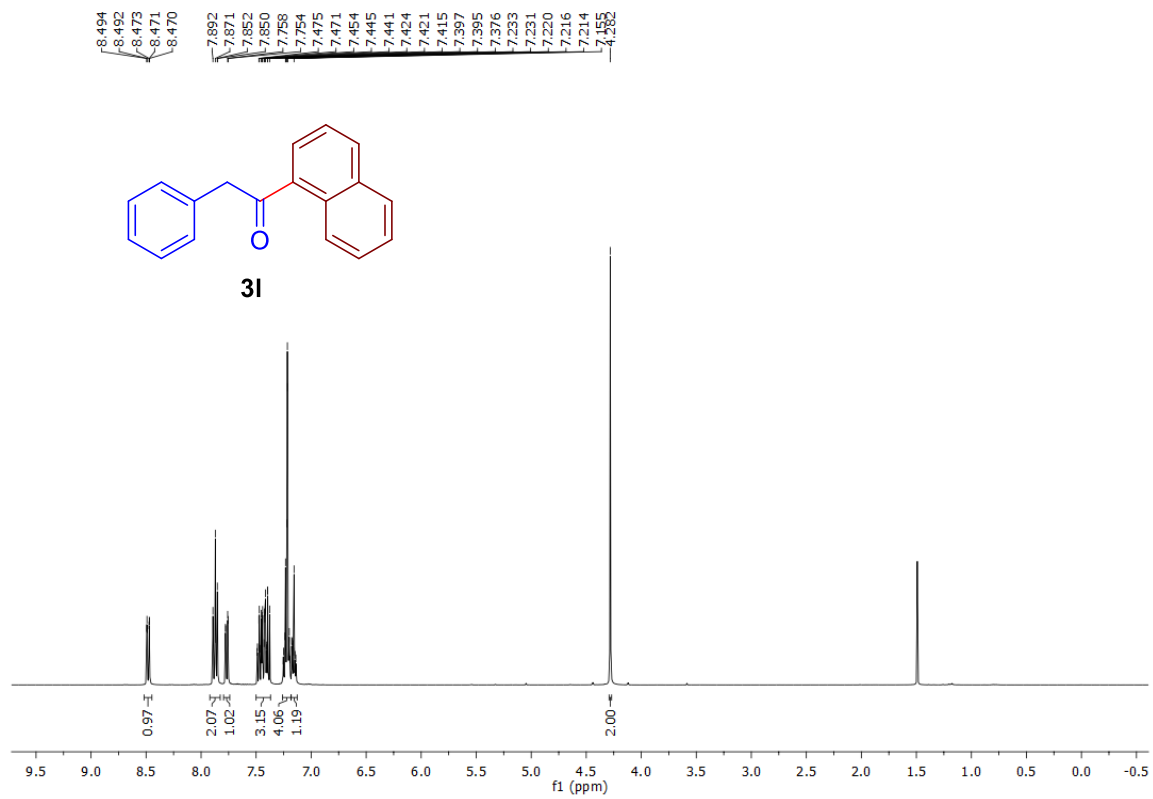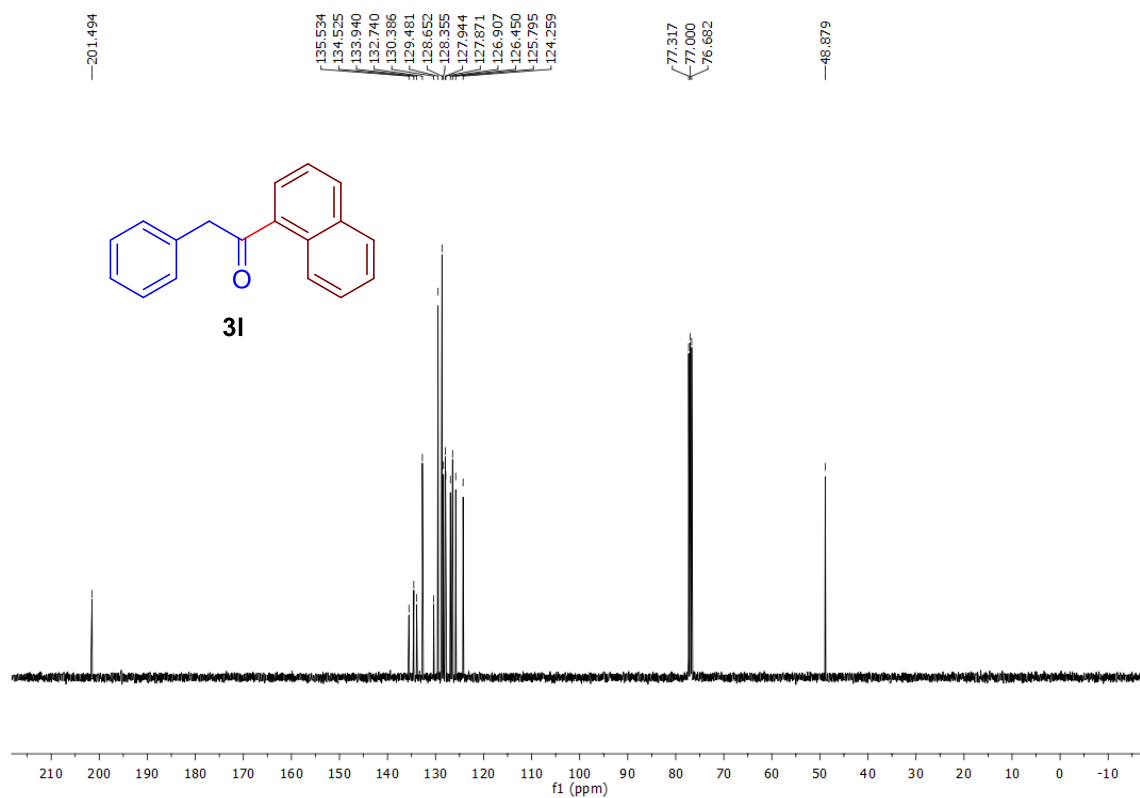

Figure 5.12.  $^1\text{H}$  NMR (400 MHz) and  $^{13}\text{C}$  NMR (100 MHz) Spectra of **(31)** in  $\text{CDCl}_3$

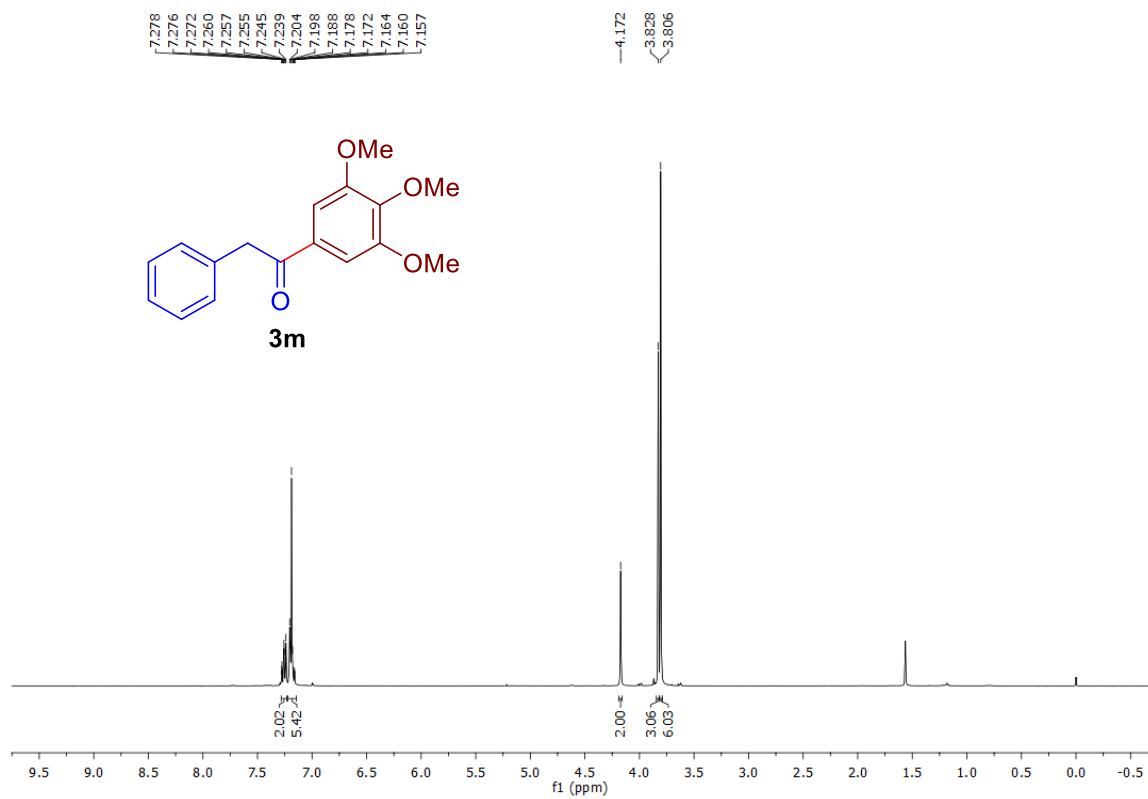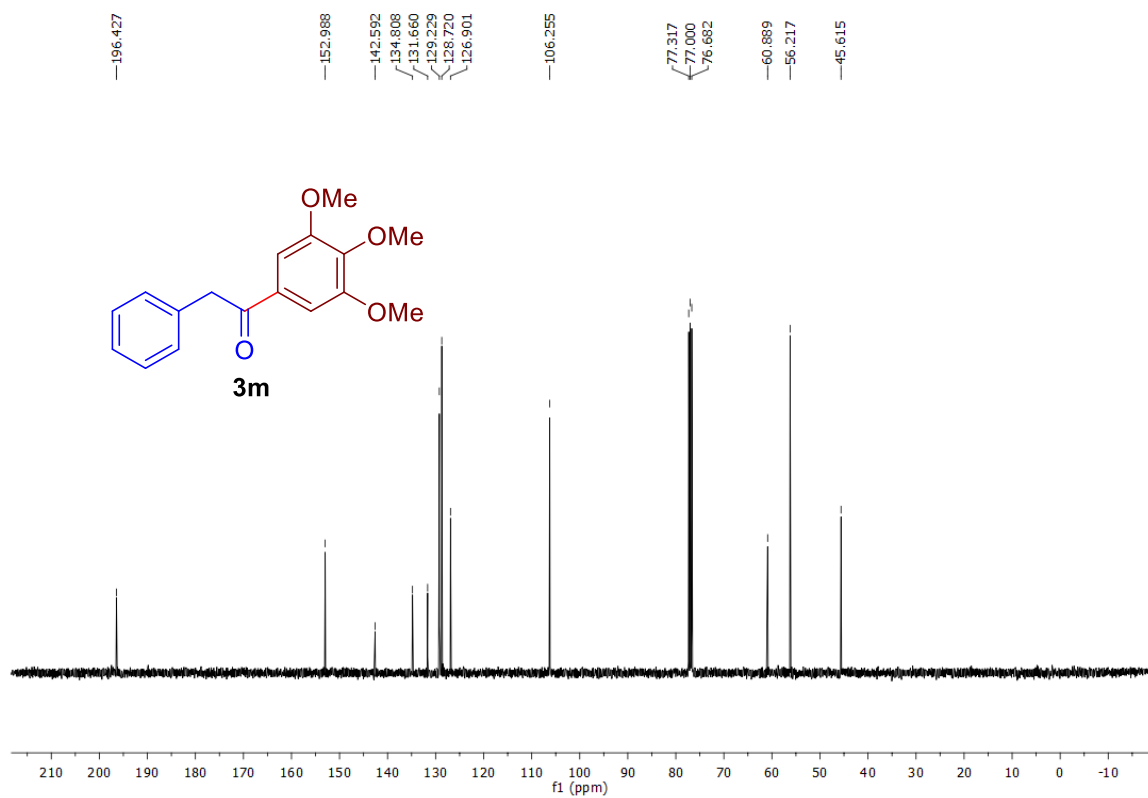

**Figure 5.13.** <sup>1</sup>H NMR (400 MHz) and <sup>13</sup>C NMR (100 MHz) Spectra of (**3m**) in CDCl<sub>3</sub>



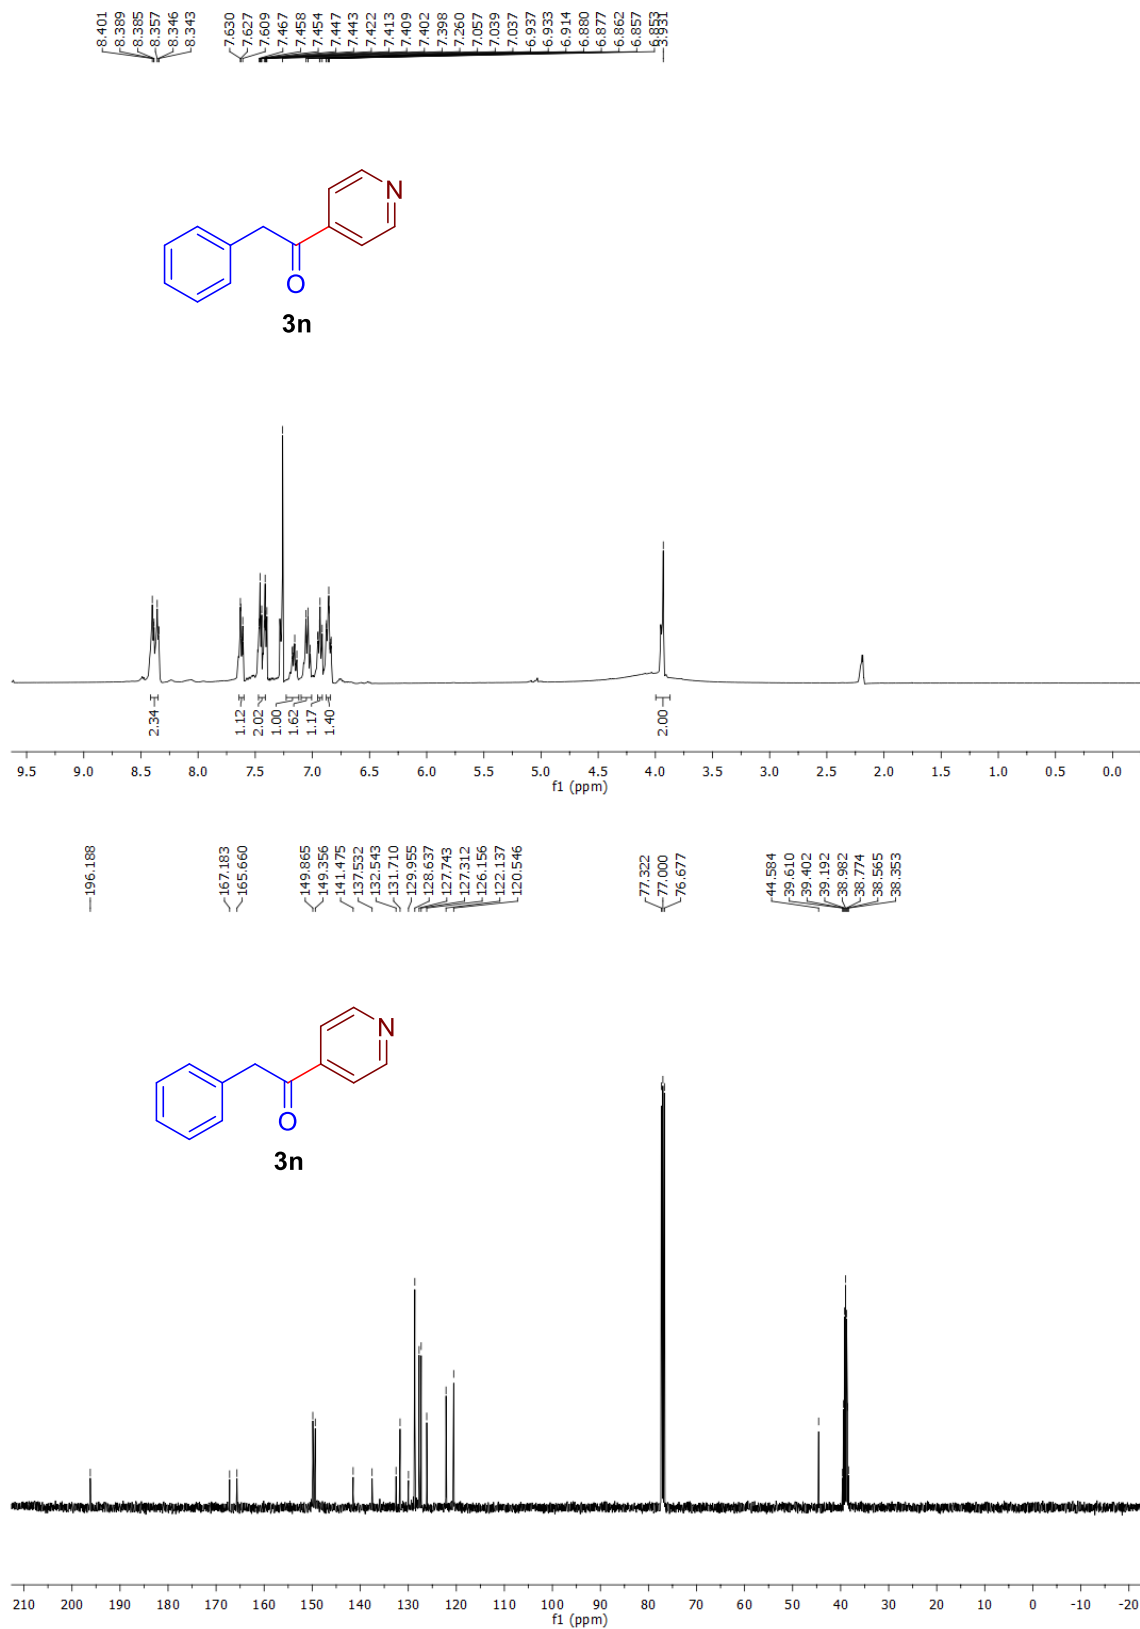

Figure 5.14. <sup>1</sup>H NMR (400 MHz) and <sup>13</sup>C NMR (100 MHz) Spectra of (**3n**) in CDCl<sub>3</sub> + DMSO-*d*<sub>6</sub>.

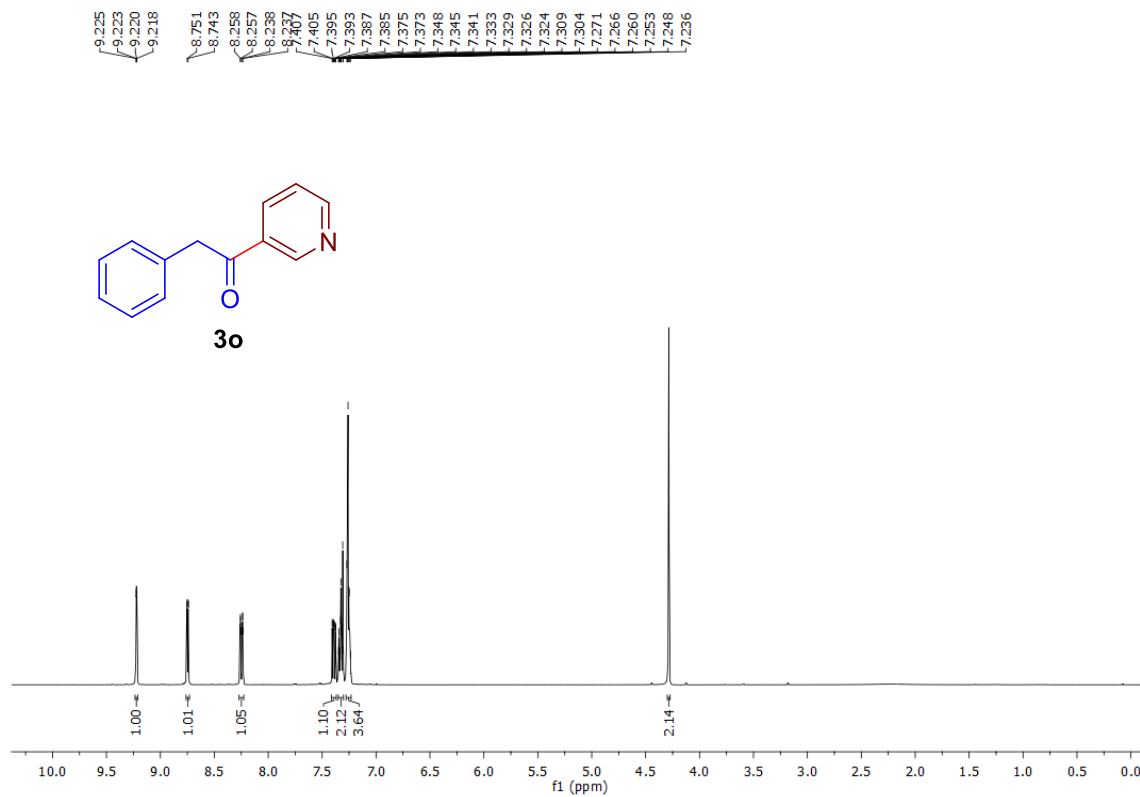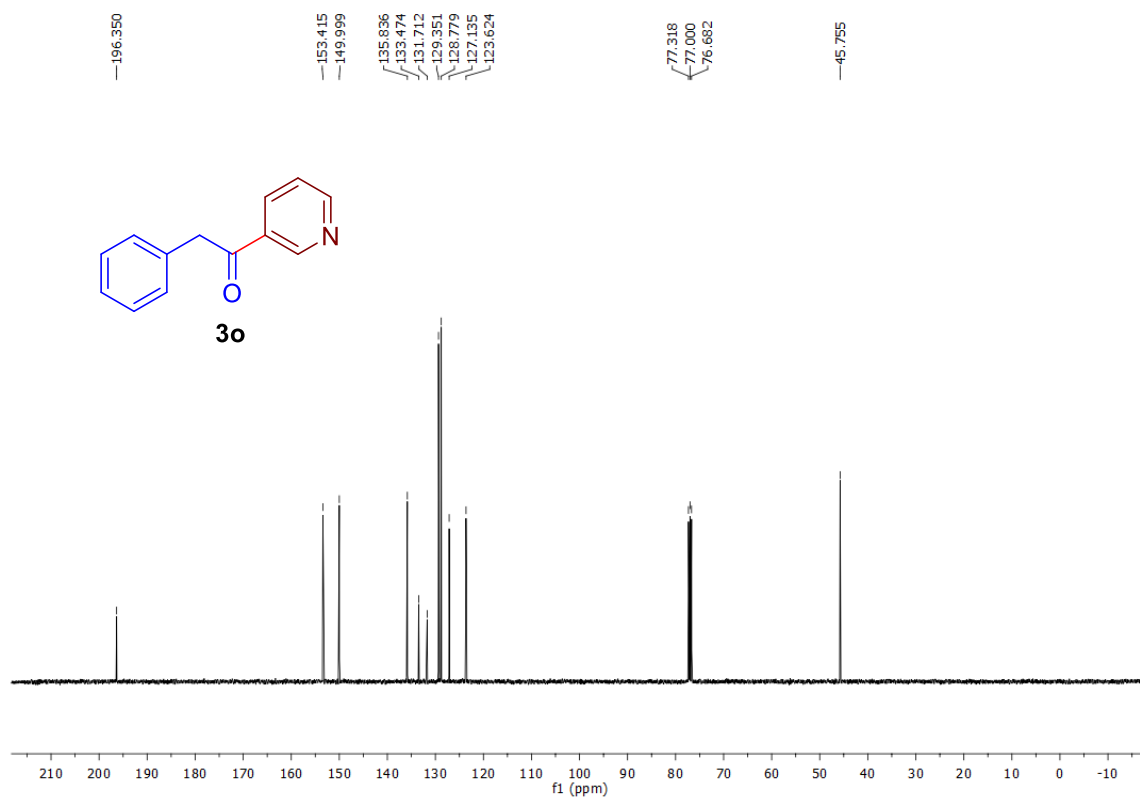

Figure 5.15. <sup>1</sup>H NMR (400 MHz) and <sup>13</sup>C NMR (100 MHz) Spectra of (**3o**) in CDCl<sub>3</sub>.

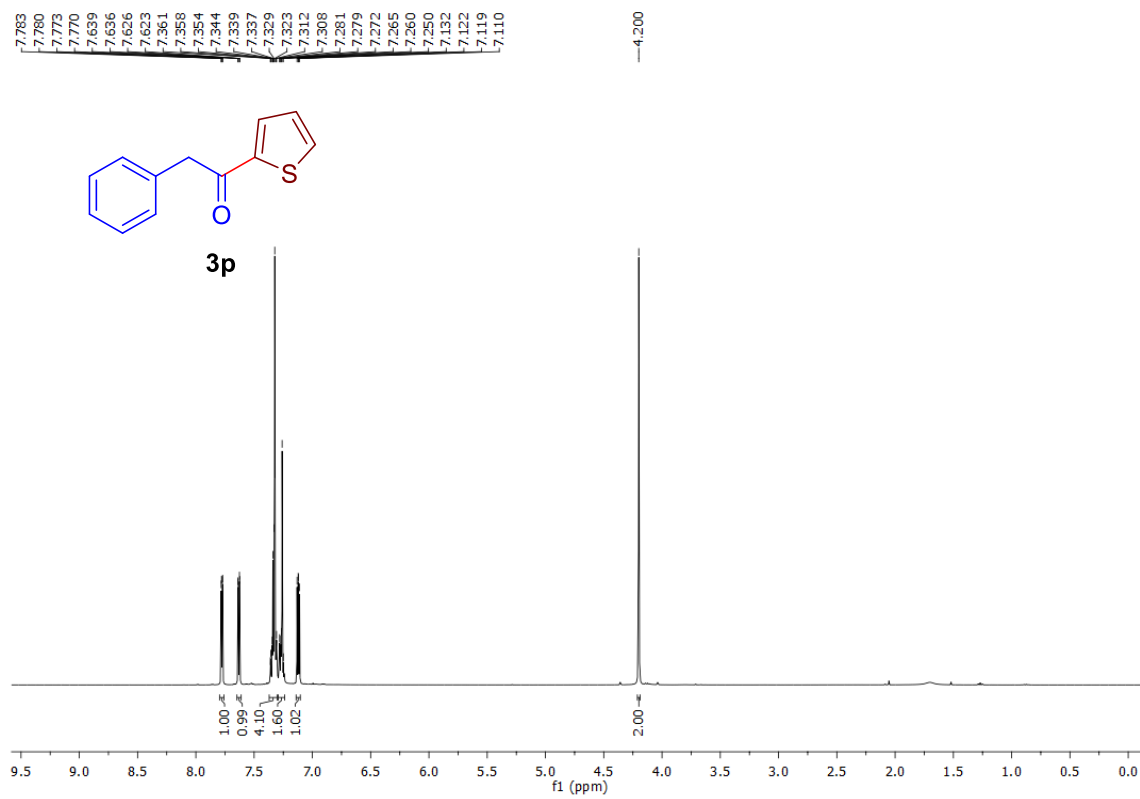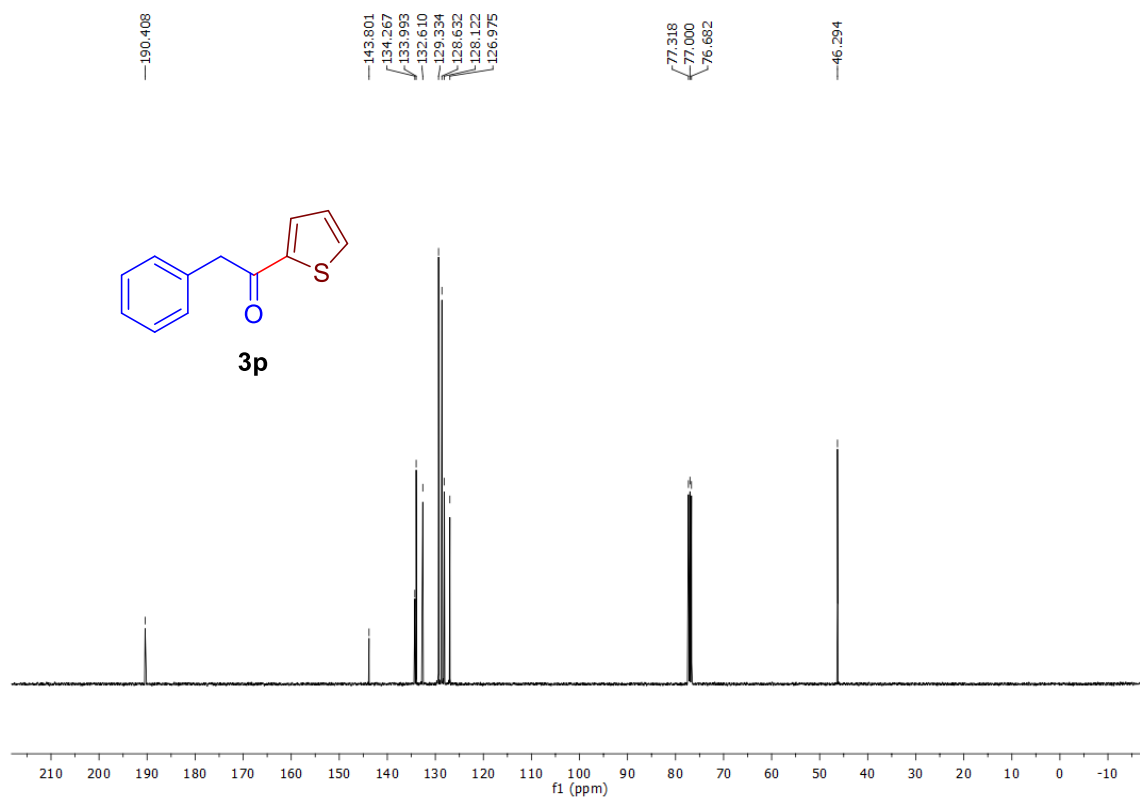

**Figure 5.16.**  $^1\text{H NMR}$  (400 MHz) and  $^{13}\text{C NMR}$  (100 MHz) Spectra of (**3p**) in  $\text{CDCl}_3$ .

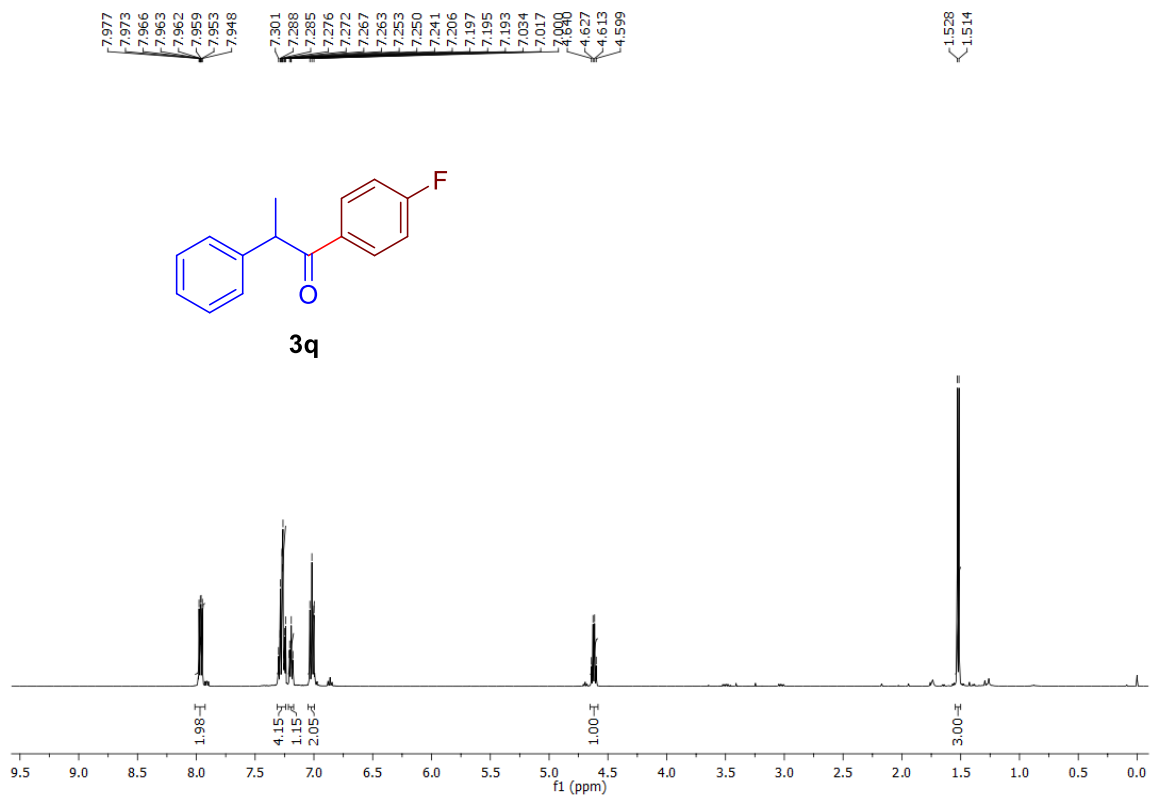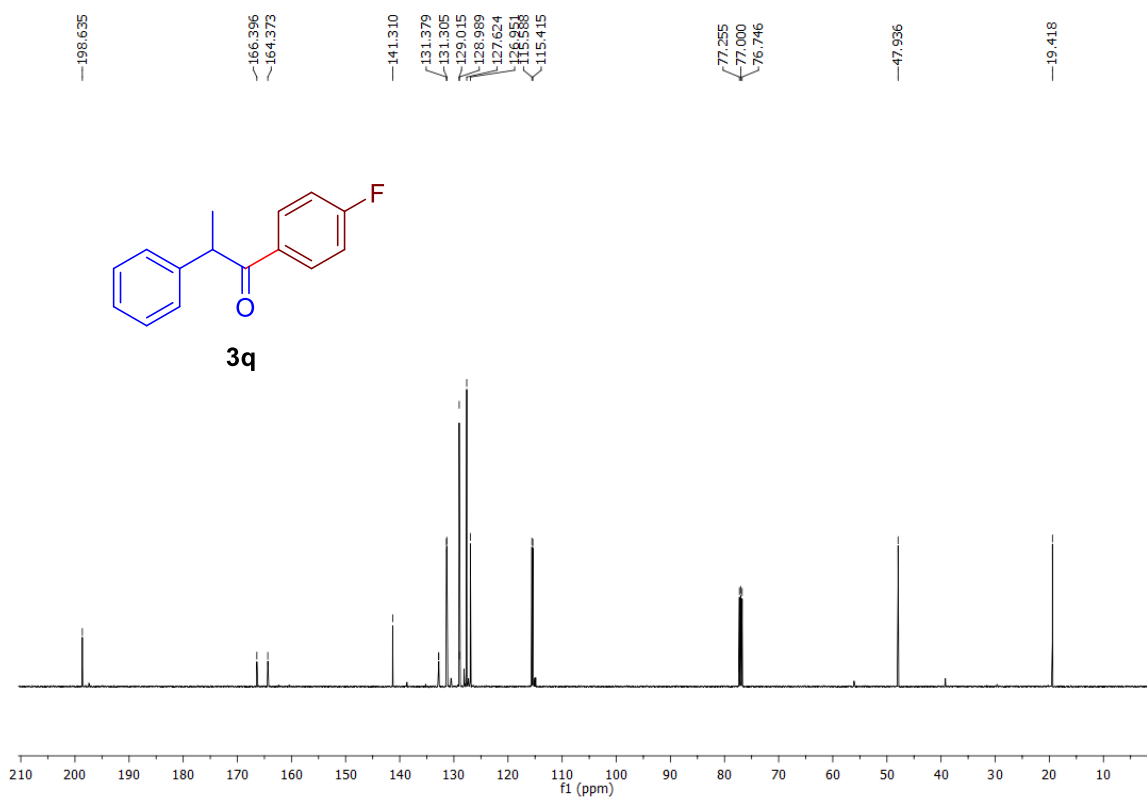

**Figure 5.17.** <sup>1</sup>H NMR (500 MHz) and <sup>13</sup>C NMR (125 MHz) Spectra of (**3q**) in CDCl<sub>3</sub>.

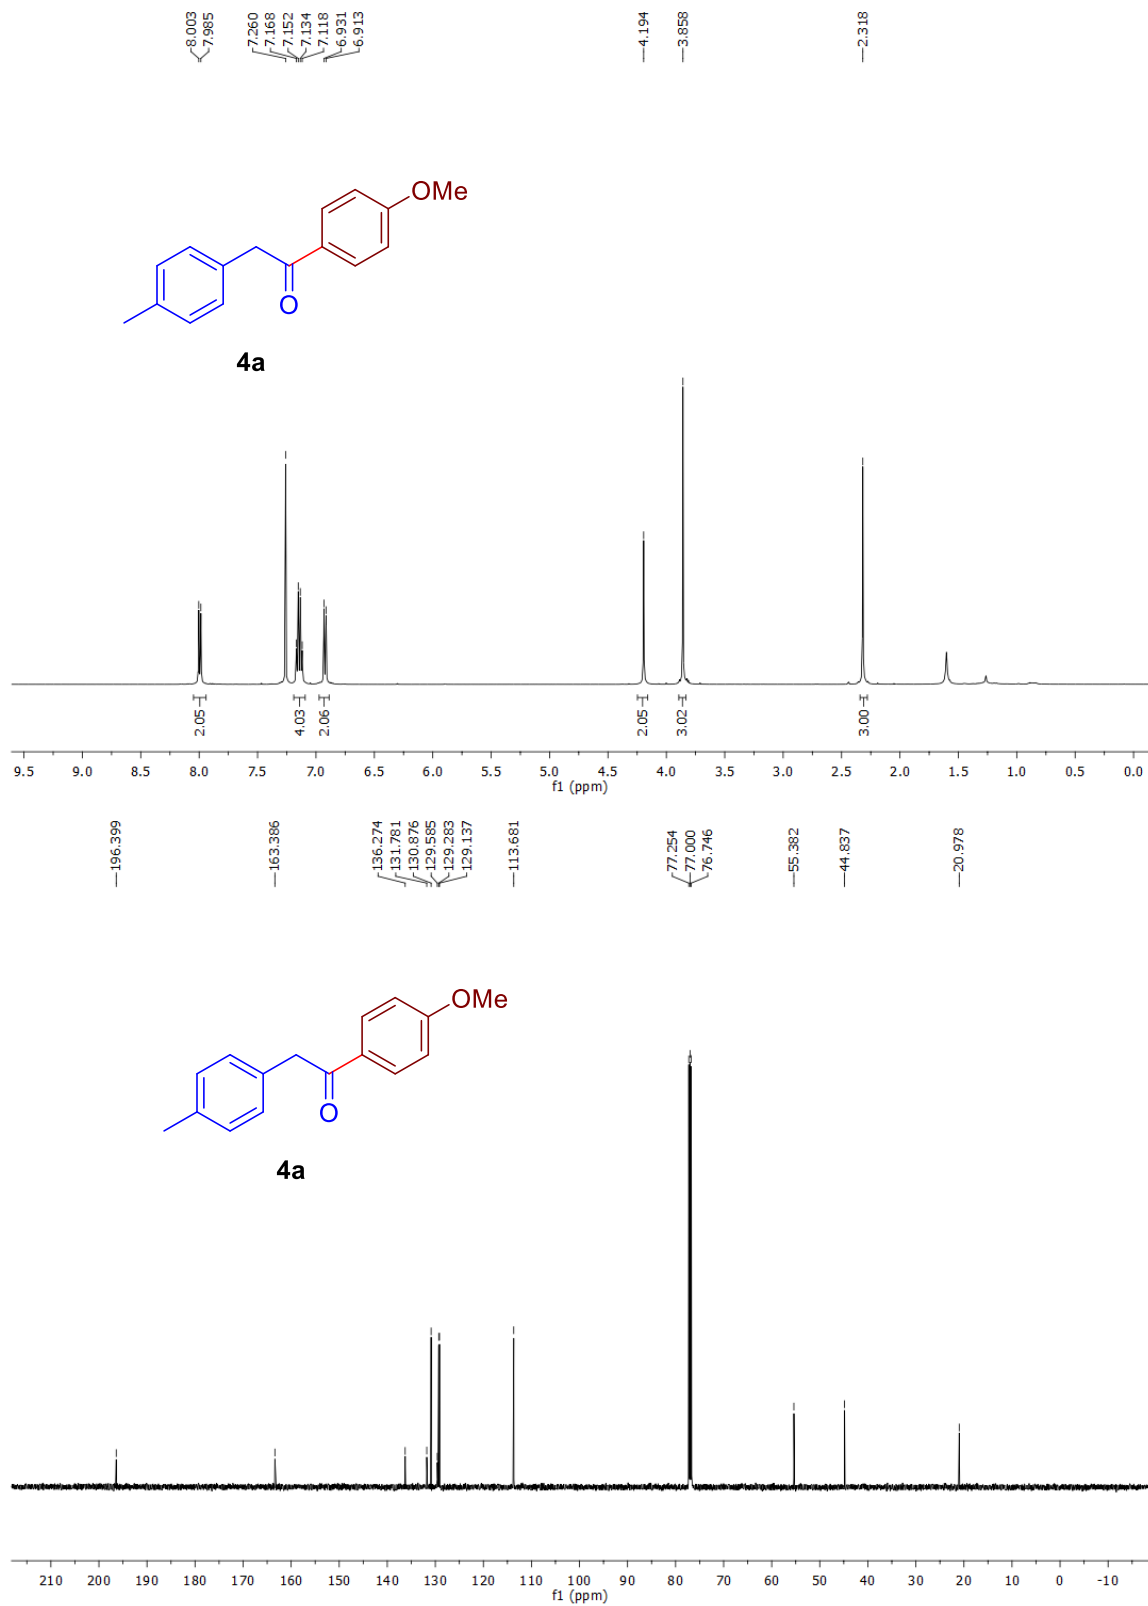

**Figure 5.18.** <sup>1</sup>H NMR (500 MHz) and <sup>13</sup>C NMR (125 MHz) Spectra of (**4a**) in CDCl<sub>3</sub>.

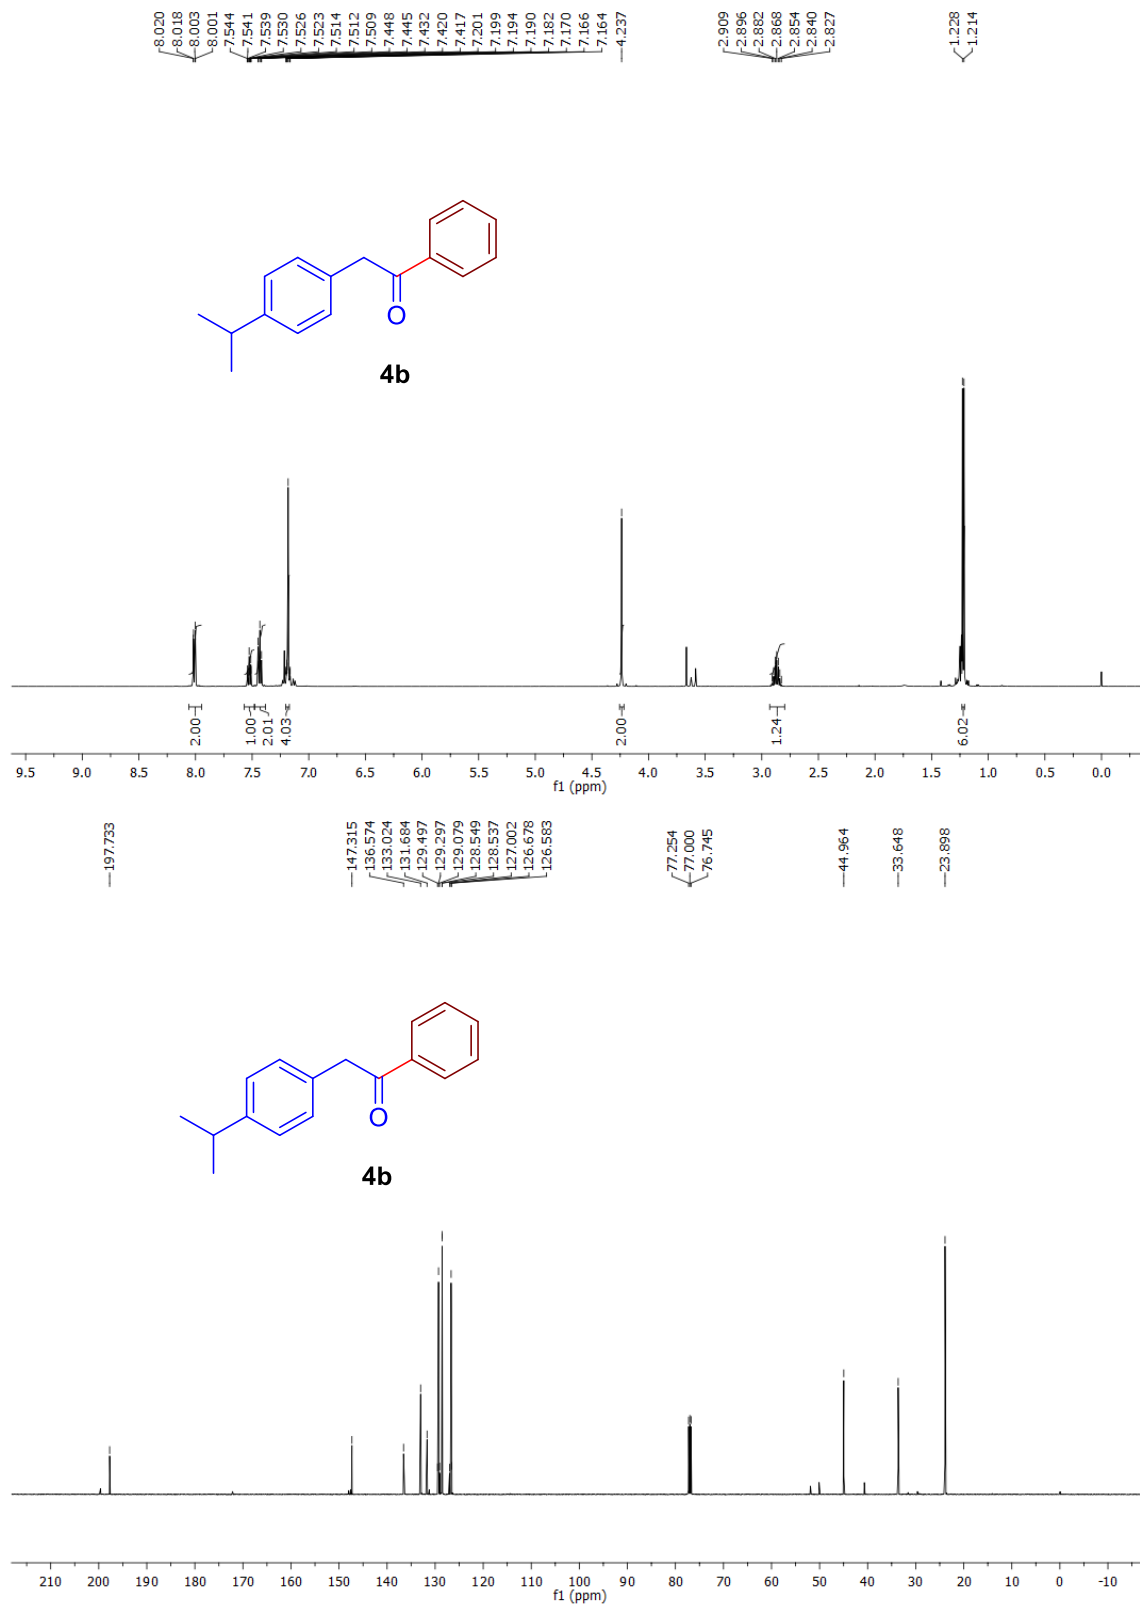

**Figure 5.19.**  $^1\text{H}$  NMR (500 MHz) and  $^{13}\text{C}$  NMR (125 MHz) Spectra of (**4b**) in  $\text{CDCl}_3$ .

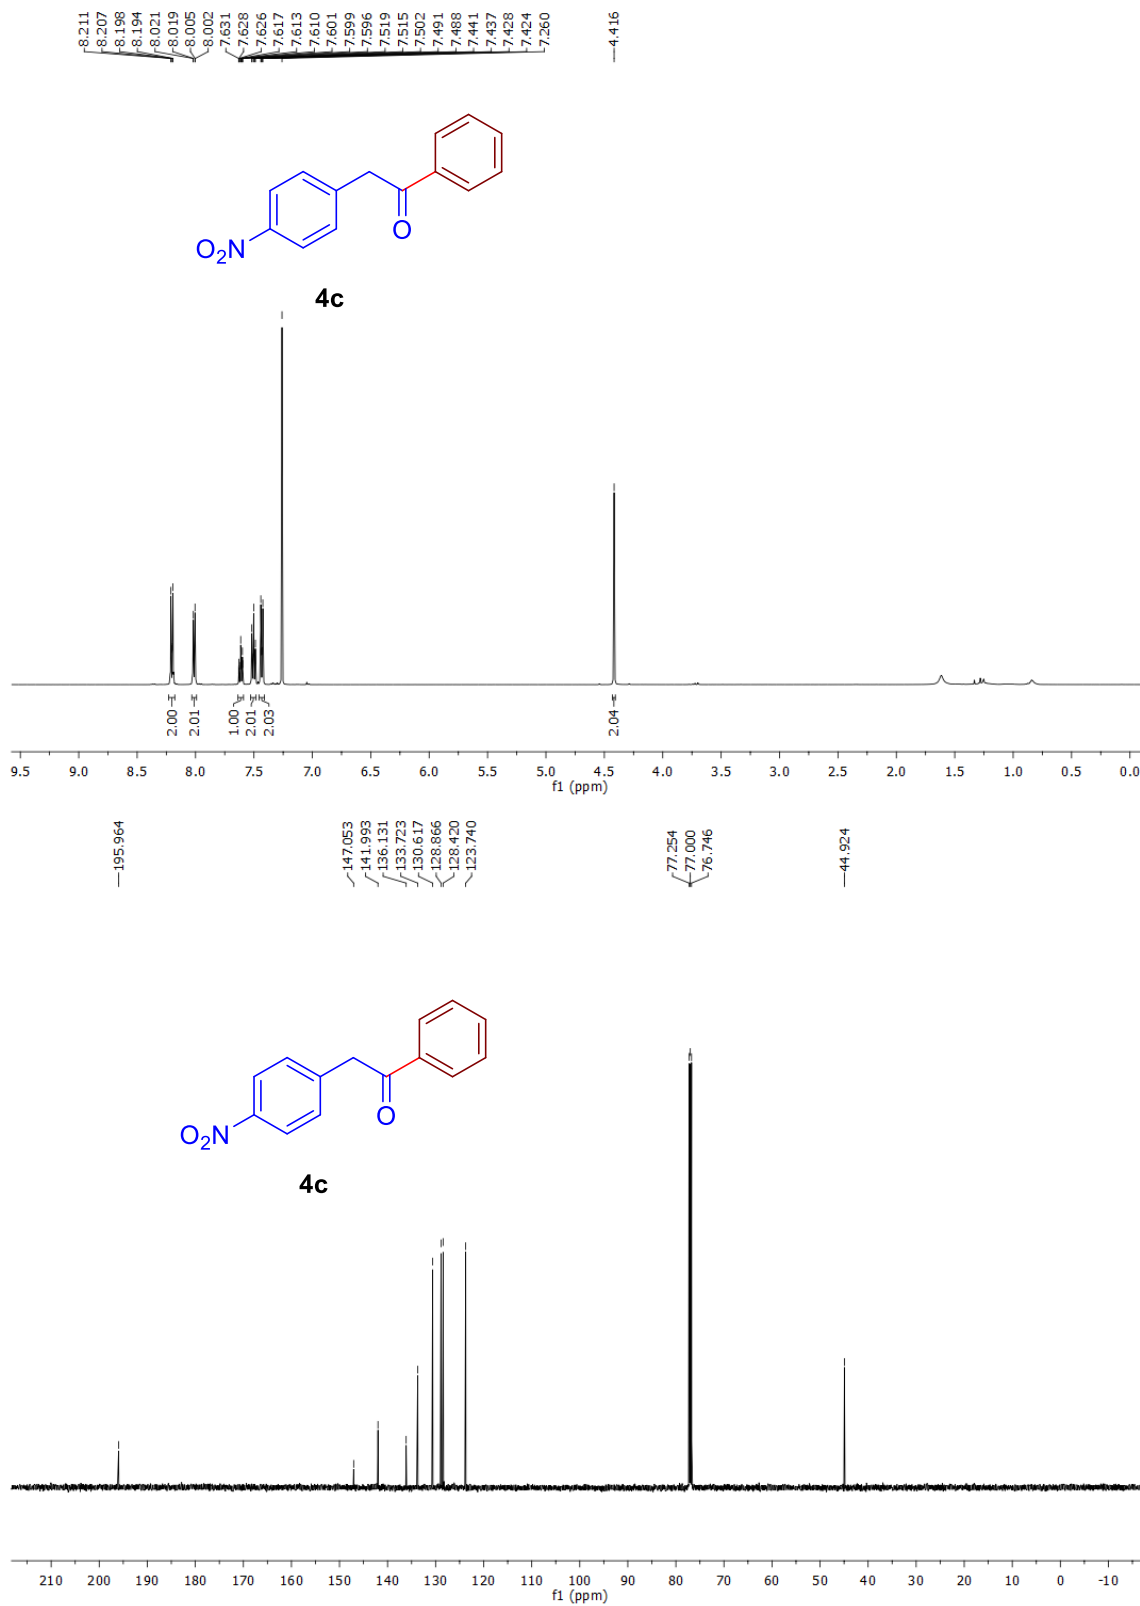

**Figure 5.20.** <sup>1</sup>H NMR (500 MHz) and <sup>13</sup>C NMR (125 MHz) Spectra of (**4c**) in CDCl<sub>3</sub>.

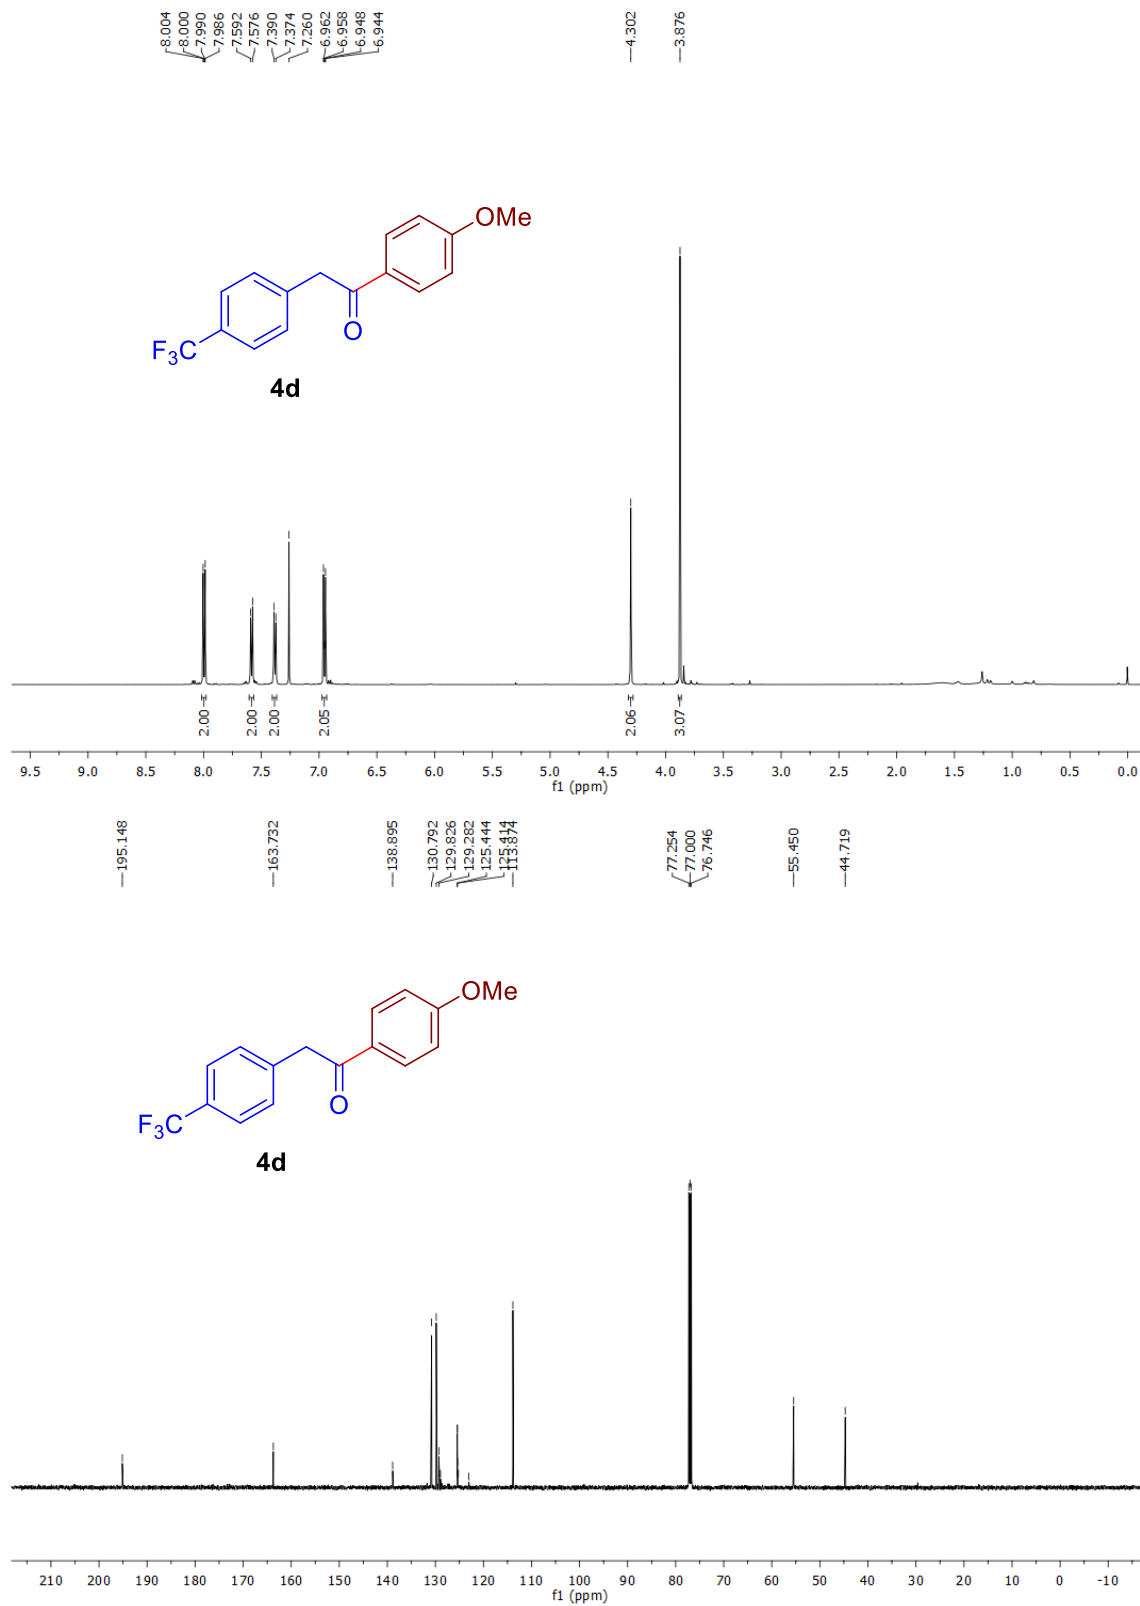

**Figure 5.21.** <sup>1</sup>H NMR (500 MHz) and <sup>13</sup>C NMR (125 MHz) Spectra of (**4d**) in CDCl<sub>3</sub>.



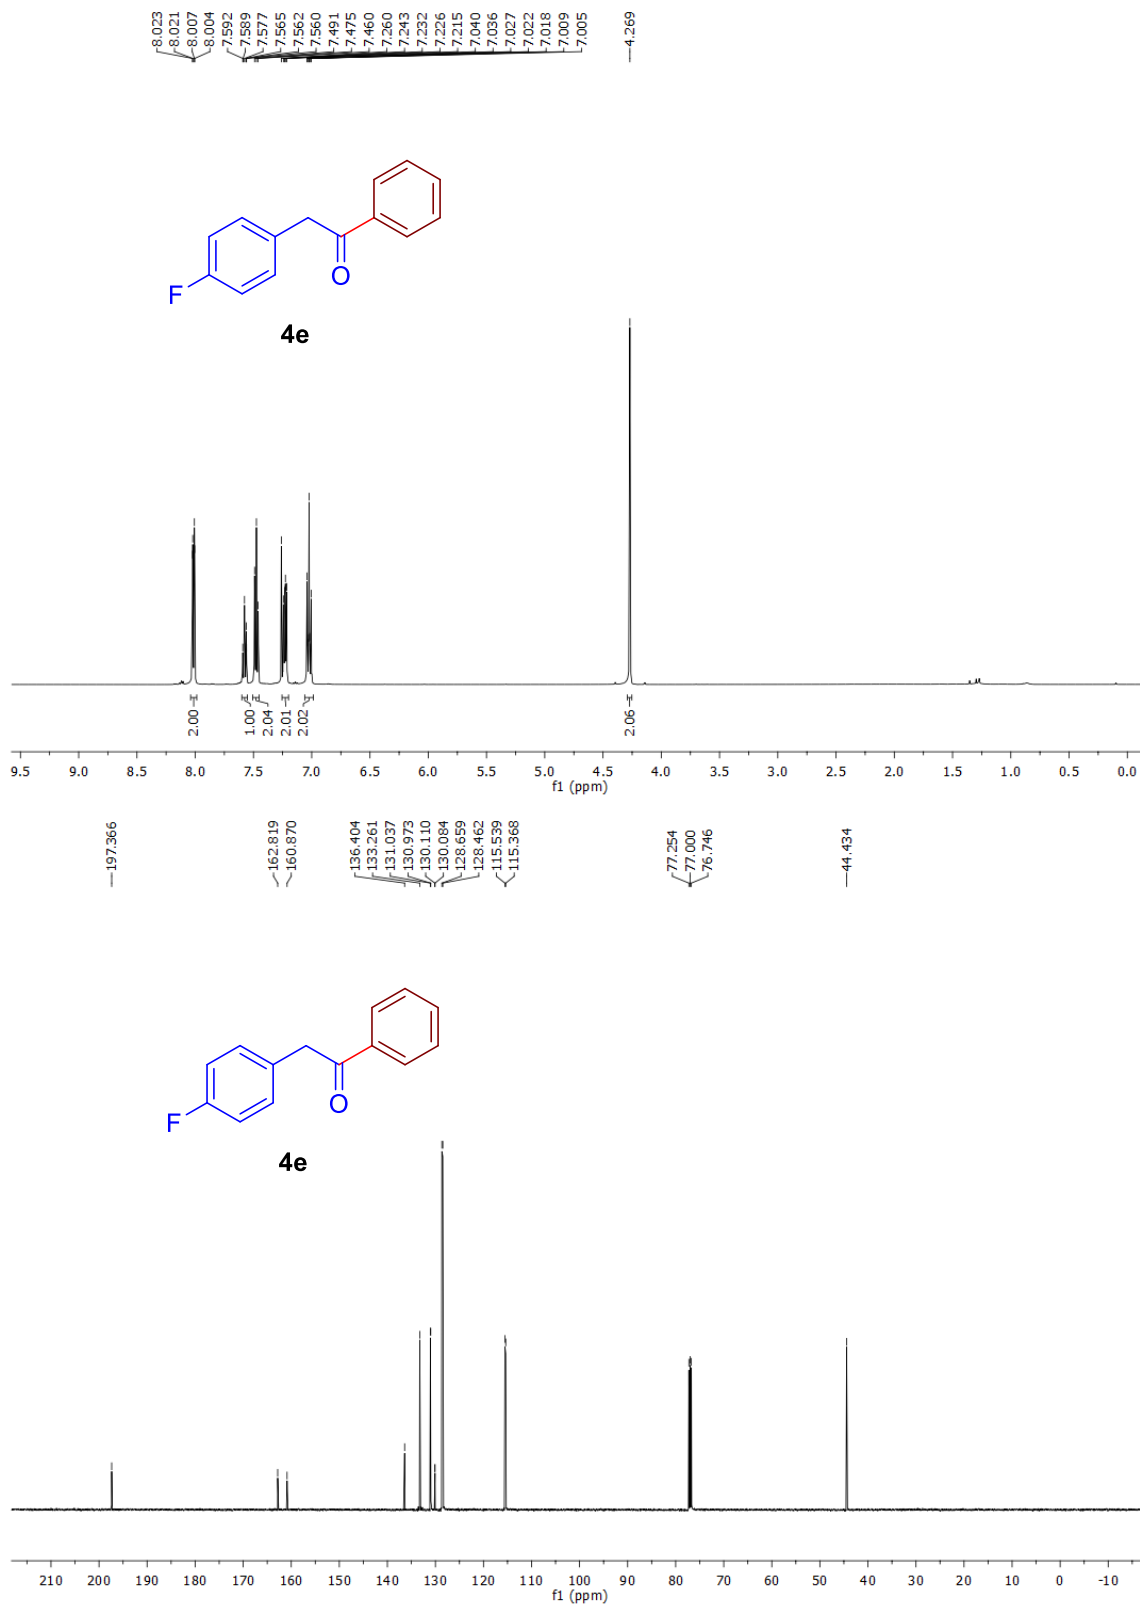

**Figure 5.22.**  $^1\text{H}$  NMR (500 MHz) and  $^{13}\text{C}$  NMR (125 MHz) Spectra of (**4e**) in  $\text{CDCl}_3$ .

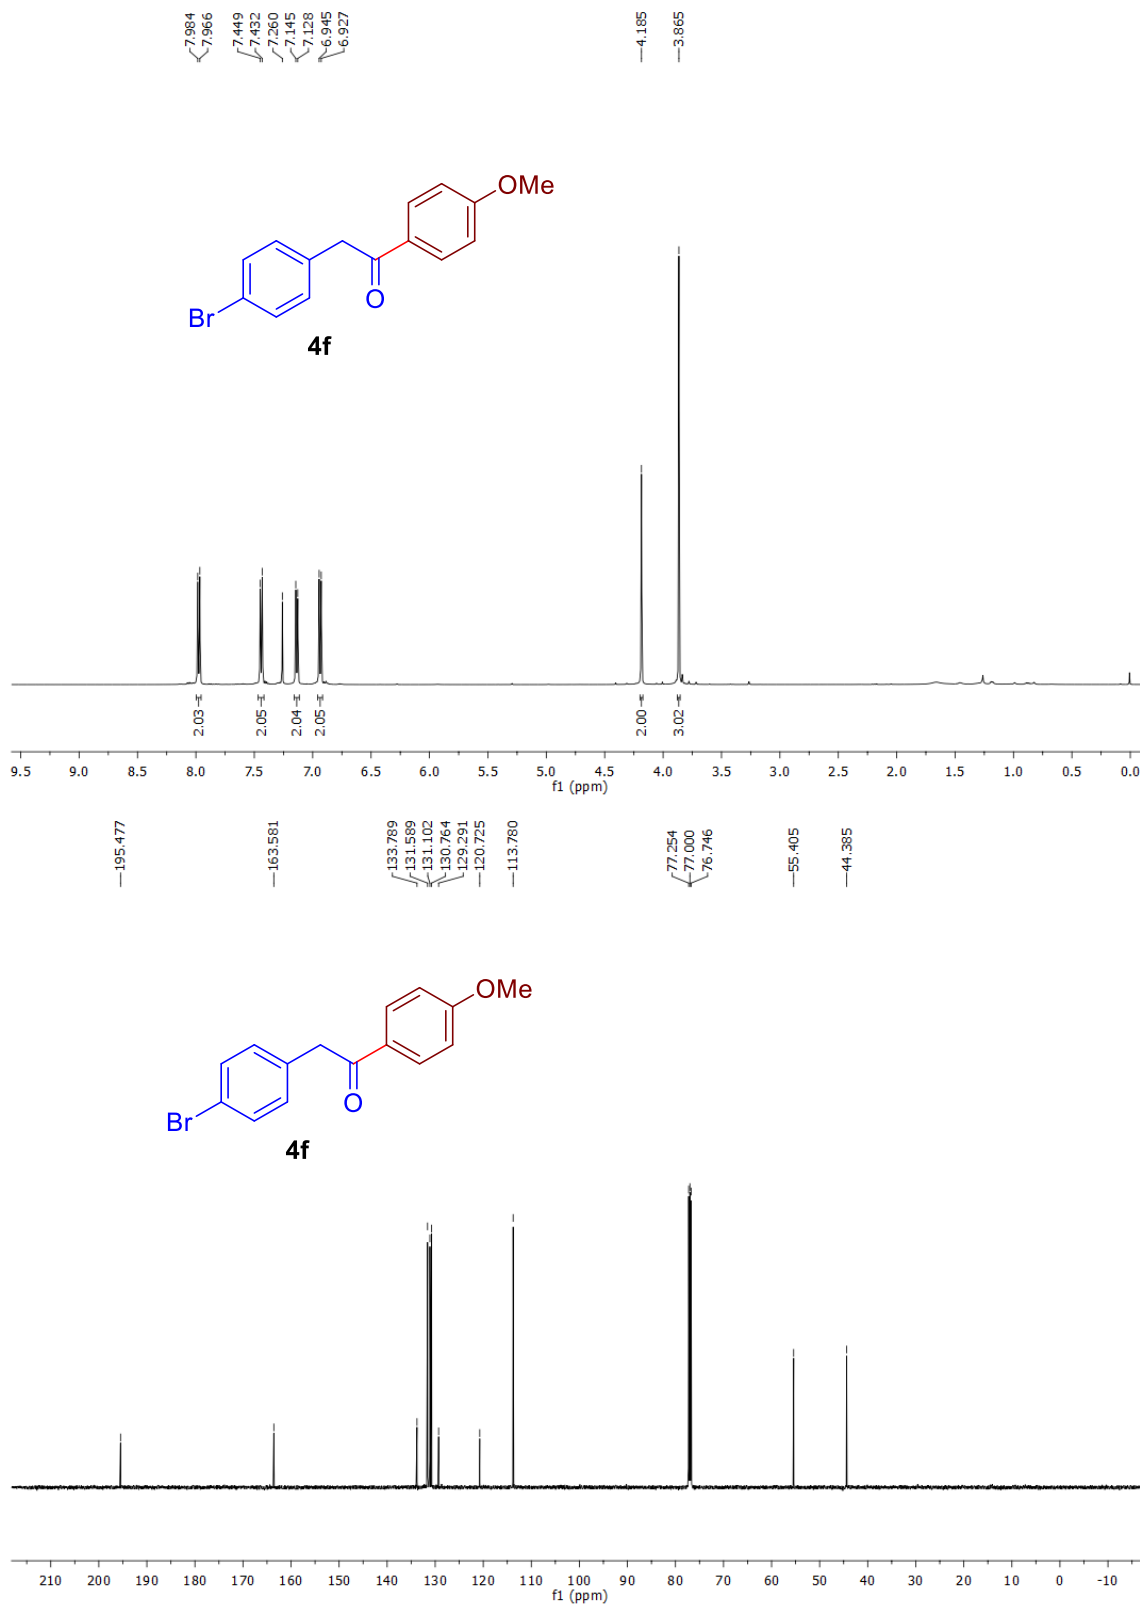

**Figure 5.23.** <sup>1</sup>H NMR (500 MHz) and <sup>13</sup>C NMR (125 MHz) Spectra of (**4f**) in CDCl<sub>3</sub>.

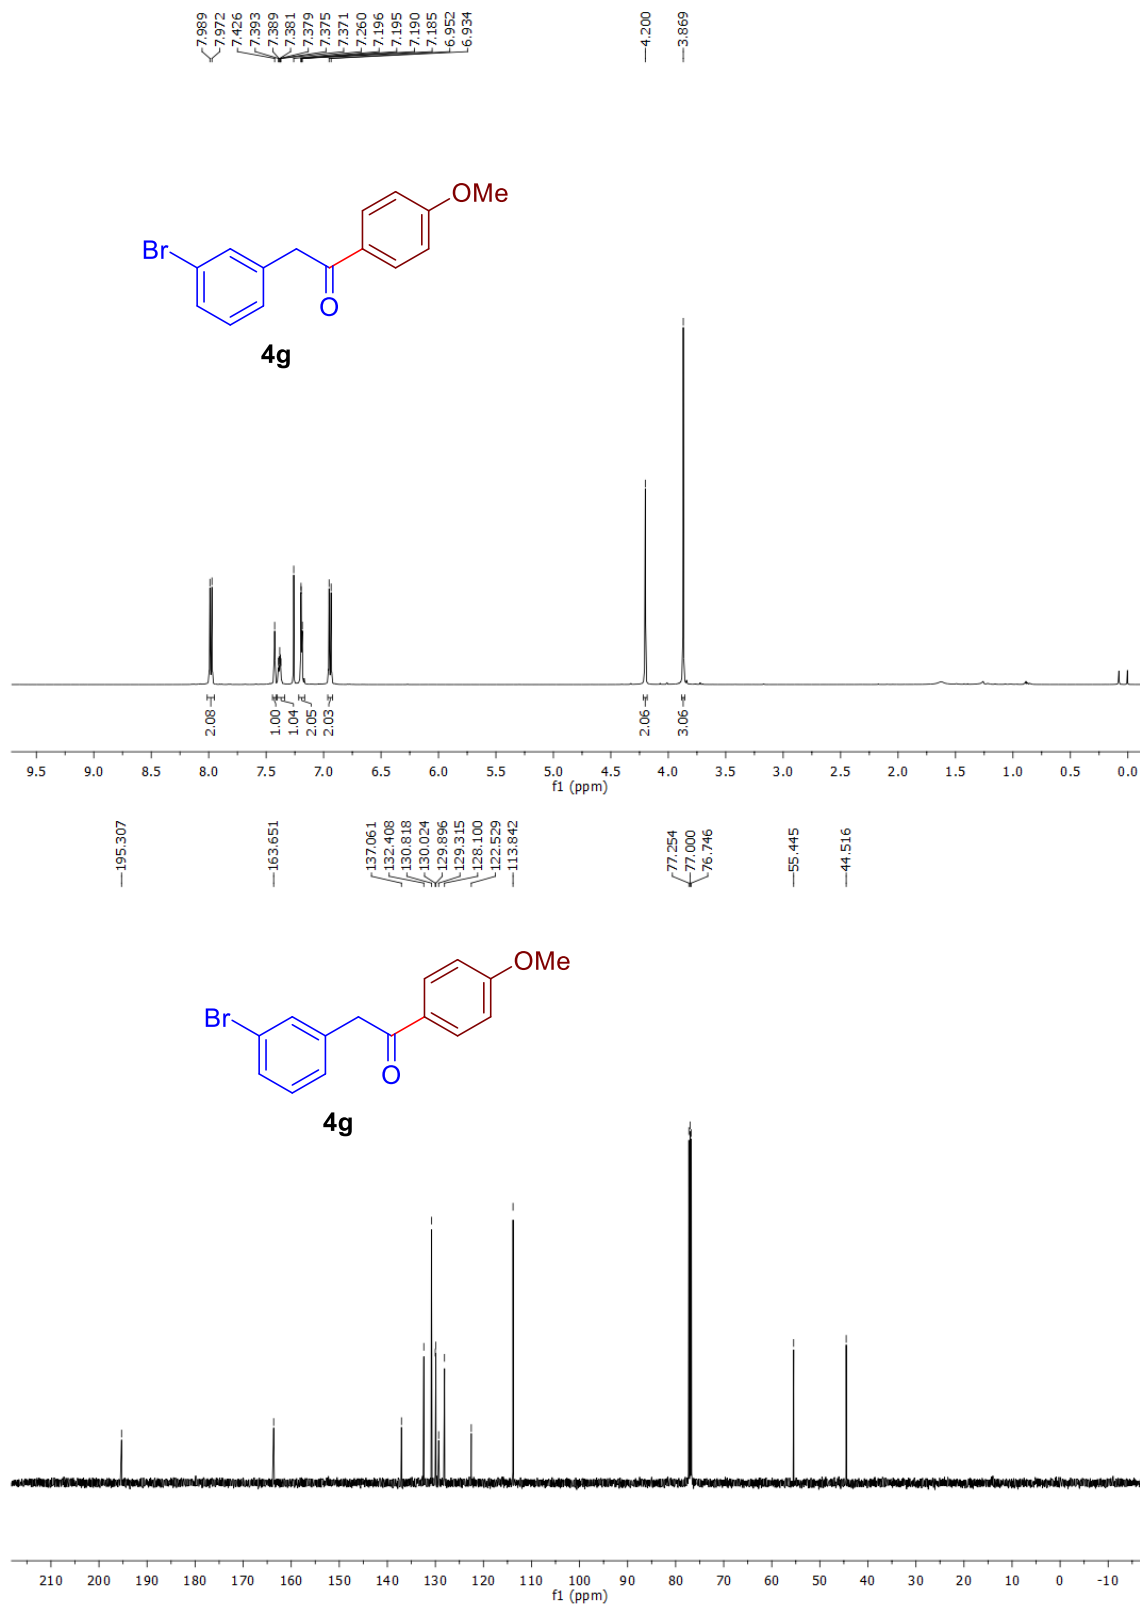

**Figure 5.24.** <sup>1</sup>H NMR (500 MHz) and <sup>13</sup>C NMR (125 MHz) Spectra of (**4g**) in CDCl<sub>3</sub>.

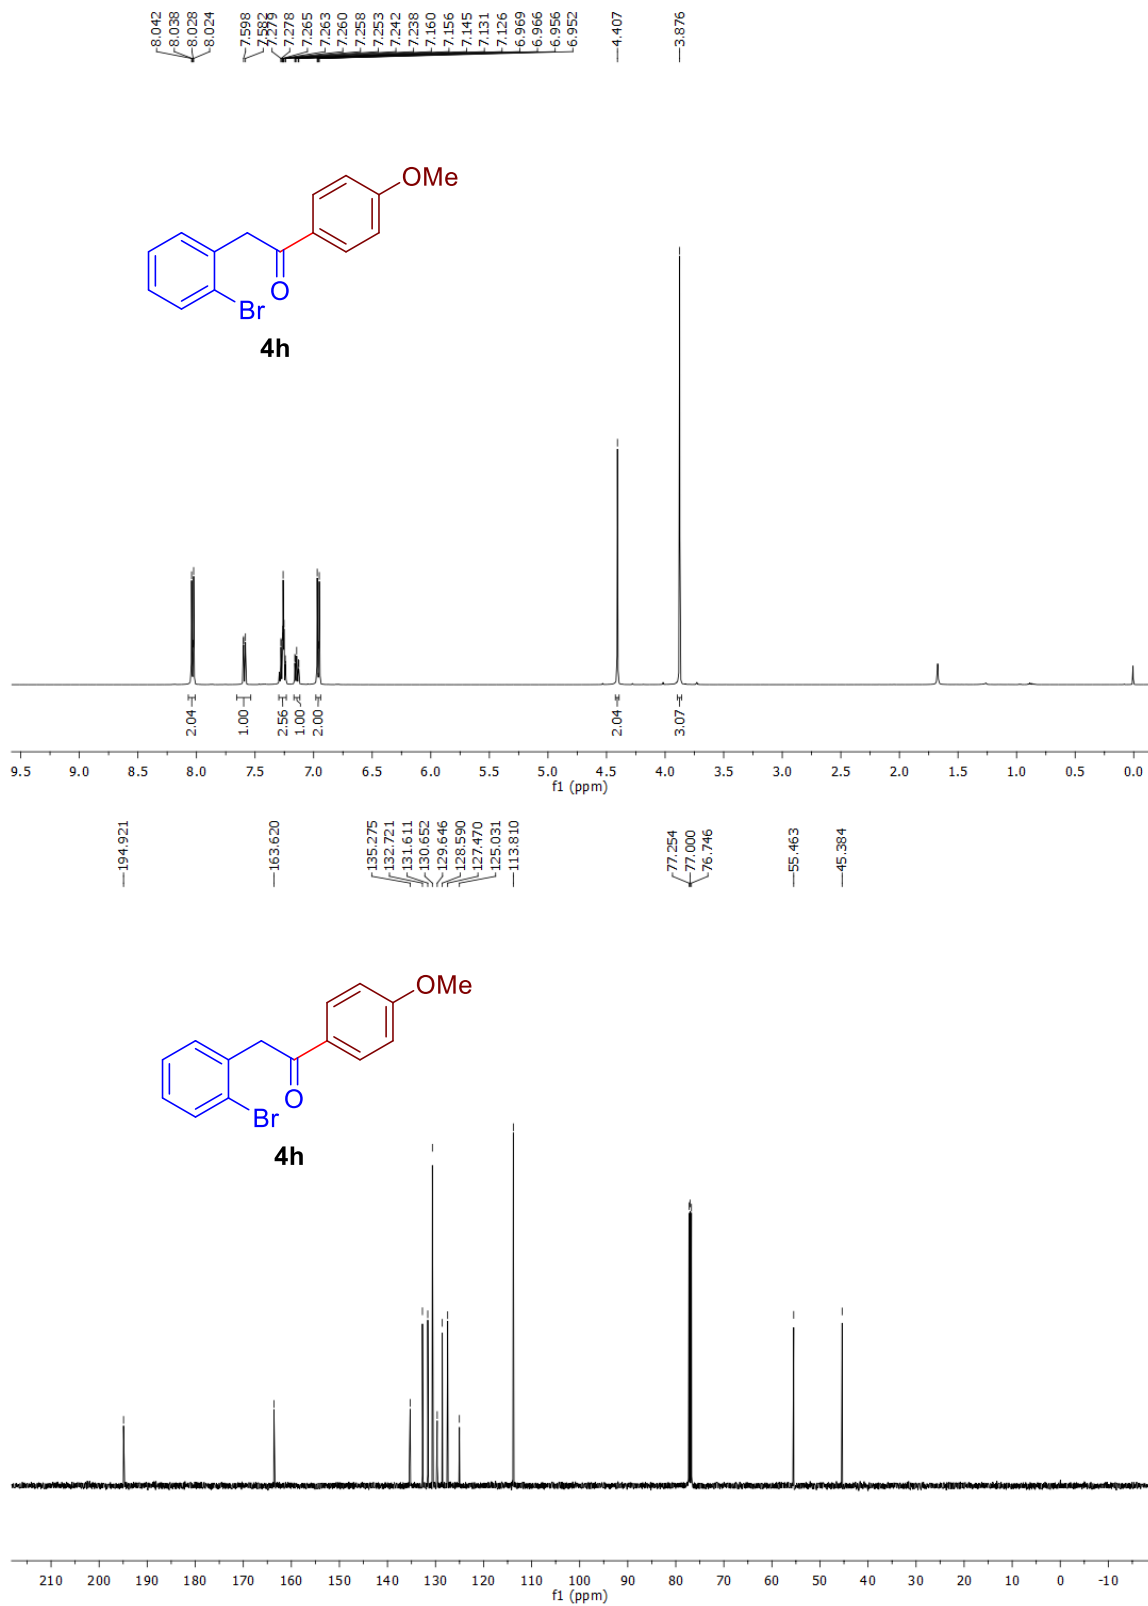

**Figure 5.25.** <sup>1</sup>H NMR (500 MHz) and <sup>13</sup>C NMR (125 MHz) Spectra of (**4h**) in CDCl<sub>3</sub>.

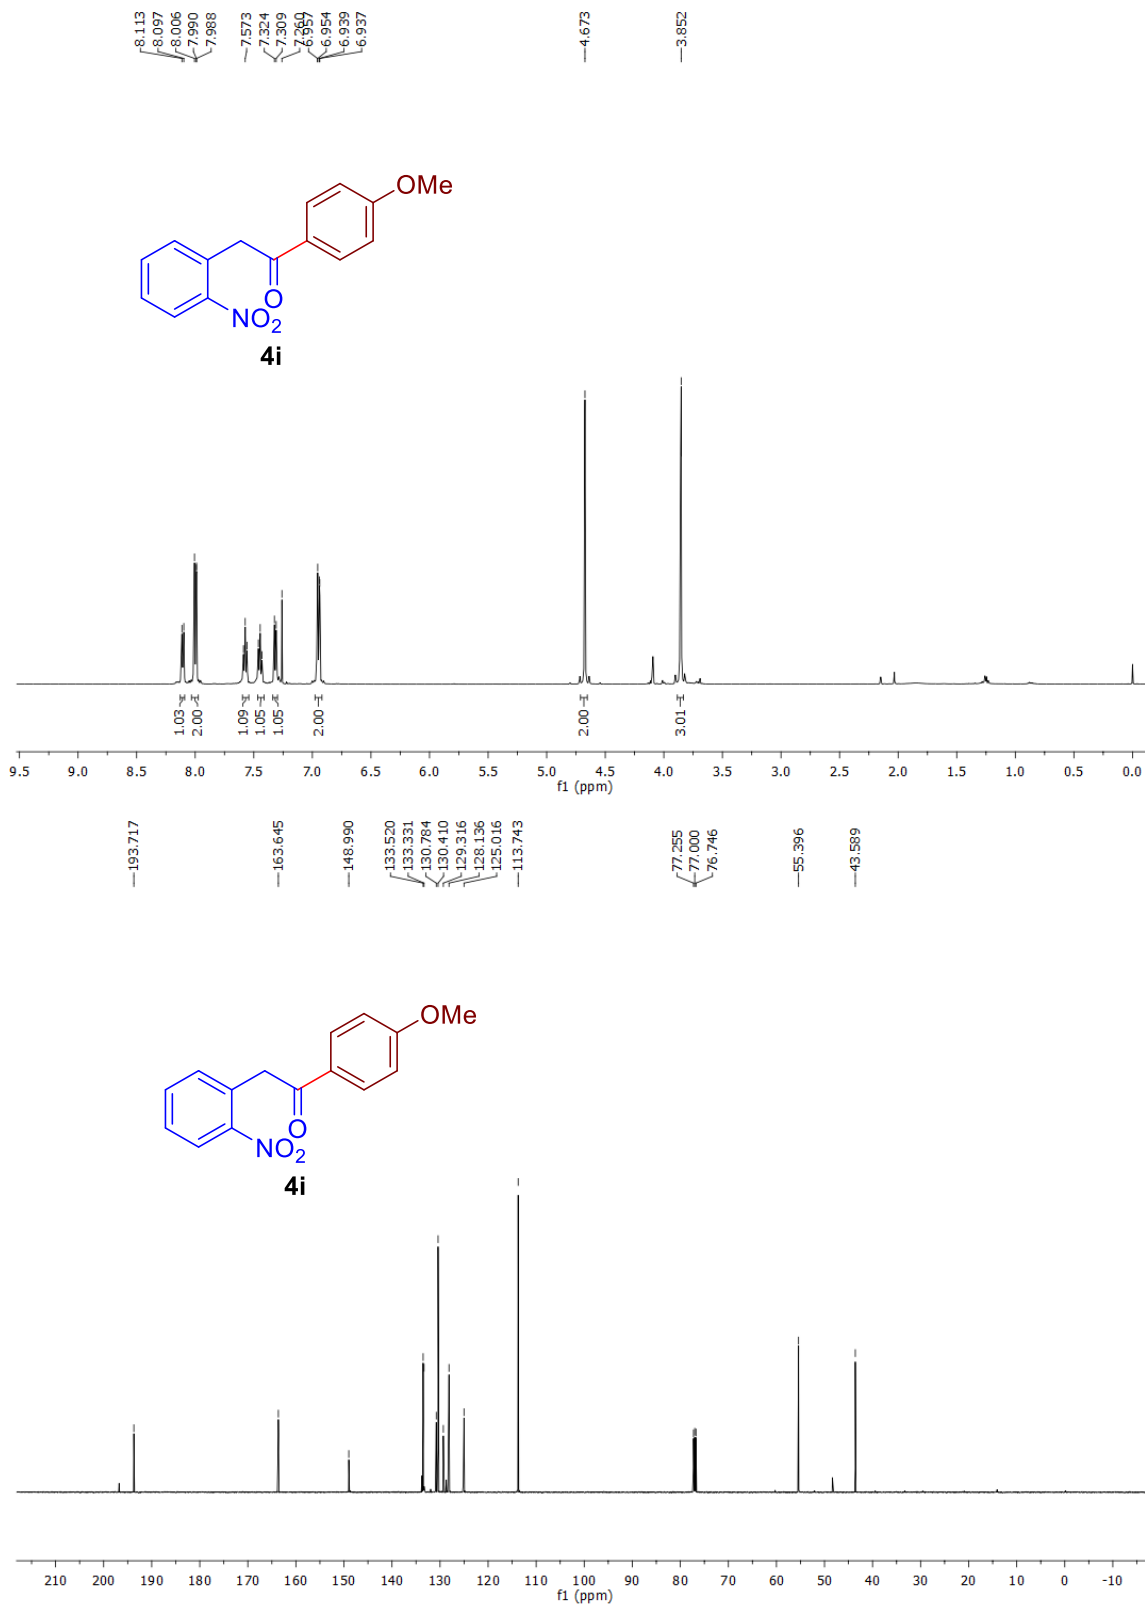

**Figure 5.26.**  $^1\text{H}$  NMR (500 MHz) and  $^{13}\text{C}$  NMR (125 MHz) Spectra of (**4i**) in  $\text{CDCl}_3$ .

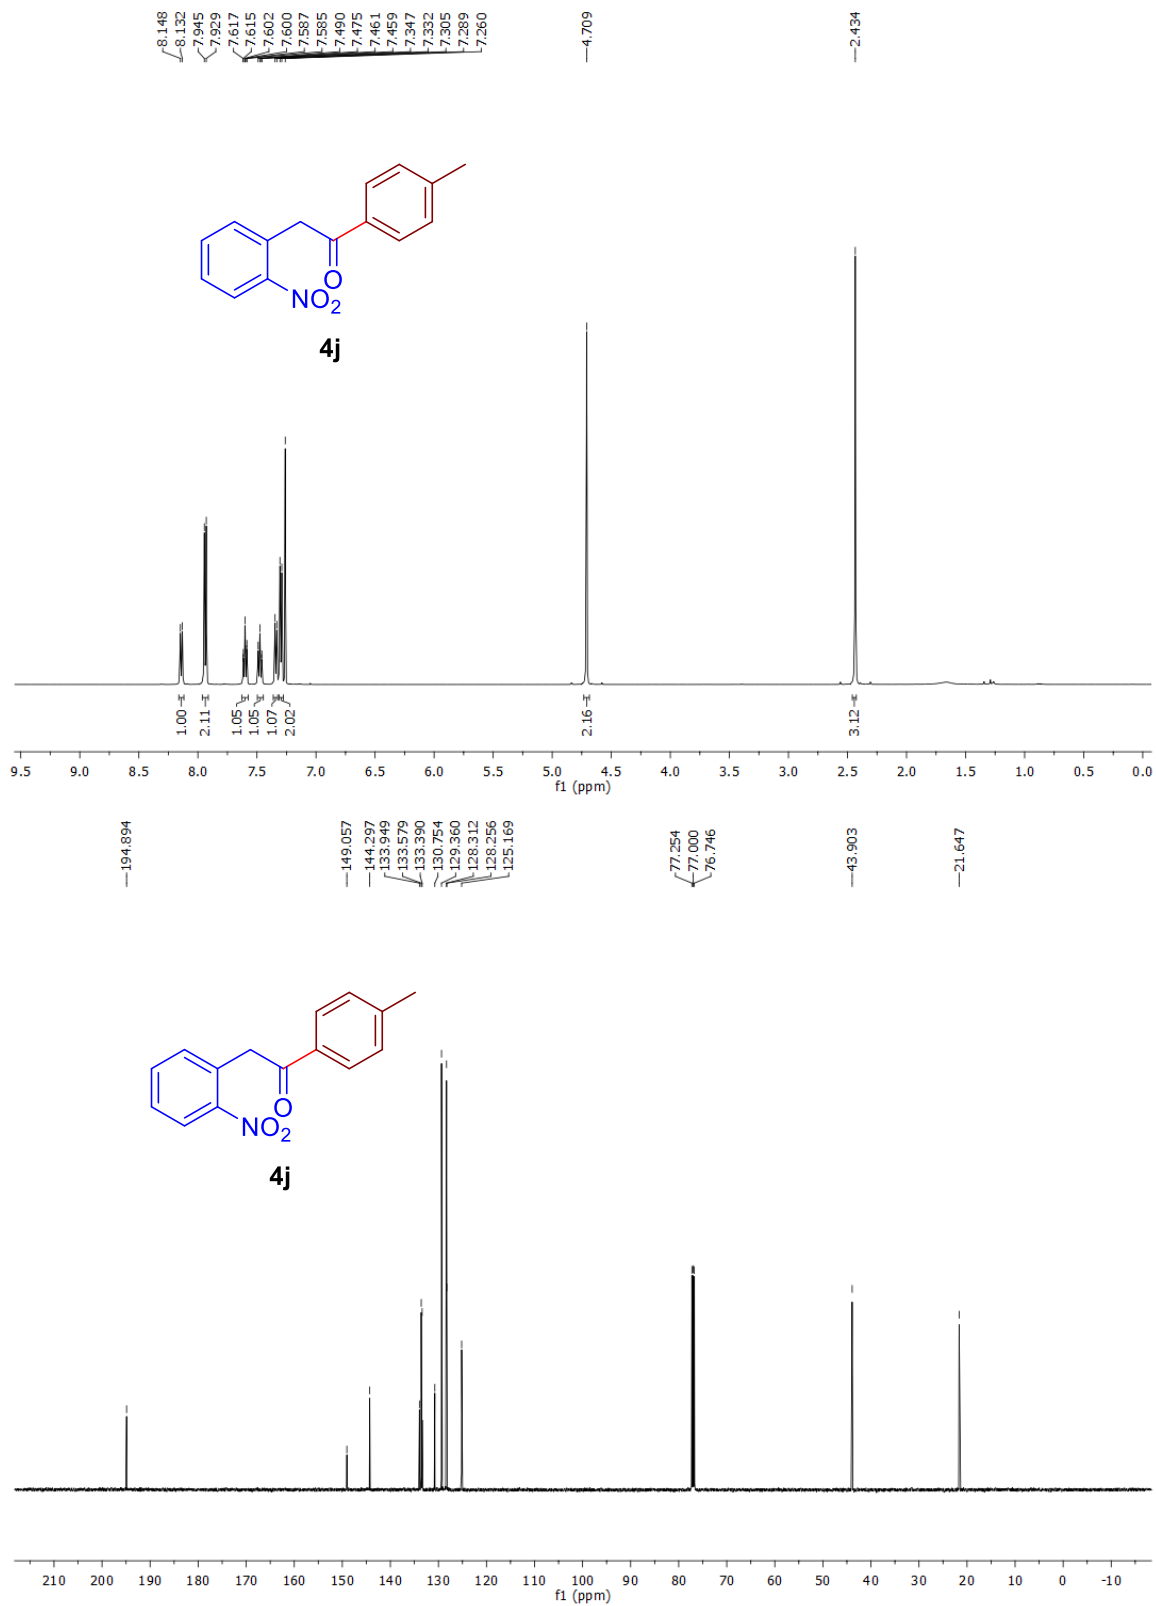

**Figure 5.27.** <sup>1</sup>H NMR (500 MHz) and <sup>13</sup>C NMR (125 MHz) Spectra of (**4j**) in CDCl<sub>3</sub>.

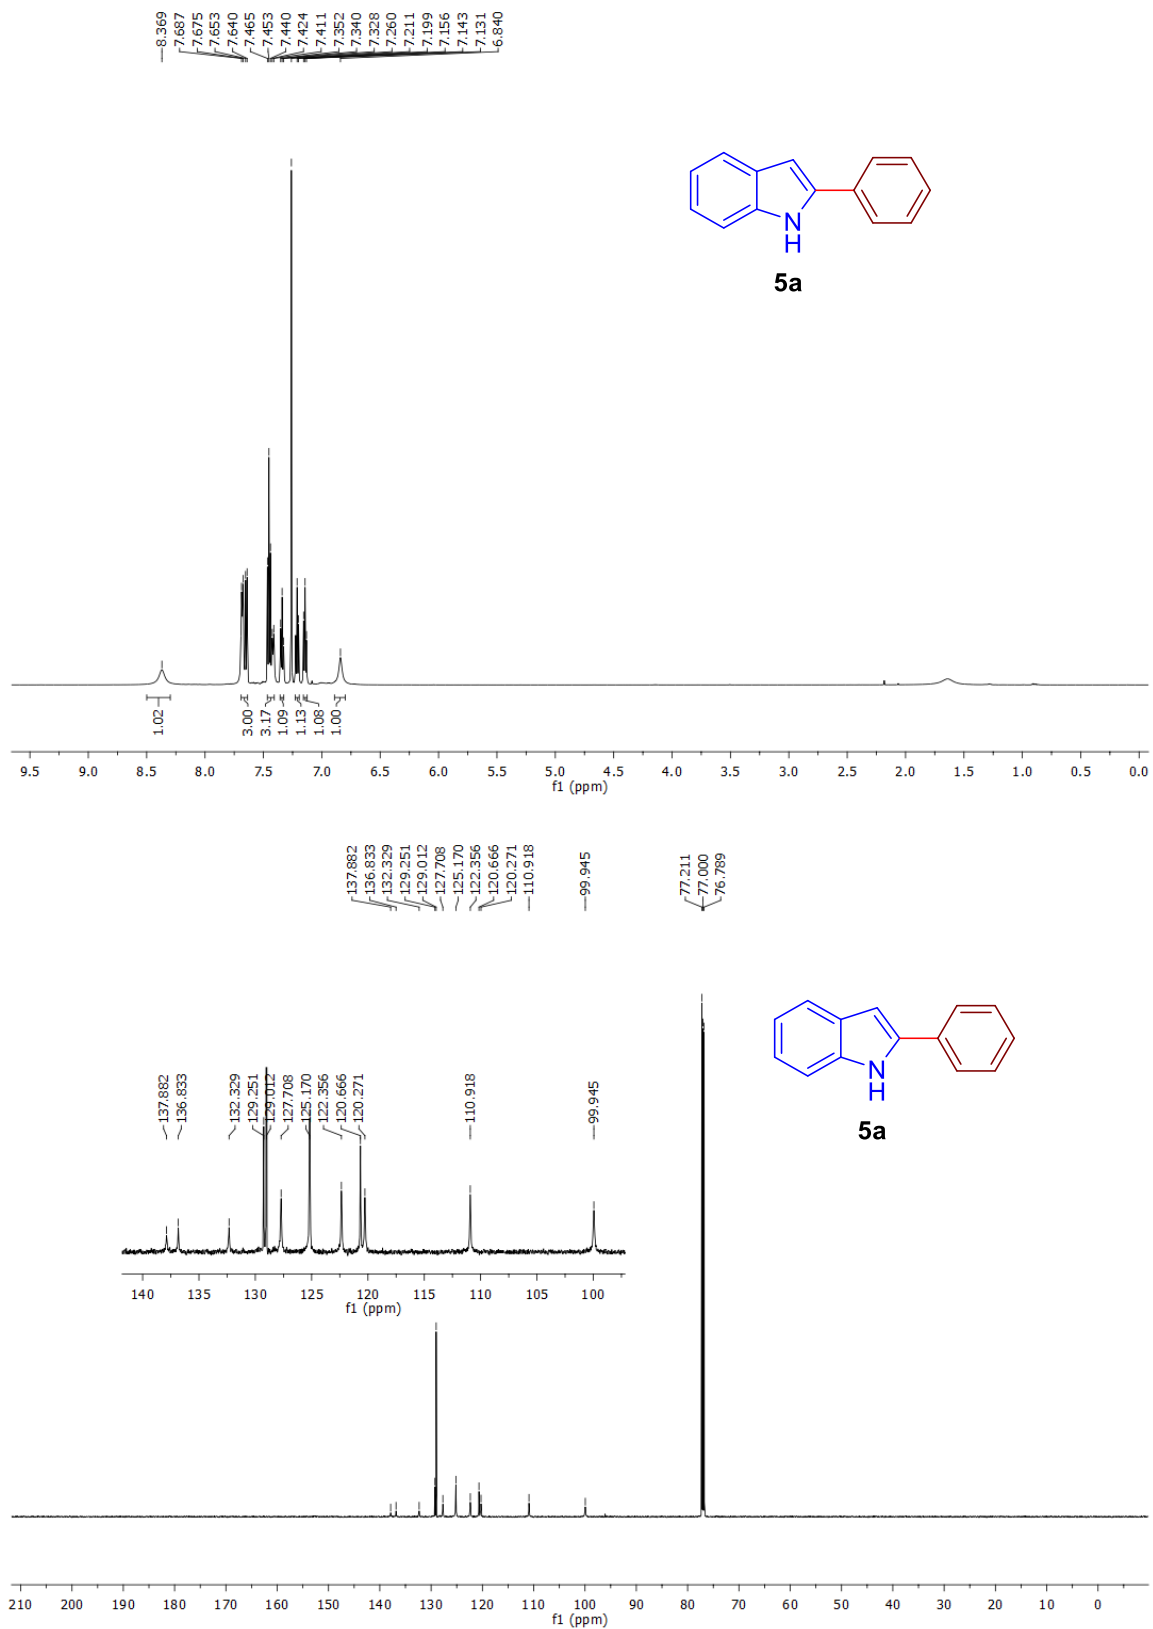

**Figure 5.28.** <sup>1</sup>H NMR (600 MHz) and <sup>13</sup>C NMR (150 MHz) Spectra of (**5a**) in CDCl<sub>3</sub>

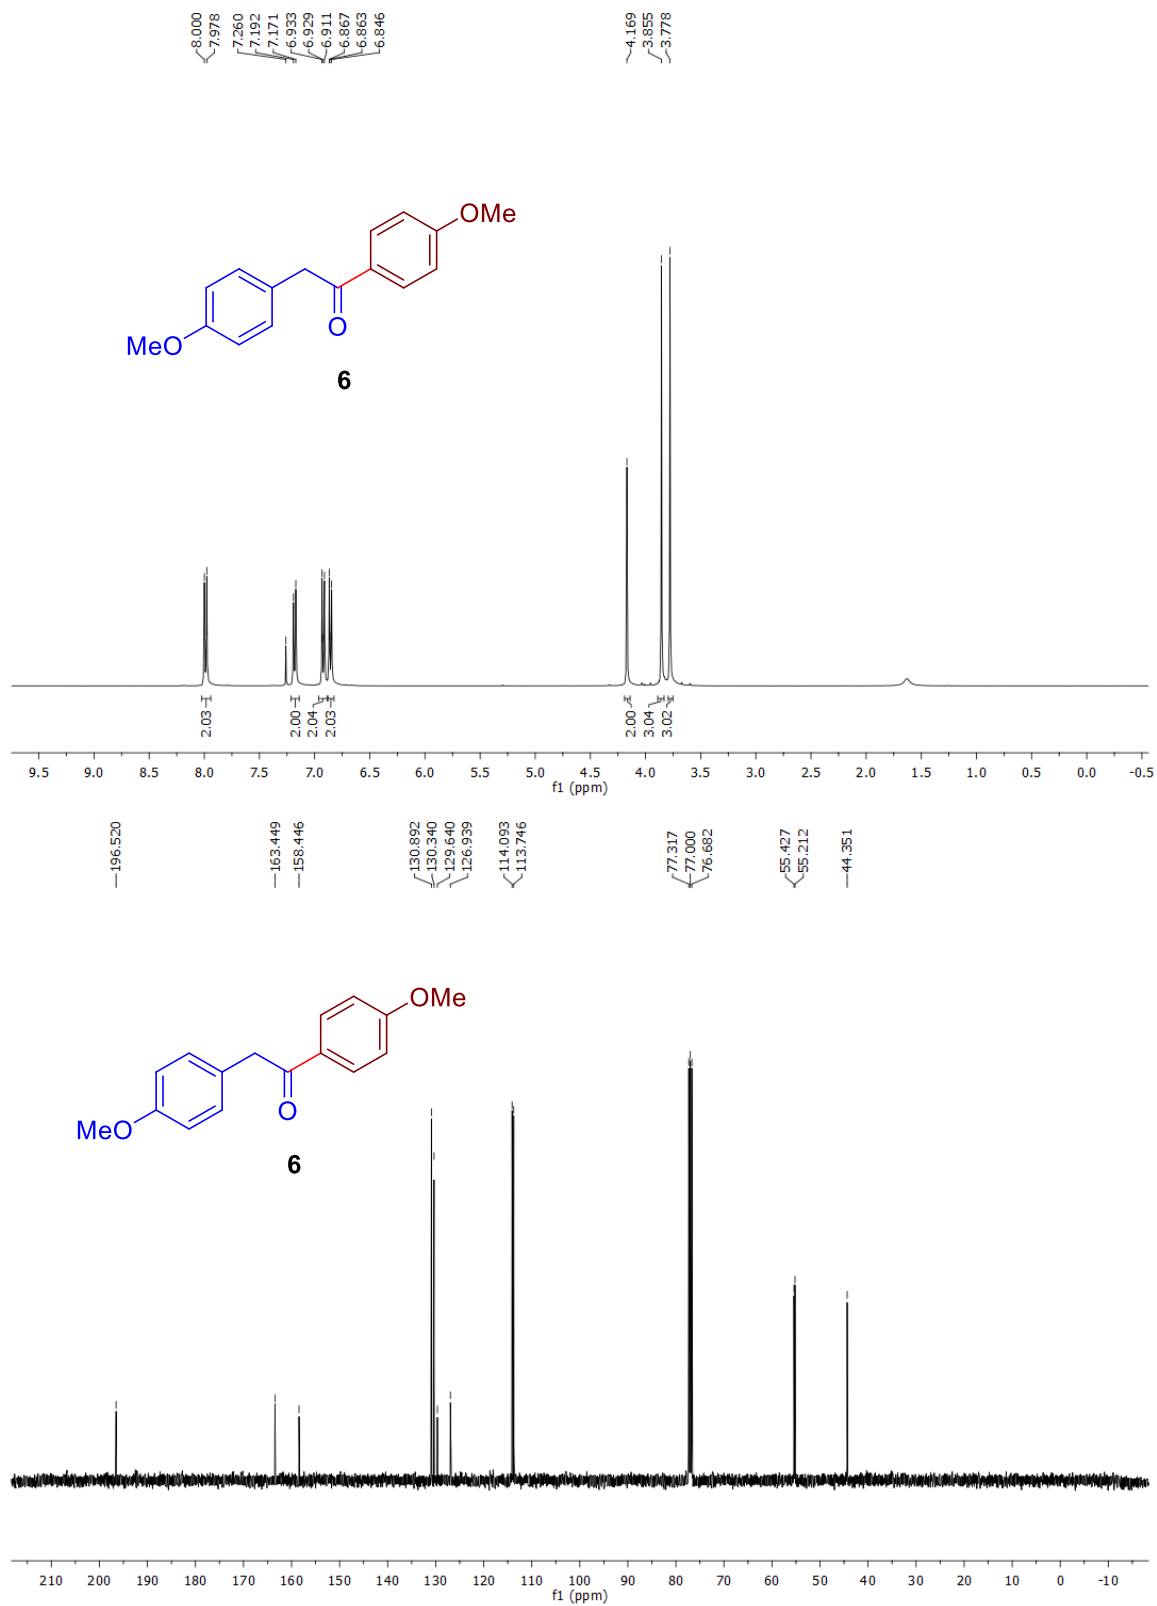

**Figure 5.29.** <sup>1</sup>H NMR (400 MHz) and <sup>13</sup>C NMR (100 MHz) Spectra of (6) in CDCl<sub>3</sub>



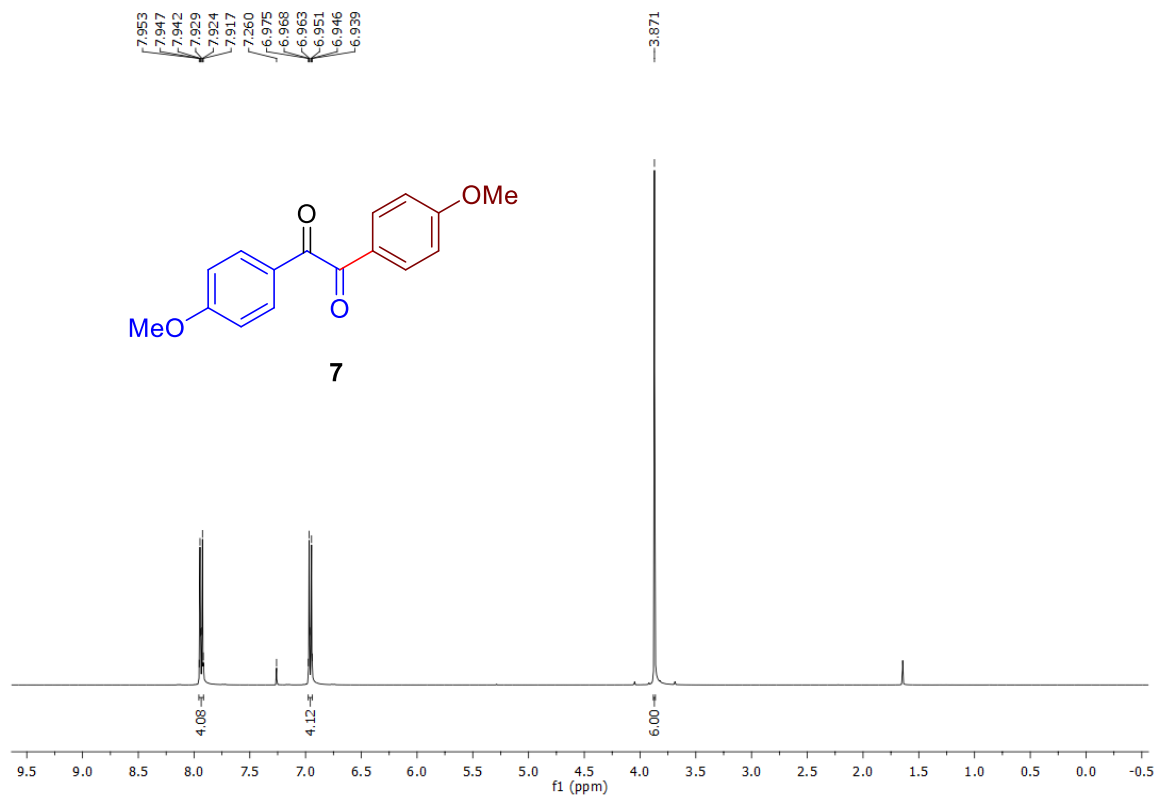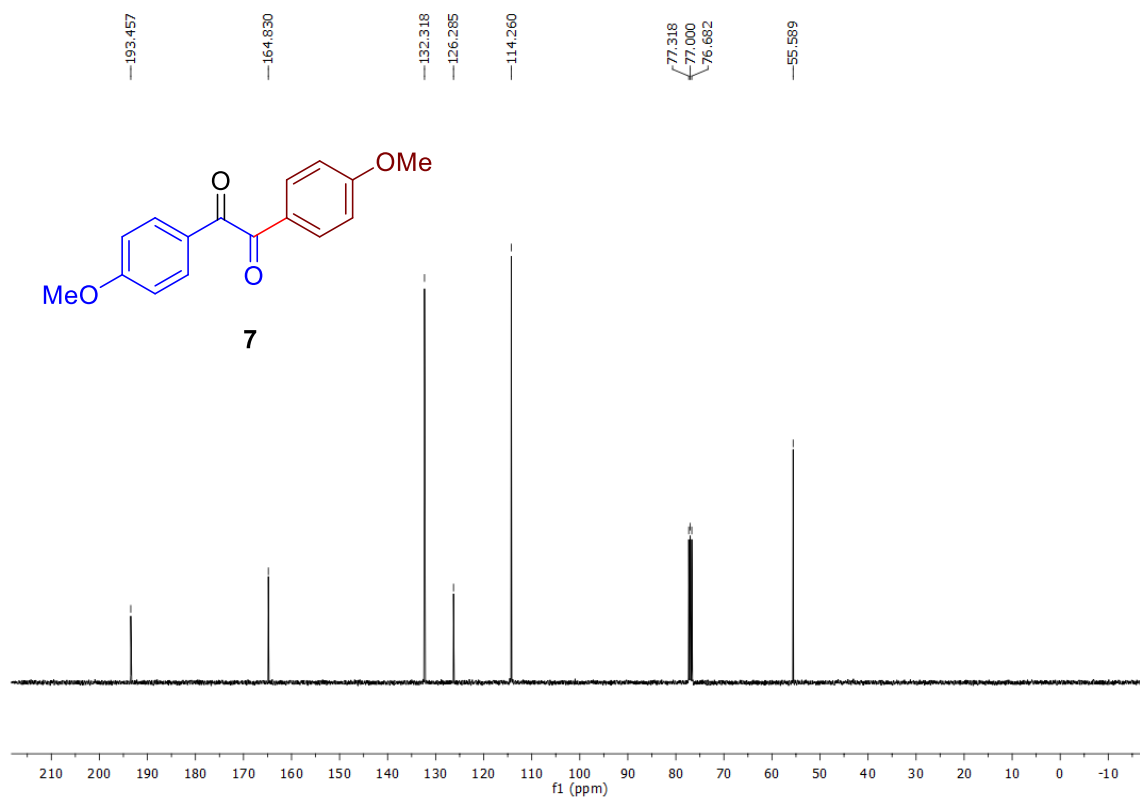

**Figure 5.30.**  $^1\text{H}$  NMR (400 MHz) and  $^{13}\text{C}$  NMR (100 MHz) Spectra of (**7**) in  $\text{CDCl}_3$

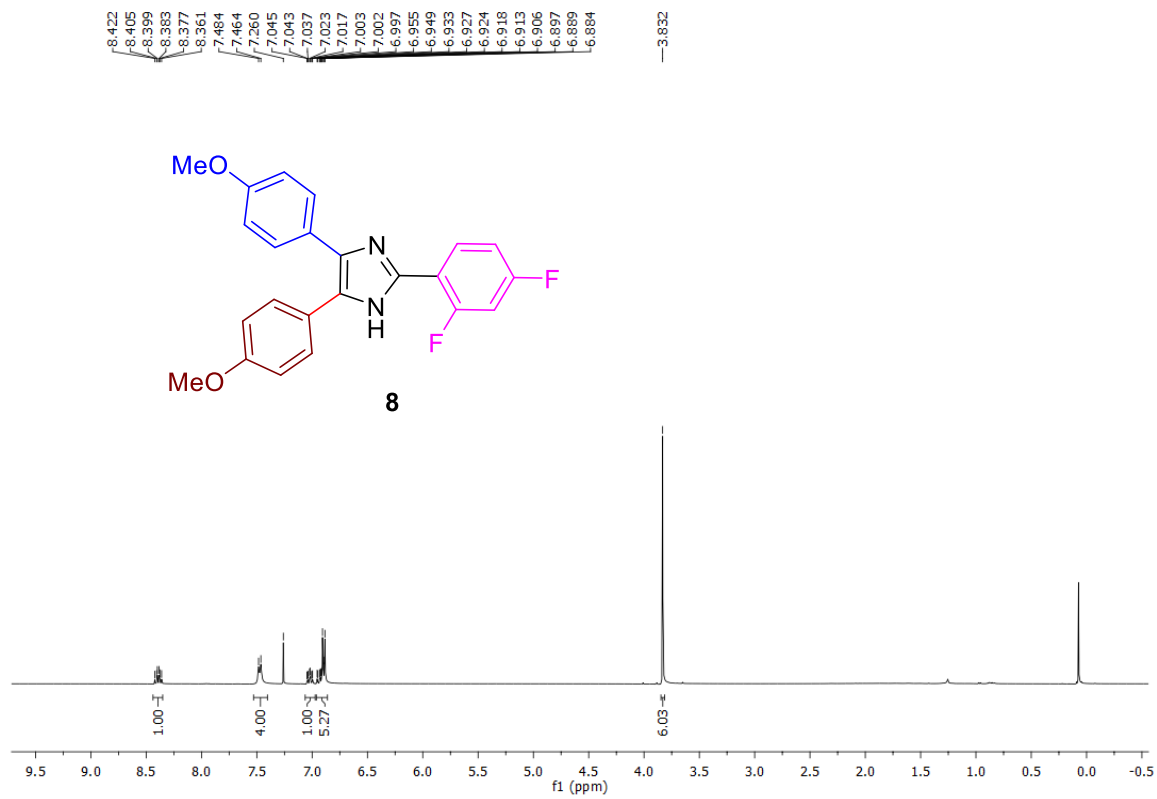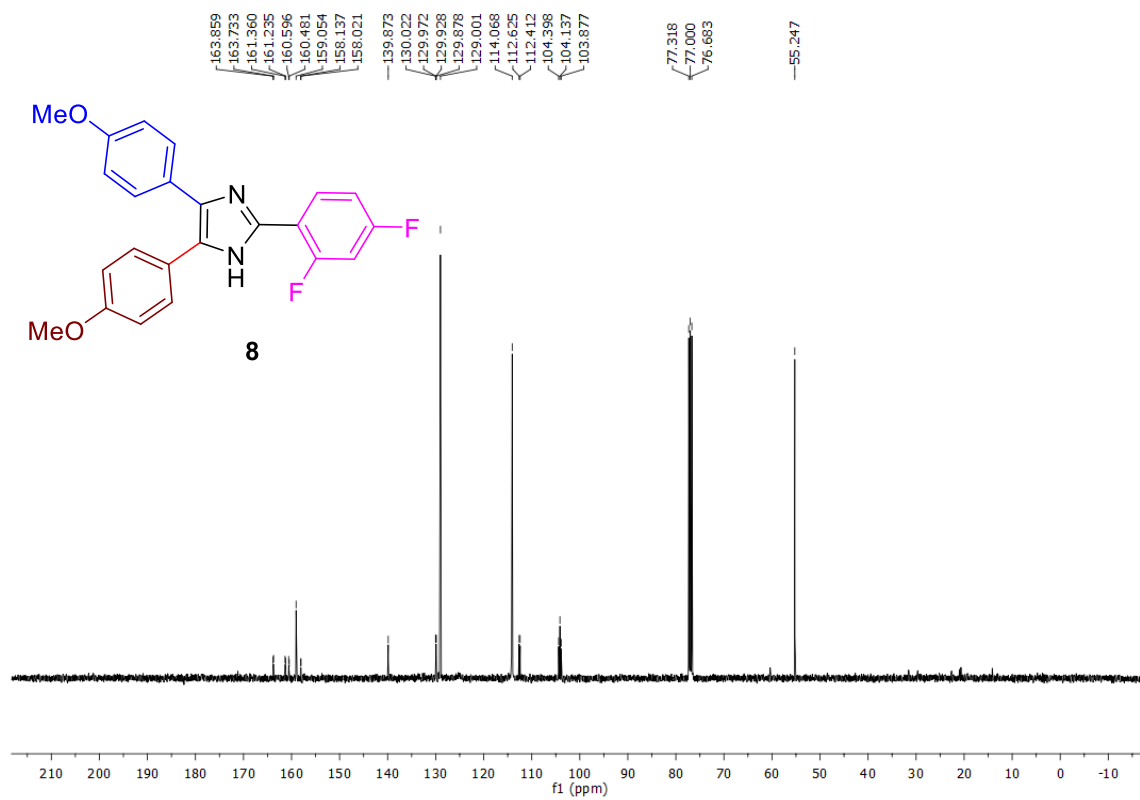

Figure 5.31.  $^1\text{H}$  NMR (400 MHz) and  $^{13}\text{C}$  NMR (100 MHz) Spectra of **(8)** in  $\text{CDCl}_3$

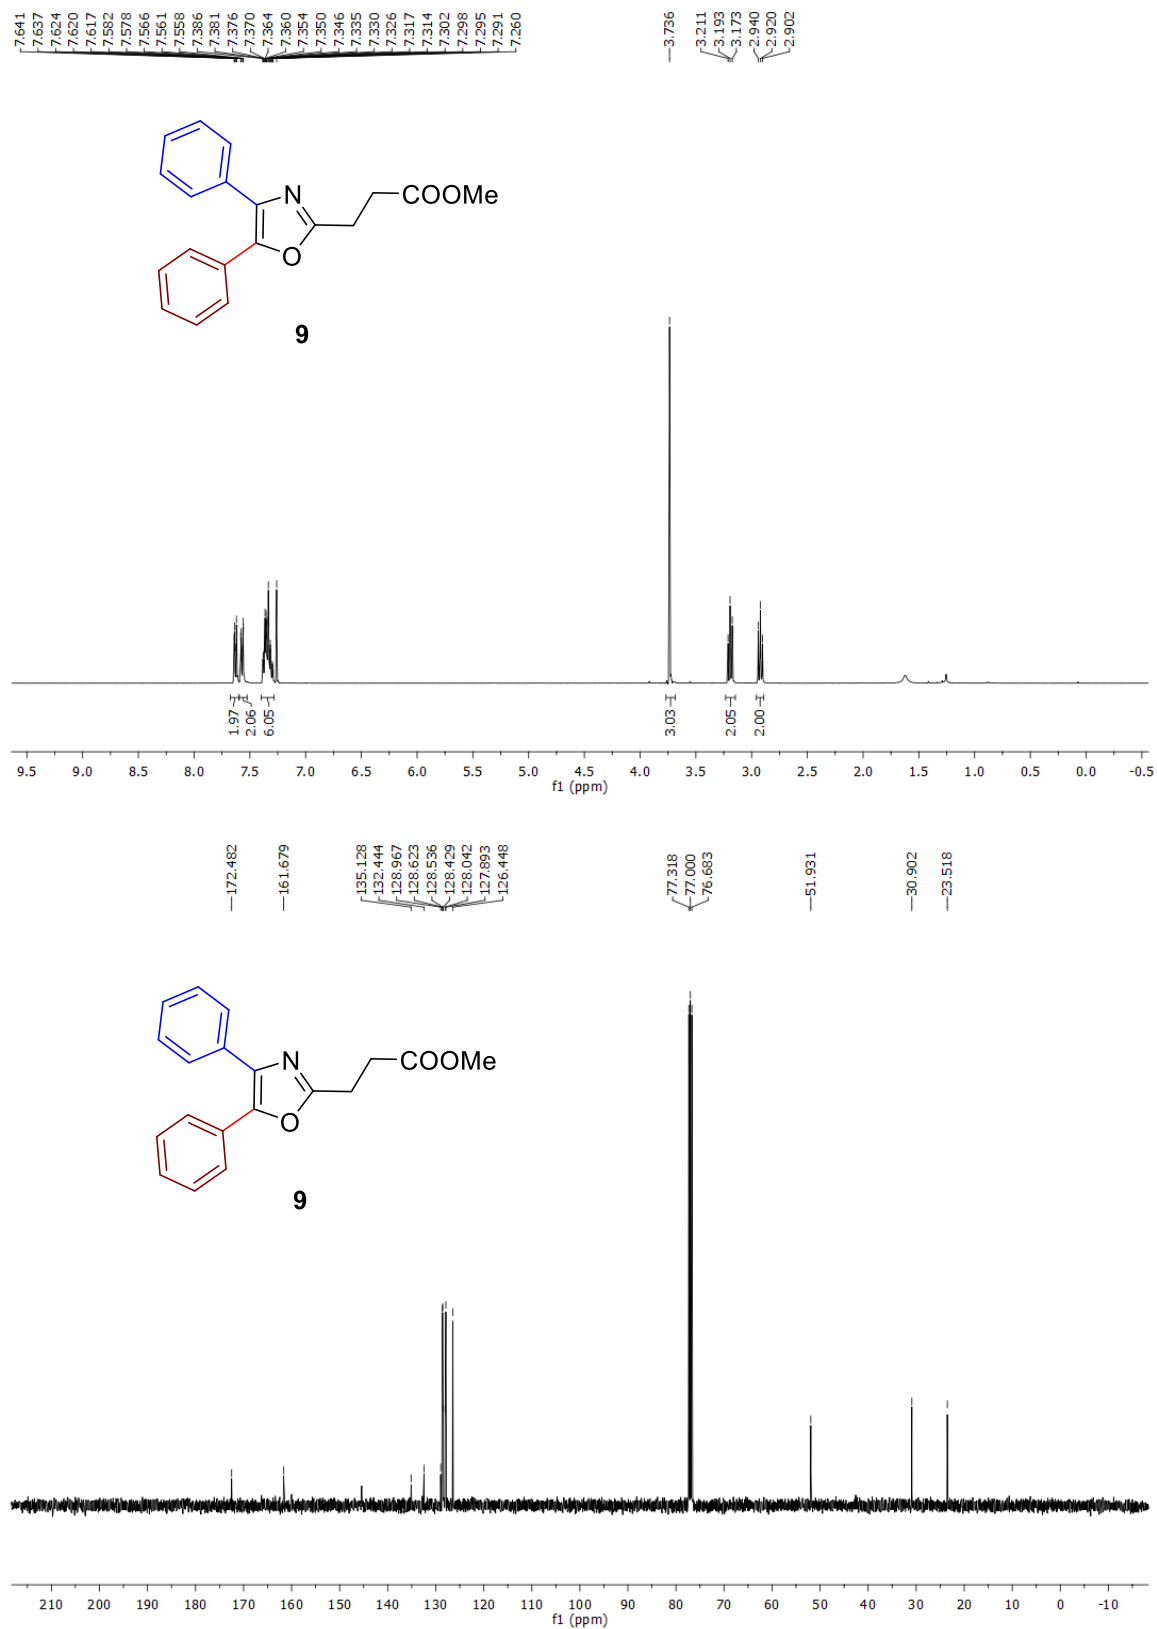

Figure 5.32. <sup>1</sup>H NMR (400 MHz) and <sup>13</sup>C NMR (100 MHz) Spectra of (**9**) in CDCl<sub>3</sub>

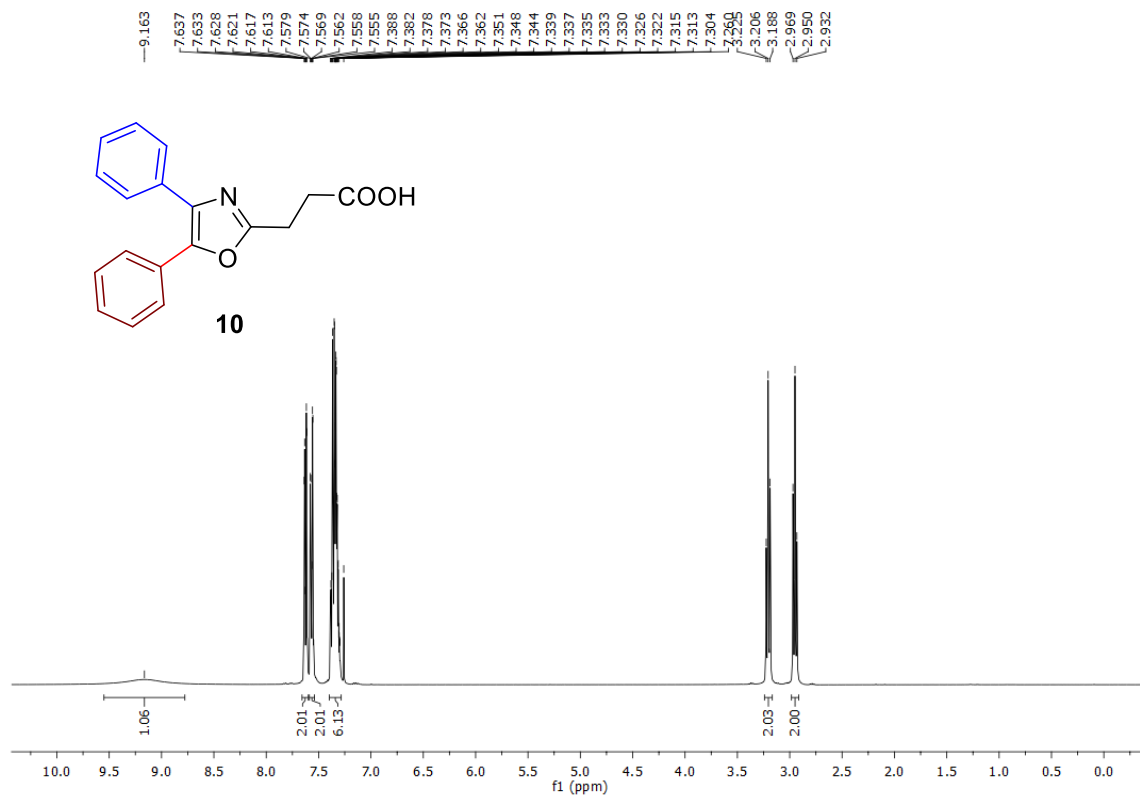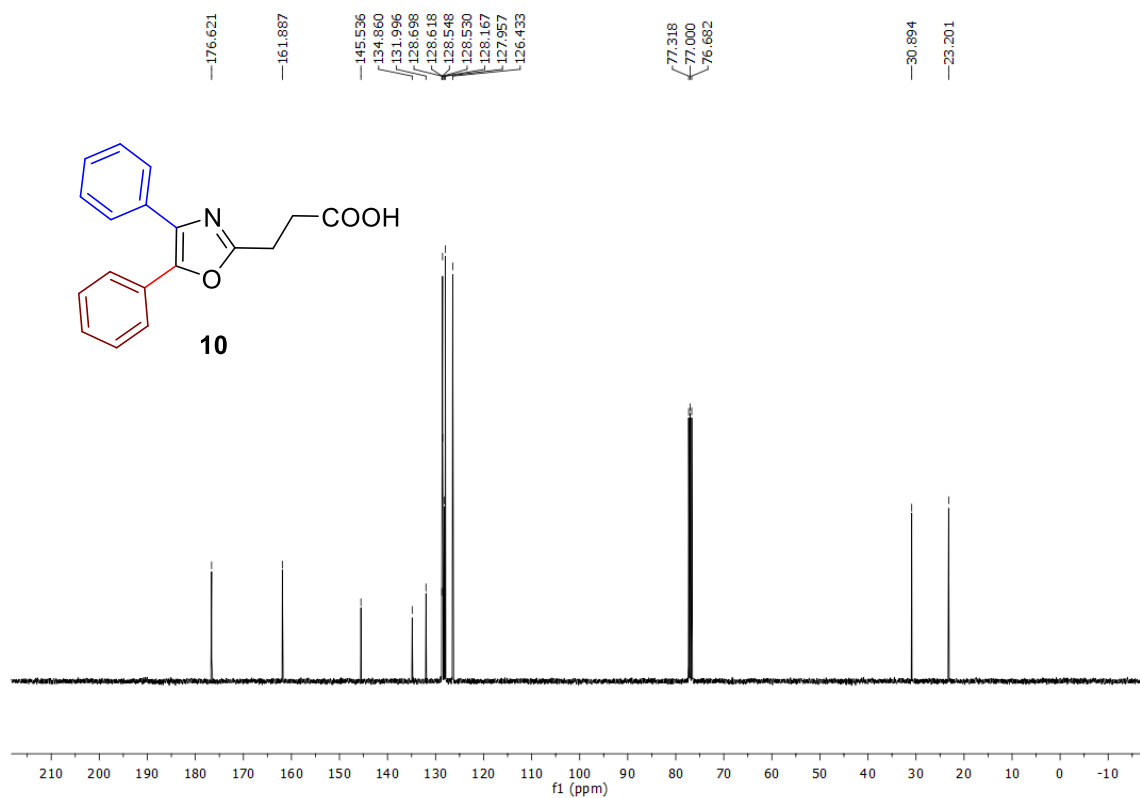

**Figure 5.33.** <sup>1</sup>H NMR (400 MHz) and <sup>13</sup>C NMR (100 MHz) Spectra of (**10**) in CDCl<sub>3</sub>
